# Supplementary material for: A dual-responsive cationic acridinium nanohoop: redox activity and acid/base-controlled reversible guest capture and release
Source: Royal Society of Chemistry journal article supplement (doi:10.1039/d6sc01132b), 2026-04-13
Supplement: d6sc01132b1.pdf [file d6sc01132b1.pdf]

# A Dual-Responsive Cationic Acridinium Nanocholesterol: Redox Activity and Acid/Base-Controlled Reversible Guest Capture and Release

## Supporting information

Jiao Ming, Jin Zhang, Yan Hu, Kai Lan, Dongmei Zhang, Ping Li, Jiarong Miao, Jiyong Jiang, Xiaobo Zhang, Hanchi Zhong, Peiyuan Yu, Chuyang Cheng

|                                                                                         |    |
|-----------------------------------------------------------------------------------------|----|
| 1. General Experimental Details:.....                                                   | 1  |
| 2. Synthesis and Characterization.....                                                  | 2  |
| 3. NMR and Mass spectra .....                                                           | 7  |
| 4. Photophysical properties for Ad[10]CPP (UV, FL, PLQY and Fluorescence lifetime)..... | 18 |
| 5. Electrochemical Characterization (CV and DPV).....                                   | 26 |
| 6. Chemical Oxidation Experiments (UV-vis-IR, EPR).....                                 | 30 |
| 7. Complexation of Ad[10]CPP·TFA with C <sub>60</sub> .....                             | 38 |
| 8. pH-stimulate responsive properties of Ad[10]CPP·TFA .....                            | 43 |
| 9. X-ray crystallographic data .....                                                    | 44 |
| 10. Theoretical Calculations .....                                                      | 52 |
| 11. References.....                                                                     | 85 |

### 1. General Experimental Details:

All reagents were purchased from commercial source and used without further purification. Compound 2<sup>[1]</sup>, 4<sup>[2]</sup>, and 5<sup>[3]</sup> were prepared according to literature method. Anhydrous THF and dichloromethane (DCM) was used by treatment with a solvent purification system. Column chromatography was performed with silica gel (200-300 mesh). Proton (<sup>1</sup>H) NMR and carbon (<sup>13</sup>C) NMR spectra were recorded on AVANCE NEO 400NMR spectrometer with tetramethylsilane (TMS) as the internal standard. Chemical shifts were assigned in ppm relative to residue protons (CHCl<sub>3</sub>: 7.26 for <sup>1</sup>H, 77.16 for <sup>13</sup>C; DMSO: 2.50 for <sup>1</sup>H, 39.52 for <sup>13</sup>C). The following abbreviations were used for multiplicities: s = singlet, d = doublet, t = triplet, m = multiplet. Matrix Assisted Laser Desorption Ionization (MALDI) mass spectra were performed on AXIMA Performance. UV-Vis absorption spectra were recorded on SHIMADZU UV-2600i spectrophotometer in DCM. Photoluminescence (PL) and excitation spectra was obtained by FL970 Fluorescence Spectrometer. The absolute singlet quantum yield, the lifetimes of the singlet excited states of liquid samples were measured using an Fluoromax-3, HORIBA TEMPRO-01 or Fluoroolg-3 spectrometer. UV-Vis-NIR spectra were recorded on HITACHI U-4100 spectrophotometer in DCM. The HPLC chromatogram was obtained by SHIMADZU LC-20AR spectrophotometer in DCM. The electrochemical measurements were carried out in anhydrous CH<sub>3</sub>CN containing n-Bu<sub>4</sub>NBF<sub>4</sub> as supporting electrolyte at a scan rate of 100 mV/s at room temperature under argon atmosphere by CHI 660e electrochemical analyzer. A three-electrode system was used, consisting of a glassy carbon working

electrode (3 mm diameter, geometric area: 0.07 cm<sup>2</sup>), an Ag/AgCl reference electrode, and a Pt wire counter electrode. The working electrode surface was polished routinely with a 0.05 μm alumina-water slurry on a felt surface immediately before use. The EPR spectra were obtained on a Bruker EMX plus X-band EPR spectrometer, where all solvents used were thoroughly deoxygenated via three freeze-pump-thaw cycles prior to analysis. The EPR samples were prepared and sealed in a glovebox prior to measurement.

## 2. Synthesis and Characterization

### Synthesis of Compound 2<sup>[1]</sup>:

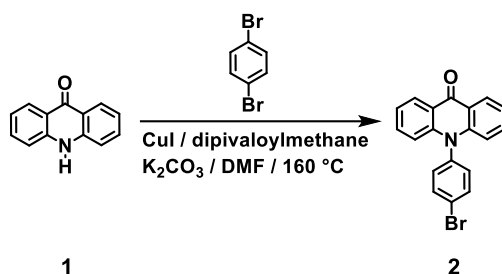

1,4-dibromobenzene (4.79 g, 20.5 mmol), acridin-9(10H)-one (4.0 g, 20.5 mmol), K<sub>2</sub>CO<sub>3</sub> (3.11g, 22.5 mmol), CuI (0.39 g, 2.05 mmol), 2,2,6,6-tetramethyl-3,5-heptanedione (0.76 g, 4.12 mmol) were dissolved in anhydrous DMF (6 mL/1 mmol of acridone) into a two-necked round flask. The mixture was degassed and refluxed under nitrogen atmosphere for 24 h. After cooling to room temperature, the reaction mixture was quenched with H<sub>2</sub>O and extracted with ethyl acetate (3×10 mL). The combined organic layers were collected, dried over sodium sulfate, and evaporated under vacuum. Then, the crude product was purified by flash chromatography on silica gel (petroleum ether/ethyl acetate = 9/1) to afford **2** in 58% yield as a white solid. <sup>1</sup>H NMR (400 MHz, DMSO-*d*<sub>6</sub>) δ 8.38 (dd, *J* = 8.0, 1.7 Hz, 2H), 7.99 (d, *J* = 8.6 Hz, 2H), 7.66 (ddd, *J* = 8.7, 7.0, 1.7 Hz, 2H), 7.54 (d, *J* = 8.5 Hz, 2H), 7.35 (ddd, *J* = 8.0, 7.0, 1.0 Hz, 2H), 6.77 (d, *J* = 8.6 Hz, 2H).

### Synthesis of Compound 3<sup>[4]</sup>:

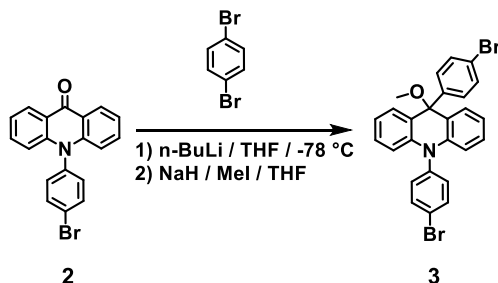

1,4-dibromobenzene (9.35 g, 40 mmol) and dry THF (100 mL) were added to a two-necked 500 mL glass flask filled with N<sub>2</sub>. *n*-butyllithium (16 mL, 40.0 mmol) was added to the flask at -78 °C. After mixing the solution at -78 °C for 30 min, the mixture was cannulated into a degassed THF solution (100 mL) of **2** (3.5 g, 10 mmol) at -78 °C. The mixture was stirred at -78 °C for 3 h and

was subsequently warmed to room temperature. The mixture was quenched with water, extracted with CH<sub>2</sub>Cl<sub>2</sub>, dried over Na<sub>2</sub>SO<sub>4</sub>, and concentrated under reduced pressure. NaH (0.35 g, 60% mineral oil, 8.68 mmol) and MeI (0.54 mL, 8.68 mmol) was suspended in 40 mL anhydrous THF. After 16 h stirring, the excess sodium hydride was quenched by the addition of water. After layer separation, the aqueous layer was extracted with CH<sub>2</sub>Cl<sub>2</sub> three times. The combined organic layers were washed with brine, dried over Na<sub>2</sub>SO<sub>4</sub> and the organic solvents were removed under reduced pressure. The obtained solid was further washed with petroleum ether and acetone to afford **3** in 55% yield as a white solid. <sup>1</sup>H NMR (400 MHz, CDCl<sub>3</sub>) δ 7.80 (d, *J* = 8.5 Hz, 2H), 7.40 (d, *J* = 8.7 Hz, 2H), 7.35 (d, *J* = 8.6 Hz, 2H), 7.24 (d, *J* = 8.5 Hz, 2H), 7.20 (dd, *J* = 7.8, 1.6 Hz, 2H), 7.05 (ddd, *J* = 8.5, 7.1, 1.6 Hz, 2H), 6.87 (td, *J* = 7.5, 1.1 Hz, 2H), 6.32 (dd, *J* = 8.4, 1.1 Hz, 2H), 3.00 (s, 3H). <sup>13</sup>C NMR (101 MHz, CDCl<sub>3</sub>) δ 149.7, 140.8, 139.7, 134.5, 132.9, 130.8, 130.1, 128.3, 122.6, 122.1, 121.0, 120.3, 114.1, 77.9, 50.8. HRMS(ESI): [M-MeO]<sup>+</sup> calcd for C<sub>25</sub>H<sub>16</sub>Br<sub>2</sub>N<sup>+</sup> 487.9645, found 487.9645.

### Synthesis of Compound 6:

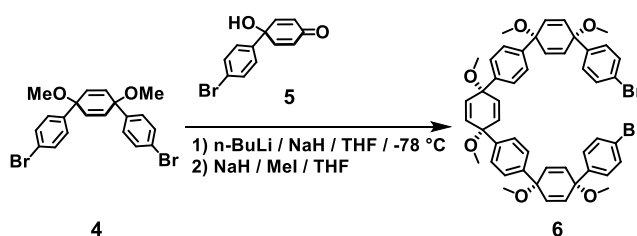

To a 100 mL round-bottom flask containing a magnetic stirring bar were added **4** (11.0 g, 24.6 mmol), and dry THF (100 mL). A solution of *n*-butyllithium in hexane (19.6 mL, 2.5 M, 49.1 mmol) was added at -78 °C. After stirring the mixture at -78 °C for 30 min, the mixture was added to the solution of **5** (6.51 g, 24.6 mmol) and NaH (1.47 g, 60% mineral oil, 36.8 mmol) in THF (100 mL), and the resultant mixture was further stirred at -78 °C for 2 h. After warmed up to room temperature, the mixture was quenched with water, extracted with CH<sub>2</sub>Cl<sub>2</sub>, dried over Na<sub>2</sub>SO<sub>4</sub>, and concentrated under reduced pressure. NaH (3.93 g, 60% mineral oil, 98.2 mmol) and MeI (6.12 mL, 98.2 mmol) was suspended in 100 mL anhydrous THF. After 16 h stirring, the excess sodium hydride was quenched by the addition of water. After layer separation, the aqueous layer was extracted with CH<sub>2</sub>Cl<sub>2</sub> three times. The combined organic layers were washed with brine, dried over Na<sub>2</sub>SO<sub>4</sub> and the organic solvents were removed under reduced pressure. The residue was purified by silica gel column chromatography (EtOAc/petroleum ether = 1/10) to afford **6** in 39% as a white solid. <sup>1</sup>H NMR (400 MHz, CDCl<sub>3</sub>) δ 7.42 (d, *J* = 8.6 Hz, 4H), 7.36 (d, *J* = 8.7 Hz, 4H), 7.32 (d, *J* = 8.7 Hz, 4H), 7.26 (d, *J* = 8.6 Hz, 4H), 6.11 (d, *J* = 10.3 Hz, 4H), 6.08 (s, 4H), 6.04 (d, *J* = 10.3 Hz, 4H), 3.42 (s, 6H), 3.42 (s, 6H), 3.41 (s, 6H). <sup>13</sup>C NMR (101 MHz, CDCl<sub>3</sub>) δ 143.1, 142.7, 142.7, 133.9, 133.5, 133.1, 131.6, 128.0, 126.2, 126.1, 121.7, 74.7, 74.7, 74.6, 52.2, 52.1. HRMS(ESI): [M+Na]<sup>+</sup> calcd for C<sub>48</sub>H<sub>46</sub>Br<sub>2</sub>O<sub>6</sub>Na 901.1544, found 901.1529.

### Synthesis of Compound 7:

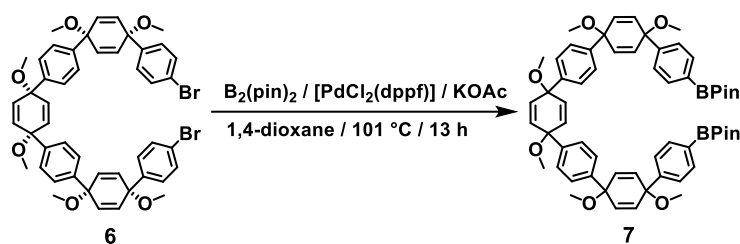

A 100-mL round-bottom glass flask containing a magnetic stirring bar was flame-dried under vacuum and filled with argon after cooling to room temperature. To this flask were added **6** (1.0 g, 1.14 mmol), [PdCl<sub>2</sub>(dppf)] (50.0 mg, 6% mmol), bis(pinacolate)diboron (2.0 g, 8.90 mmol), KOAc (0.9 g, 8.90 mmol), and dry 1,4-dioxane (20 mL). After stirring at 101 °C for 13 h, saturated NH<sub>4</sub>Cl aqueous solution was added to the reaction mixture. The mixture was then extracted with dichloromethane, and the combined organic phase was dried over Na<sub>2</sub>SO<sub>4</sub> and concentrated under reduced pressure. The crude product was subjected to silica gel column chromatography (EtOAc/petroleum ether = 1/10) to afford **7** in 55% yield as a white solid. <sup>1</sup>H NMR (400 MHz, Chloroform-*d*) δ 7.75 (d, *J* = 8.3 Hz, 4H), 7.40 (d, *J* = 8.4 Hz, 4H), 7.34 (s, 8H), 6.08 (m, 12H), 3.42 (s, 12H), 3.41 (s, 6H), 1.33 (s, 24H). <sup>13</sup>C NMR (101 MHz, CDCl<sub>3</sub>) δ 146.6, 142.9, 142.8, 135.1, 133.5, 133.4, 133.3, 126.2, 125.4, 83.9, 75.0, 74.8, 74.7, 52.1, 25.2, 25.0. HRMS(ESI): [M+Na]<sup>+</sup> calcd for C<sub>60</sub>H<sub>70</sub>B<sub>2</sub>O<sub>10</sub>Na 995.5050, found 995.5050.

### Synthesis of Compound Ad[10]CPP-H<sup>[5]</sup>:

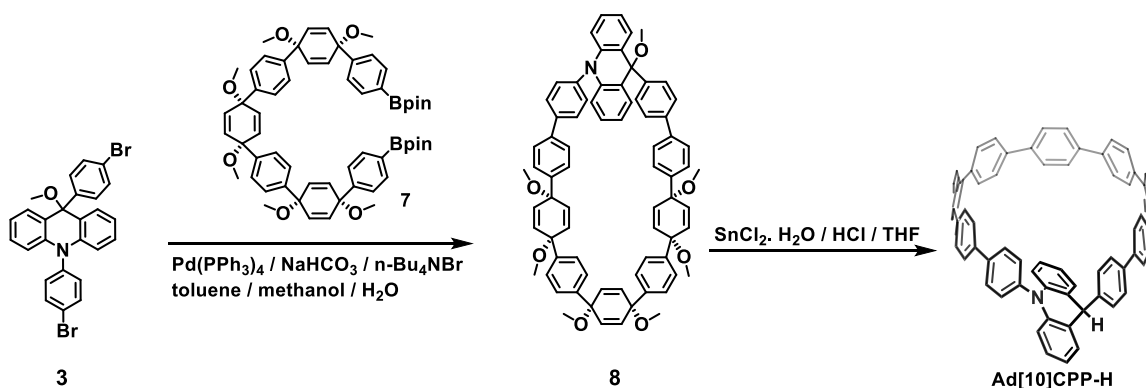

Dibromide **3** (145 mg, 0.28 mmol), diboronate **7** (270 mg, 0.28 mmol), *n*-Bu<sub>4</sub>NBr (36 mg, 0.056 mmol), Pd(PPh<sub>3</sub>)<sub>4</sub> (64 mg, 0.110 mmol) and NaHCO<sub>3</sub> (233 mg, 2.8 mmol) were charged to a dried flask, which was then purged with argon. Degassed toluene (50 mL), methanol (6 mL), and water 3 mL (to make base 1 M) were added. The mixture was heated to 90 °C and stirred for 24 h. The reaction was cooled to room temperature and extracted with CH<sub>2</sub>Cl<sub>2</sub>. The organic layer was washed with brine and dried over sodium sulfate. The organic layer was concentrated down under reduced pressure to a crude solid **8**.

Concentrated aqueous HCl (0.65 mL, 7.8 mmol) was added to a solution of SnCl<sub>2</sub>·2H<sub>2</sub>O (0.88 g, 3.9 mmol) in THF (30 mL) at room temperature and the resulting solution was stirred at same

temperature for 30 min under nitrogen atmosphere. The crude solid **8** was dissolved in THF (20 mL) and then added to the resulting mixture at room temperature. The mixture was stirred at same temperature for 12 h. To the resulting mixture, 10% aqueous NaOH solution was added, and extracted with CH<sub>2</sub>Cl<sub>2</sub>. The combined organic layer was washed with brine, dried over Na<sub>2</sub>SO<sub>4</sub>, filtered and concentrated under reduced pressure. The crude product was subjected to silica gel column chromatography (CH<sub>2</sub>Cl<sub>2</sub>/petroleum ether =1/6) to afford **Ad[10]CPP-H** as a yellow solid (32 mg, 13% for over two steps). <sup>1</sup>H NMR (400MHz, CDCl<sub>3</sub>) δ 7.61-7.55 (m, 14H), 7.55-7.48 (m, 8H), 7.46 (d, *J* = 7.2 Hz, 4H), 7.43 (d, *J* = 8.6 Hz, 2H), 7.37 (d, *J* = 6.3 Hz, 4H), 7.35 (d, *J* = 6.1 Hz, 2H), 7.15 (td, *J* = 7.7, 1.6 Hz, 2H), 7.10 (d, *J* = 8.4 Hz, 4H), 7.06 (td, *J* = 7.4, 1.2 Hz, 2H), 6.96 (d, *J* = 8.3 Hz, 2H), 6.84 (dd, *J* = 8.1, 1.2 Hz, 2H), 5.32 (s, 1H). <sup>13</sup>C NMR (101 MHz, CDCl<sub>3</sub>) δ 144.1, 142.5, 141.5, 140.9, 139.9, 139.6, 139.0, 138.9, 138.8, 138.4, 138.3, 138.3, 138.2, 138.2, 138.0, 137.8, 137.6, 130.5, 129.3, 128.8, 128.3, 127.9, 127.8, 127.8, 127.6, 127.6, 127.6, 127.6, 127.5, 127.5, 127.4, 127.3, 127.2, 127.1, 126.9, 121.7, 116.5, 47.2. HRMS (MALDI): [M]<sup>+</sup> calcd for 863.3552, found 863.3533 (matrix: DCTB, internal standard: PPG, cationization agent: KI, linear mode).

#### Synthesis of Compound **Ad[10]CPP-OH**:

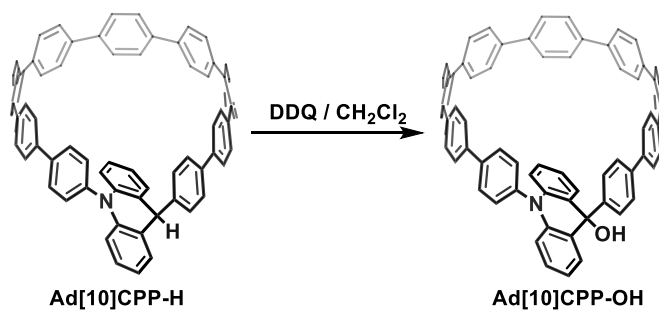

A solution of **Ad[10]CPP-H** (20.0 mg, 23.1 μmol) in CH<sub>2</sub>Cl<sub>2</sub> (10.0 mL) was treated at room temperature with an excess of 2,3-Dichloro-5,6-Dicyanobenzoquinone (DDQ) (20.1mg, 88.5 μmol) and was stirred for 12 h. The mixture was quenched with a saturated solution of Na<sub>2</sub>S<sub>2</sub>O<sub>3</sub>. The mixture was extracted by CH<sub>2</sub>Cl<sub>2</sub>. The organic layer was dried over Na<sub>2</sub>SO<sub>4</sub> and concentrated in vacuo. The residue purified by chromatography over silica gel with CH<sub>2</sub>Cl<sub>2</sub> to provide **Ad[10]CPP-OH** (11.0 mg, 54 %). <sup>1</sup>H NMR (400 MHz, 298 K, CDCl<sub>3</sub>): δ (ppm) 8.02 (dd, *J* = 7.4, 1.8 Hz, 2H), 7.63-7.47 (m, 23H), 7.47-7.41 (m, 4H), 7.39-7.34 (m, 6H), 7.19 (td, *J* = 7.6, 1.9 Hz, 2H), 7.15 (td, *J* = 7.3, 1.5 Hz, 2H), 7.06 (dd, *J* = 8.4, 4.2 Hz, 4H), 6.80 (dd, *J* = 7.8, 1.5 Hz, 2H), 2.86 (s, 1H). <sup>13</sup>C NMR (101 MHz, CDCl<sub>3</sub>) δ (ppm) 145.5, 141.3, 140.9, 140.7, 139.9, 139.7, 139.2, 138.9, 138.9, 138.8, 138.3, 138.2, 138.1, 138.1, 138.1, 137.9, 137.7, 137.4, 130.8, 129.7, 129.4, 128.2, 127.8, 127.8, 127.7, 127.7, 127.6, 127.5, 127.5, 127.5, 127.5, 127.4, 127.3, 127.2, 127.0, 127.0, 126.8, 124.7, 121.6, 115.7, 73.6. HRMS (MALDI): [M]<sup>+</sup> calcd for C<sub>67</sub>H<sub>45</sub>NO 879.3501, found 879.3464 (matrix: DCTB, internal standard: PPG, cationization agent: KI, linear mode).

#### Synthesis of Compound **Ad[10]CPP·BF<sub>4</sub>**

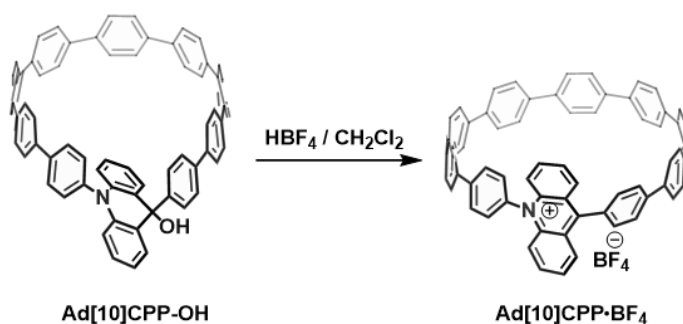

0.3 mL HBF<sub>4</sub> (40%) was added to a solution of Ad[10]CPP-OH (5.0 mg) in CH<sub>2</sub>Cl<sub>2</sub> (5.0 mL) at room temperature and the resulting solution was stirred at the same temperature for 3 h. The mixture was concentrated under reduced pressure to afford Ad[10]CPP•BF<sub>4</sub> as a dark purple solid. (**Basis for quantitative reaction in Figure S14**). <sup>1</sup>H NMR (400MHz, CDCl<sub>3</sub>) δ (ppm) 8.30 (dd, *J* = 8.7, 1.3 Hz, 2H), 7.99 (ddd, *J* = 9.0, 6.9, 1.4 Hz, 2H), 7.79 (d, *J* = 8.6 Hz, 2H), 7.74 (d, *J* = 9.0 Hz, 2H), 7.70 (m, 6H), 7.67-7.59 (m, 8H), 7.55 (m, 20H), 7.32 (d, *J* = 8.7 Hz, 2H). <sup>13</sup>C NMR (101 MHz, CDCl<sub>3</sub>) δ (ppm) 165.0, 145.3, 144.4, 143.3, 139.4, 139.3, 138.7, 138.6, 138.5, 138.3, 138.2, 138.2, 138.0, 137.4, 137.1, 132.6, 132.1, 130.3, 129.7, 128.8, 128.5, 128.3, 128.2, 127.9, 127.6, 127.5, 127.5, 127.3, 127.3, 127.3, 127.2, 127.2, 126.5, 120.1. HRMS (MALDI): [M]<sup>+</sup> calcd for C<sub>67</sub>H<sub>44</sub>N<sup>+</sup> 862.3468, found 862.3437 (matrix: HABA, internal standard: PPG, reflectron mode).

### 3. NMR and Mass spectra

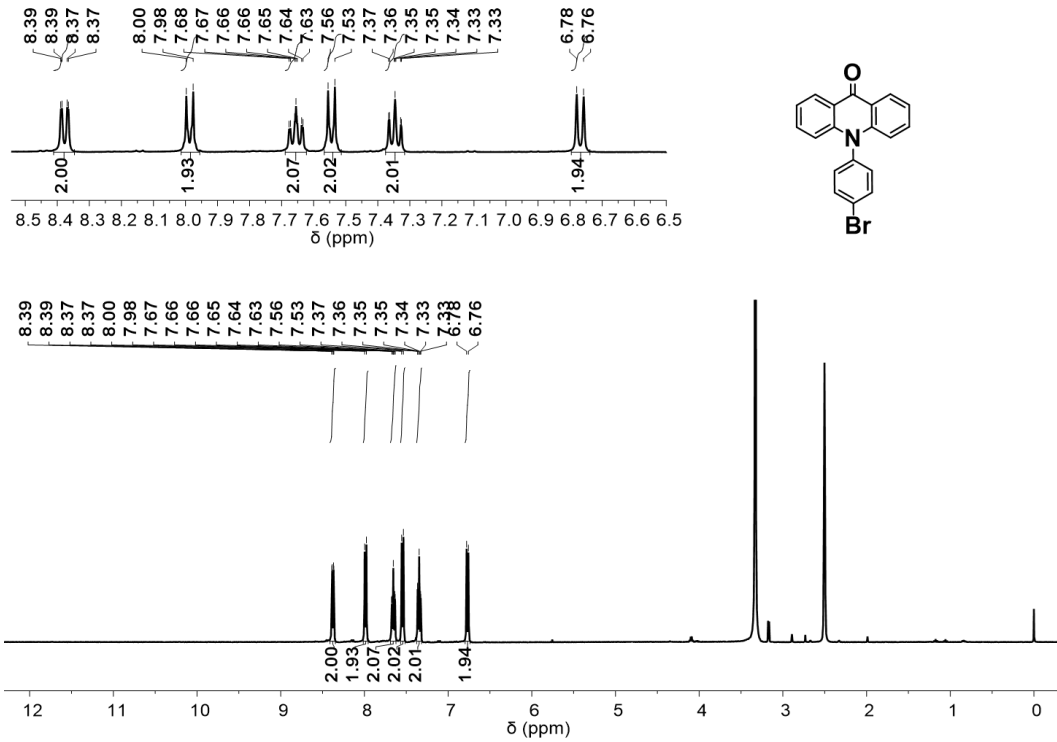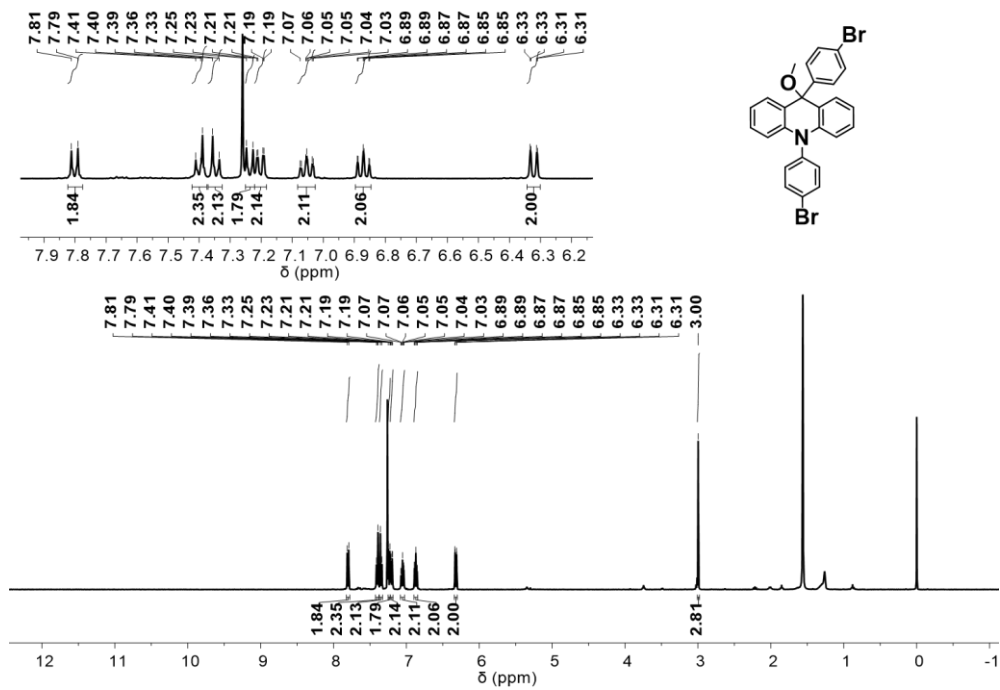



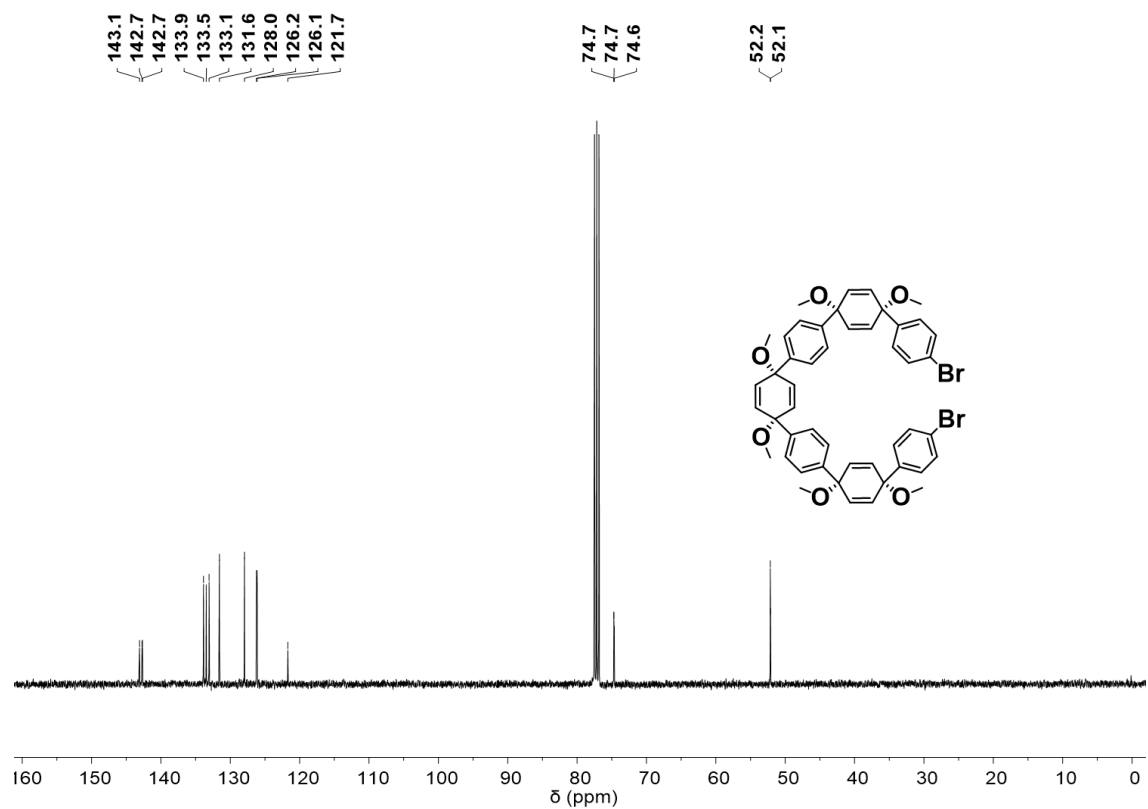

Figure S5.  $^{13}\text{C}$  NMR spectra of **6** in  $\text{CDCl}_3$  (298 K, 400 MHz).

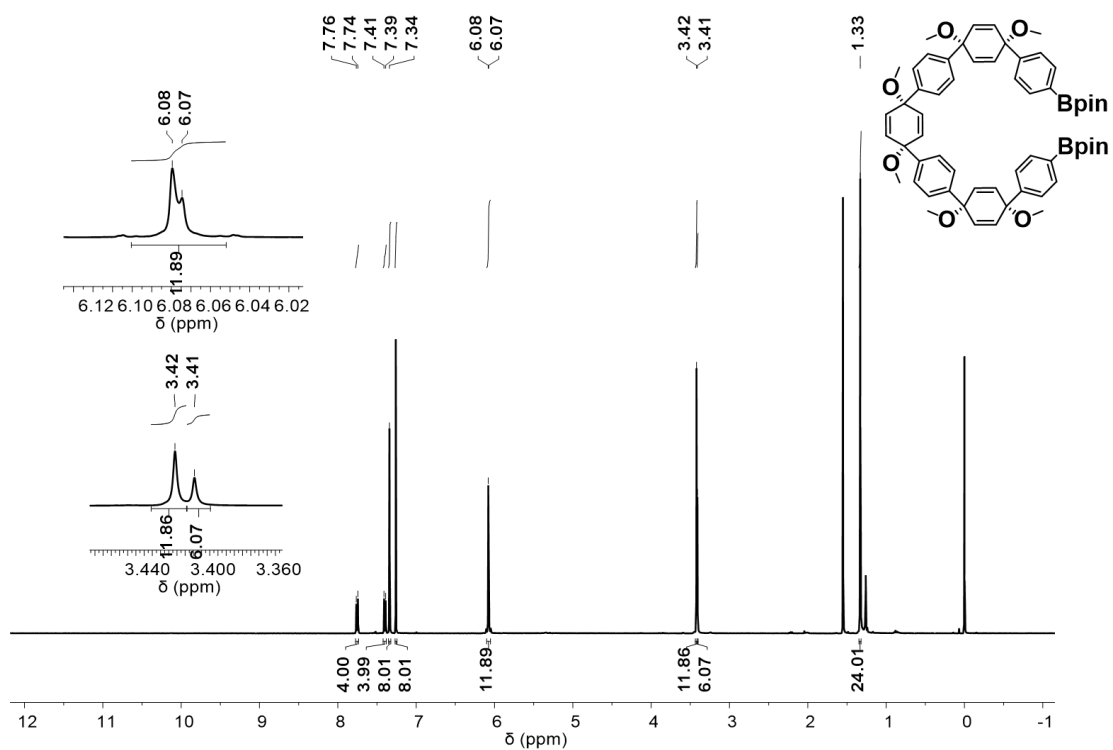

Figure S6.  $^1\text{H}$  NMR spectra of **7** in  $\text{CDCl}_3$  (298 K, 400 MHz).

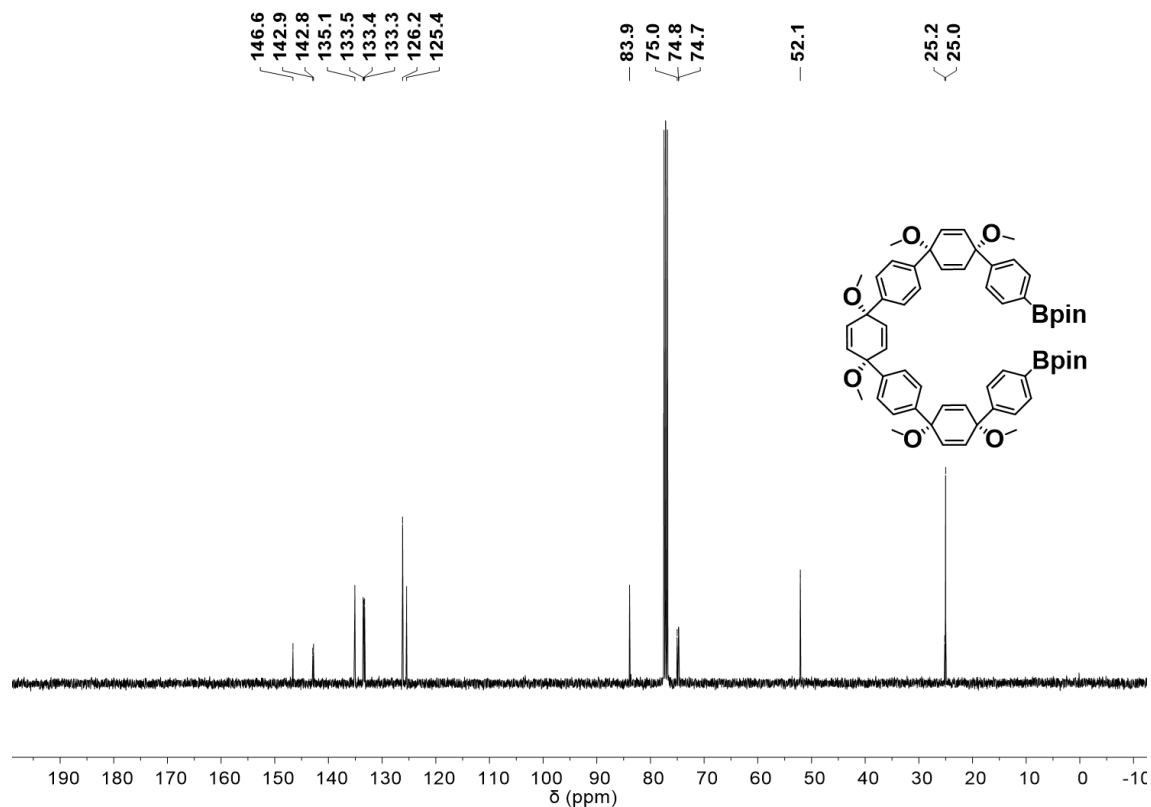

Figure S7.  $^{13}\text{C}$  NMR spectra of **7** in  $\text{CDCl}_3$  (298 K, 400 MHz).

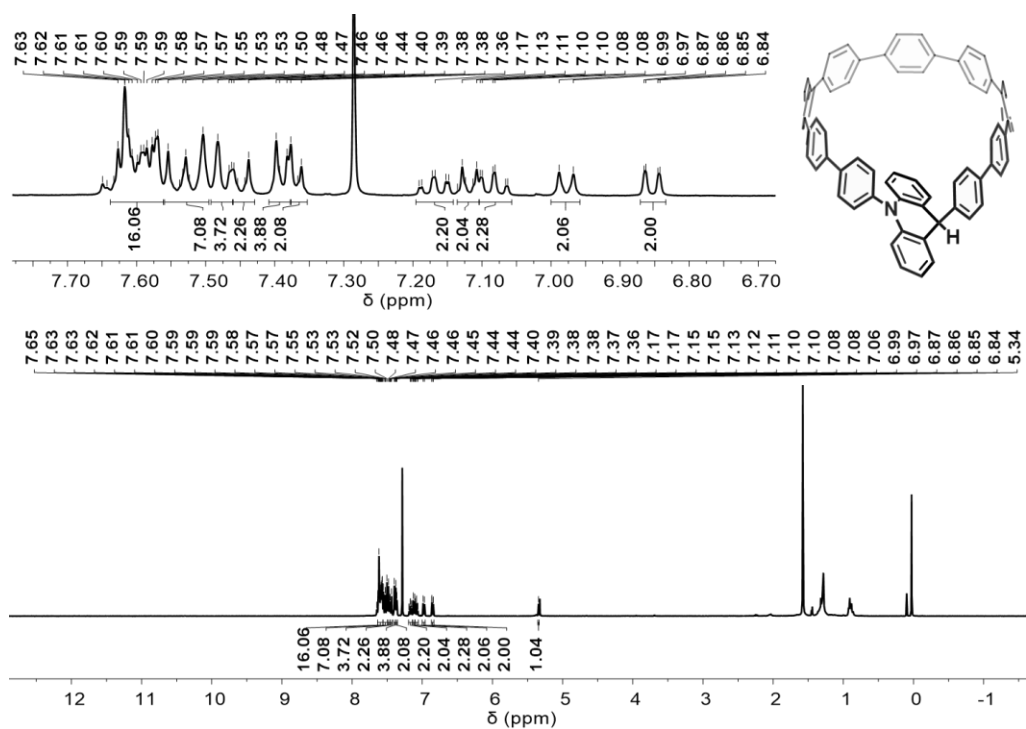

Figure S8.  $^1\text{H}$  NMR spectra of **Ad[10]CPP-H** in  $\text{CDCl}_3$  (298 K, 400 MHz).

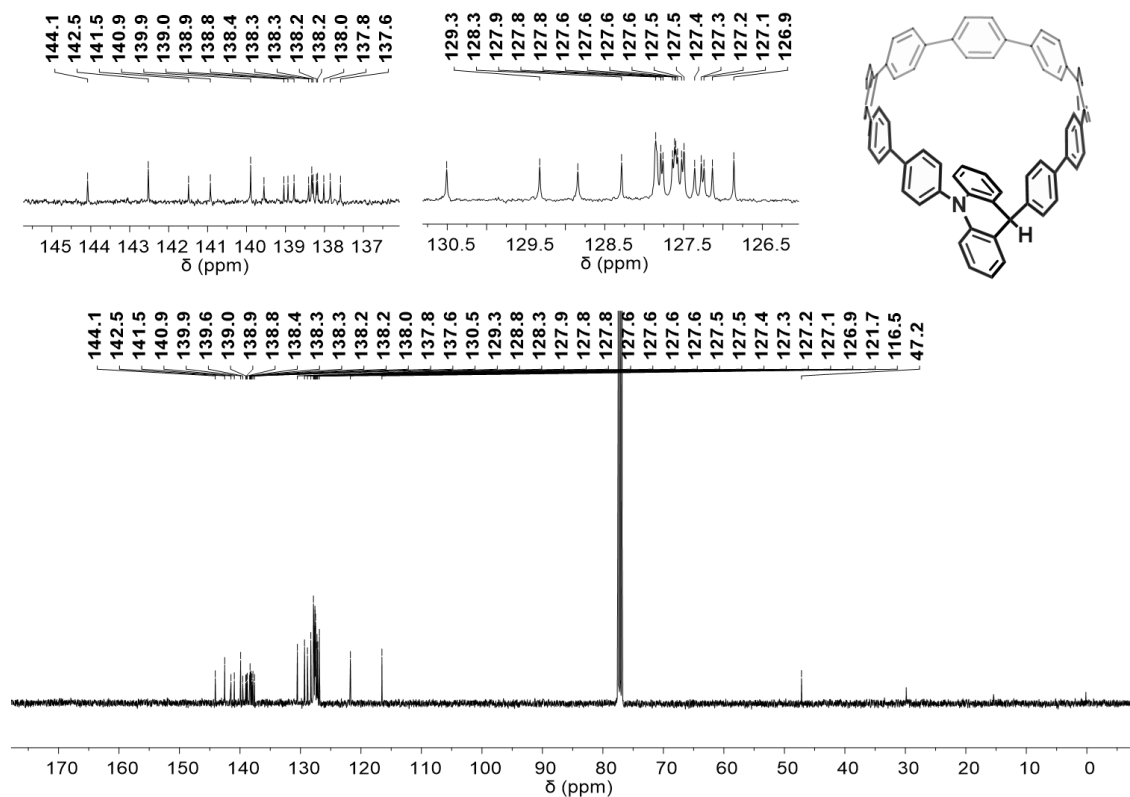

Figure S9.  $^{13}\text{C}$  NMR spectra of Ad[10]CPP-H in  $\text{CDCl}_3$  (298 K, 400 MHz).

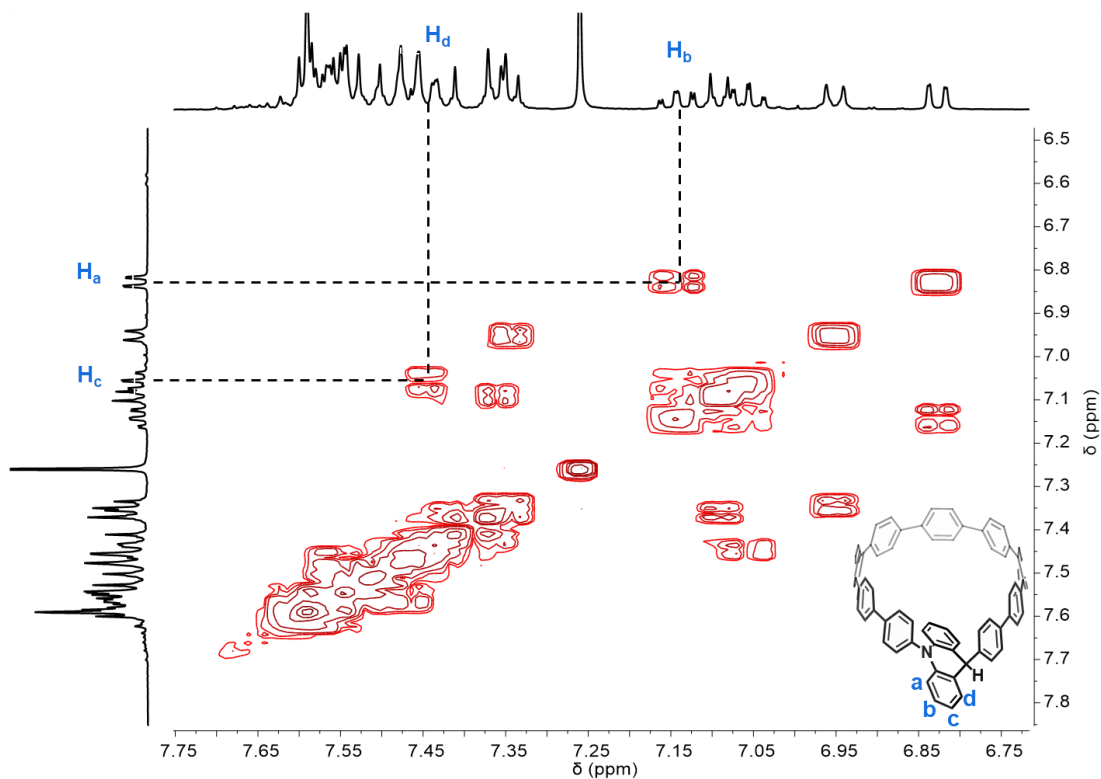

Figure S10.  $^1\text{H}$ - $^1\text{H}$  COSY spectra of Ad[10]CPP-H in  $\text{CDCl}_3$  (298 K, 400 MHz).

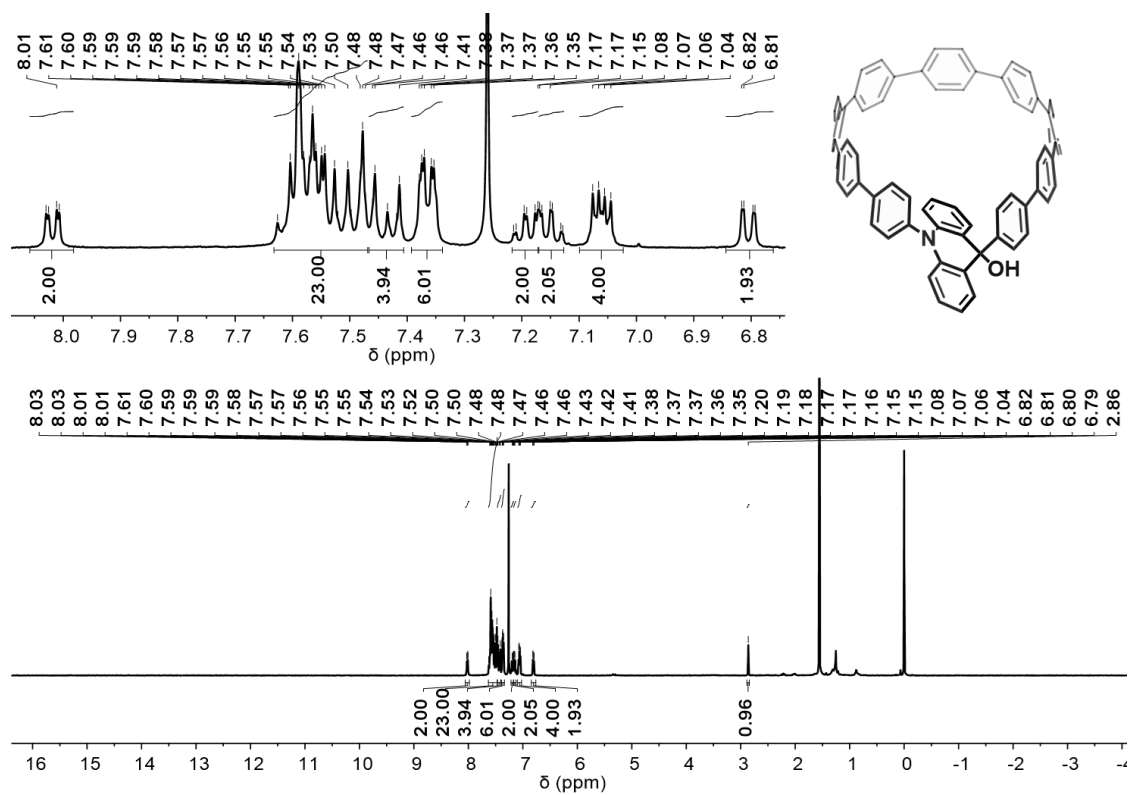

Figure S11.  $^1\text{H}$  NMR spectra of Ad[10]CPP-OH in  $\text{CDCl}_3$  (298 K, 400 MHz).

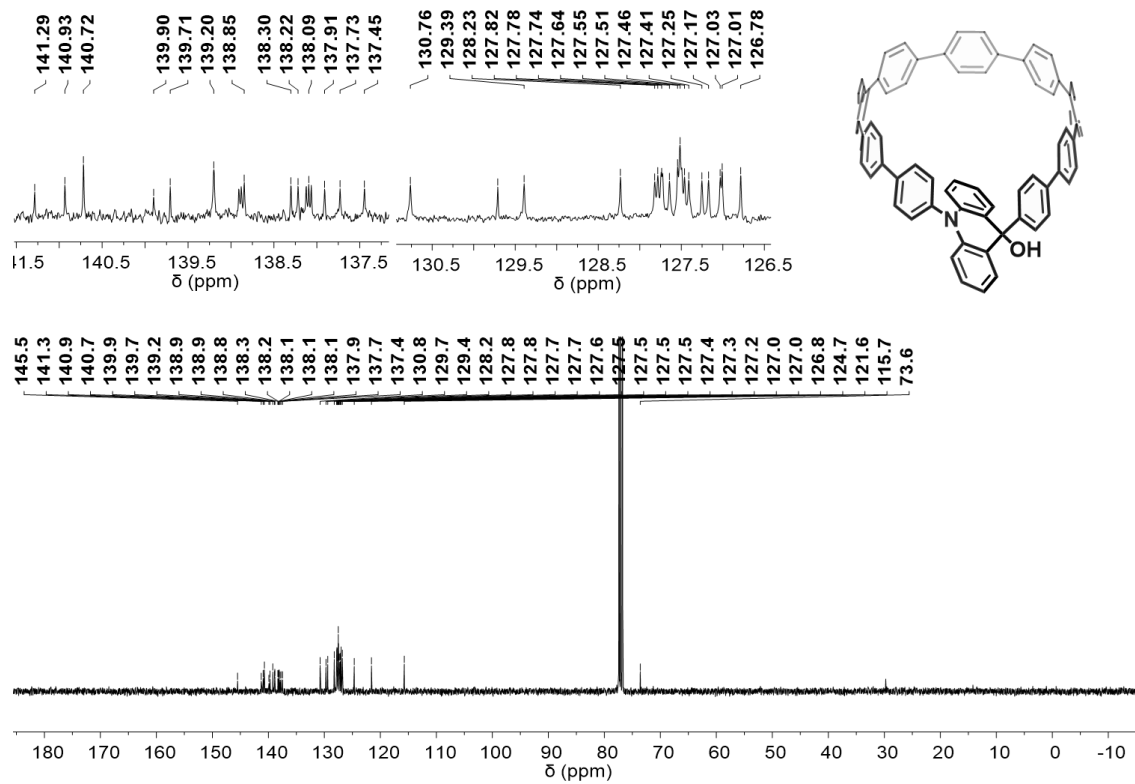

Figure S12.  $^{13}\text{C}$  NMR spectra of Ad[10]CPP-OH in  $\text{CDCl}_3$  (298 K, 101 MHz).

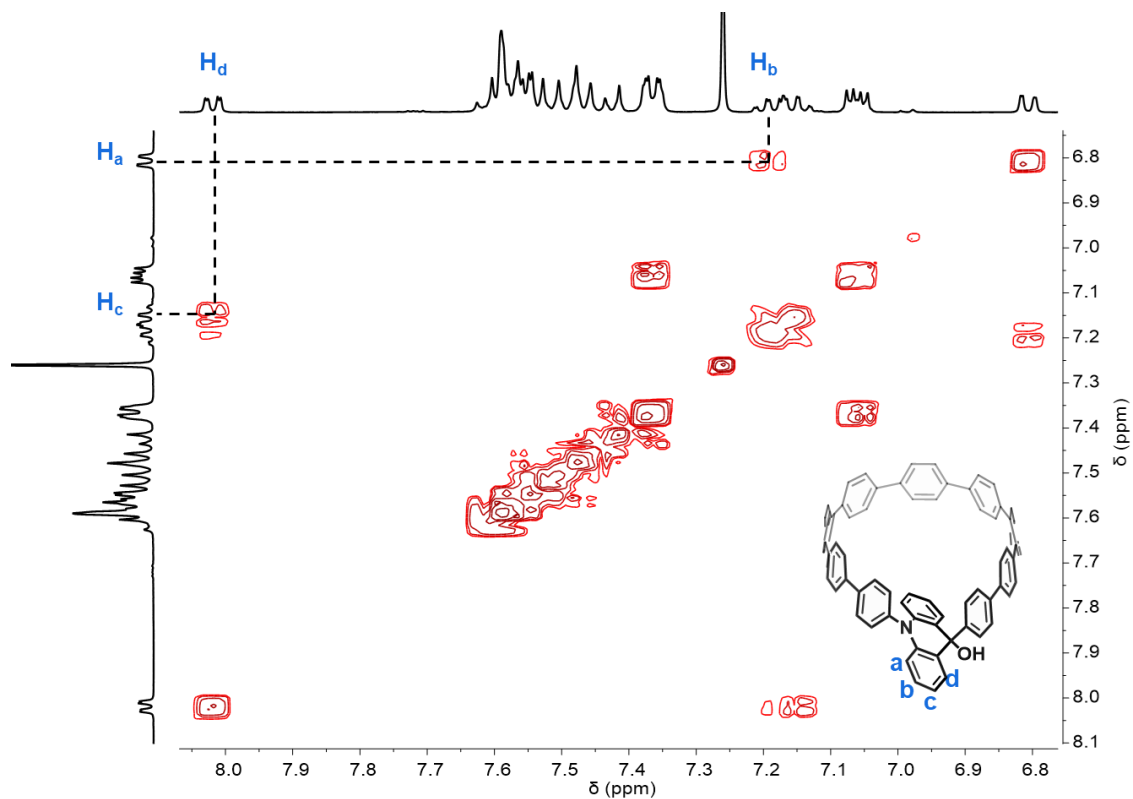

**Figure S13.**  $^1\text{H}$ - $^1\text{H}$  COSY spectra of Ad[10]CPP-OH in  $\text{CDCl}_3$  (298 K, 400 MHz).

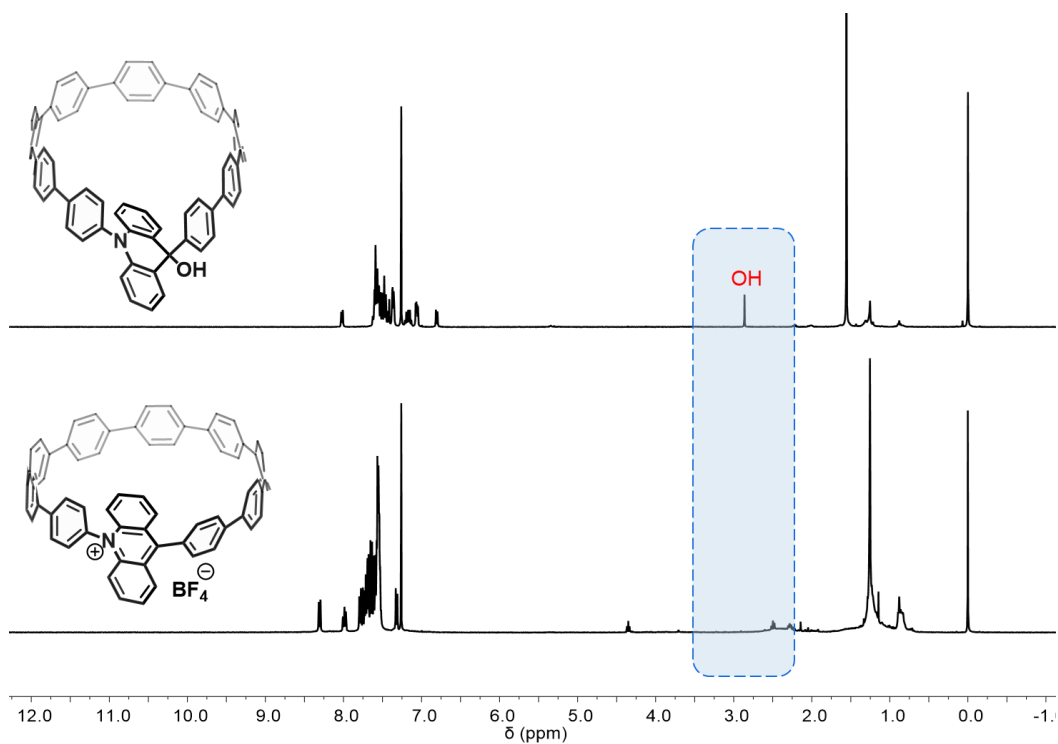

**Figure S14.**  $^1\text{H}$  NMR spectra of Ad[10]CPP-OH before (top) and after (bottom) treatment with an excess of  $\text{HBF}_4$  (40 wt % in water).

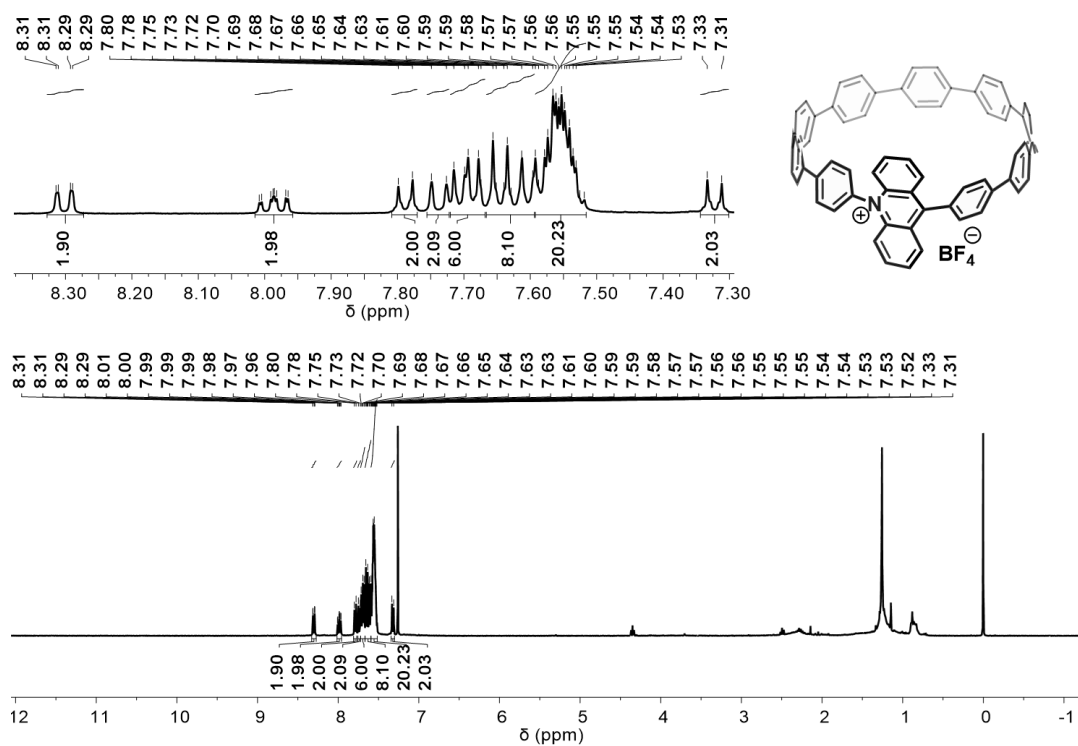

Figure S15.  $^1\text{H}$  NMR spectra of  $\text{Ad}[10]\text{CPP}\cdot\text{BF}_4$  in  $\text{CDCl}_3$  (298 K, 400 MHz).

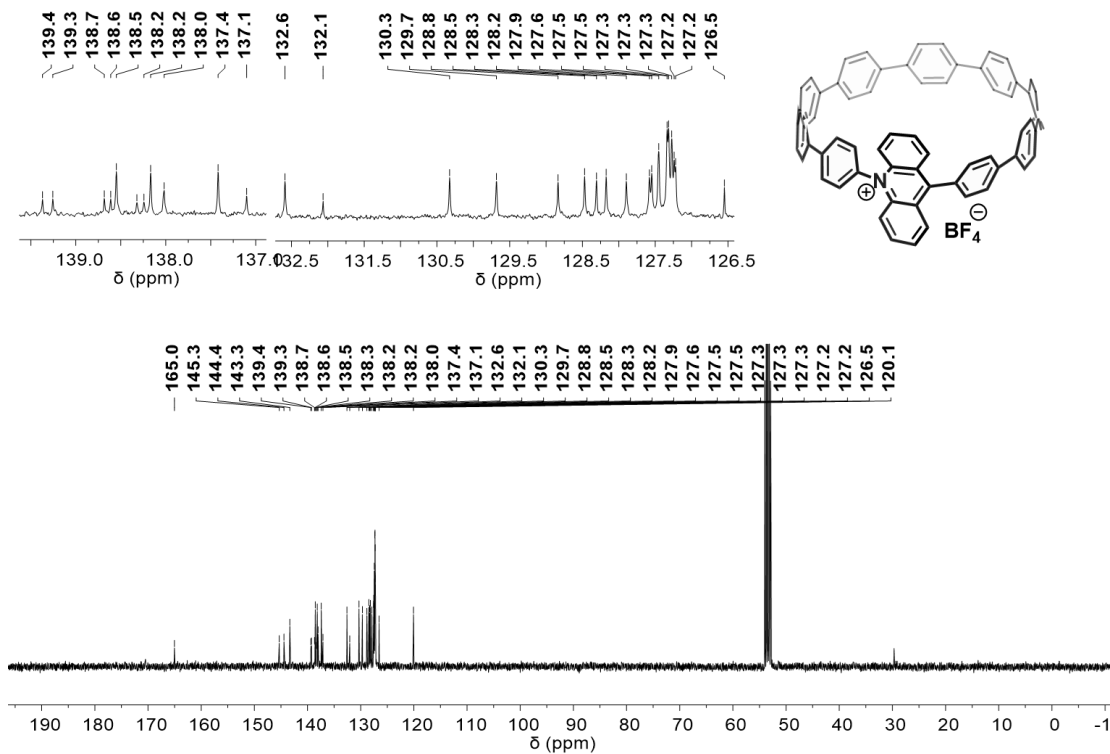

Figure S16.  $^{13}\text{C}$  NMR spectra of  $\text{Ad}[10]\text{CPP}\cdot\text{BF}_4$  in  $\text{CDCl}_3$  (298 K, 101 MHz).

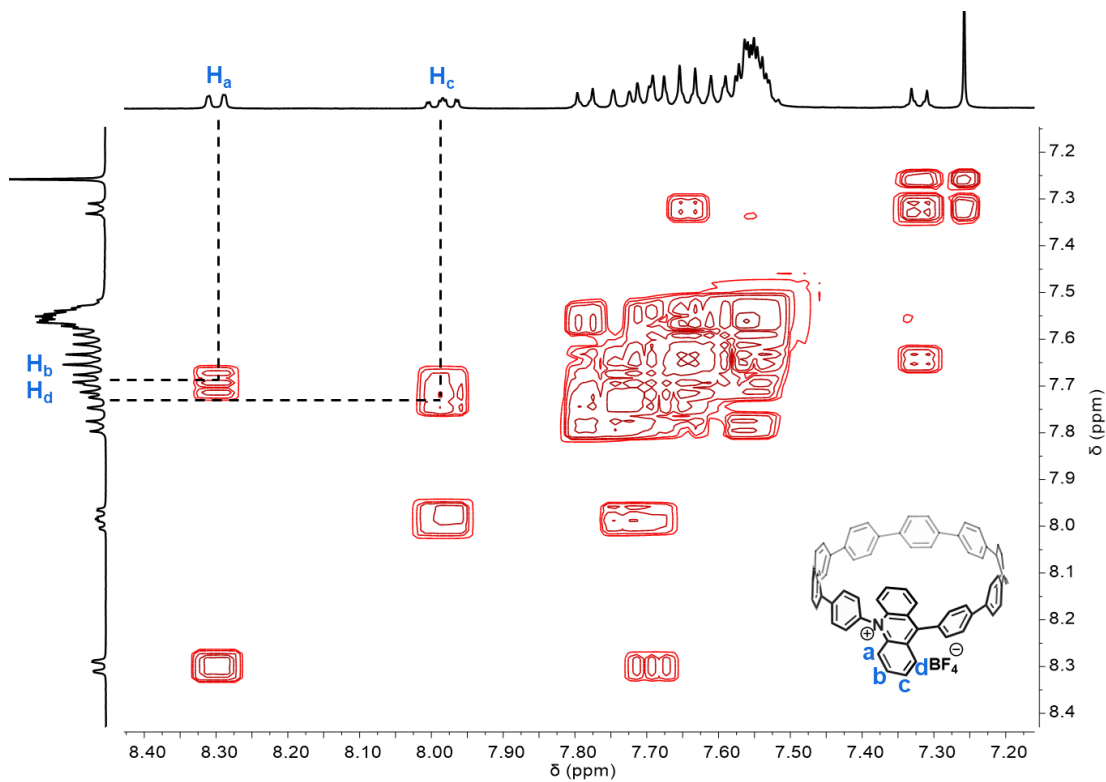

Figure S17.  $^1\text{H}$ - $^1\text{H}$  COSY spectra of Ad[10]CPP·BF<sub>4</sub> in CDCl<sub>3</sub> (298 K, 400 MHz).

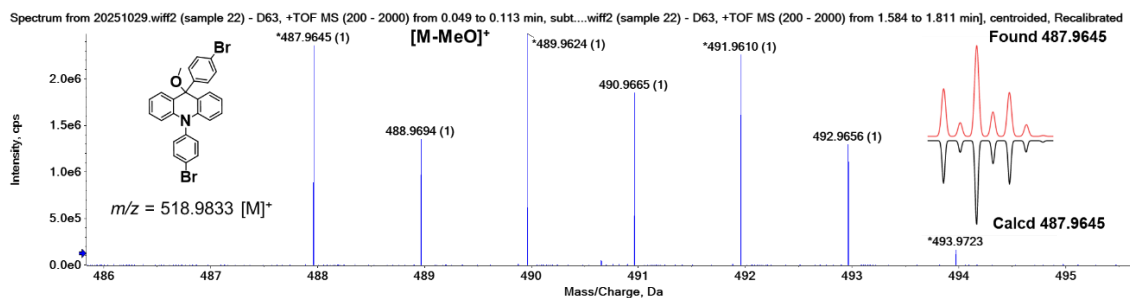

Figure S18. HRMS(ESI) spectrum of **3**.

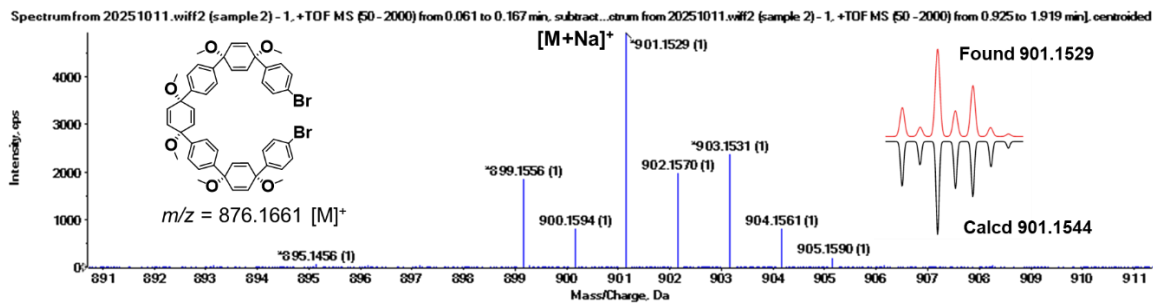

Figure S19. HRMS(ESI) spectrum of **6**(positive ion mode).

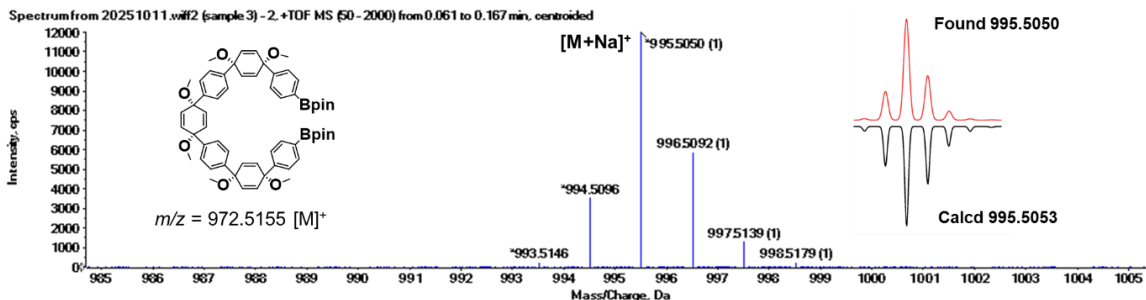

**Figure S20.** HRMS(ESI) spectrum of **7**(positive ion mode).

6.8 Ref MSMS Mode Mass Accuracy ToF2\_mix

Performance

Data: 30001 - ,±%L21[c] 7 Oct 2025 17:09 Cal: 7 Oct 2025 22:08

Shimadzu Biotech Axima Performance 2.9.4.1: Mode Linear, Power: 129, Blanked, P.Ext. @ 863 (bin 57)

%Int. 1.7 mV[sum= 169 mV] Profiles 1-100 Smooth Gauss 2 -Baseline 6

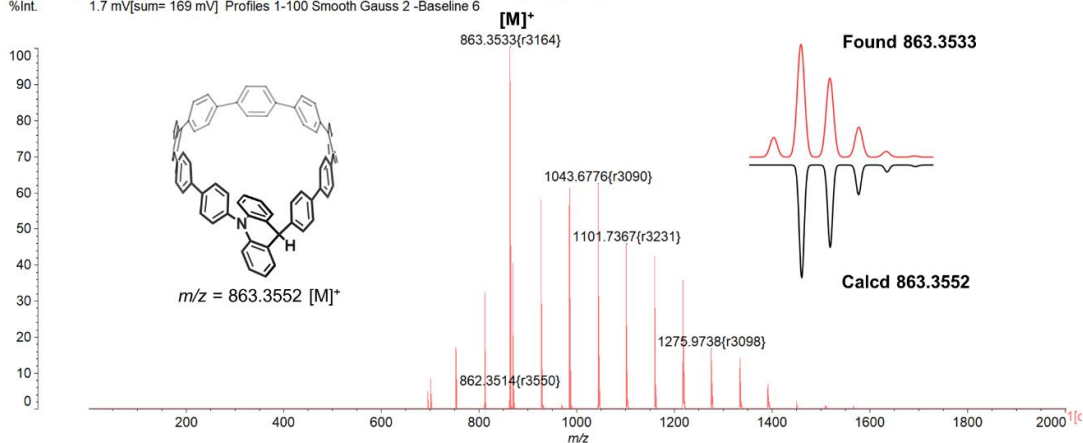

**Figure S21.** MALDI-TOF-MS spectrum of **Ad[10]CPP-H** (matrix: DCTB, internal standard: PPG, cationization agent: KI, linear mode).

6.8 Ref MSMS Mode Mass Accuracy ToF2\_mix

Performance

Data: 10001 - ,±%K20[c] 7 Oct 2025 17:19 Cal: 28 Oct 2025 10:13

Shimadzu Biotech Axima Performance 2.9.4.1: Mode Linear, Power: 135, Blanked, P.Ext. @ 879 (bin 57)

%Int. 6.5 mV[sum= 648 mV] Profiles 1-100 Smooth Gauss 2 -Baseline 6

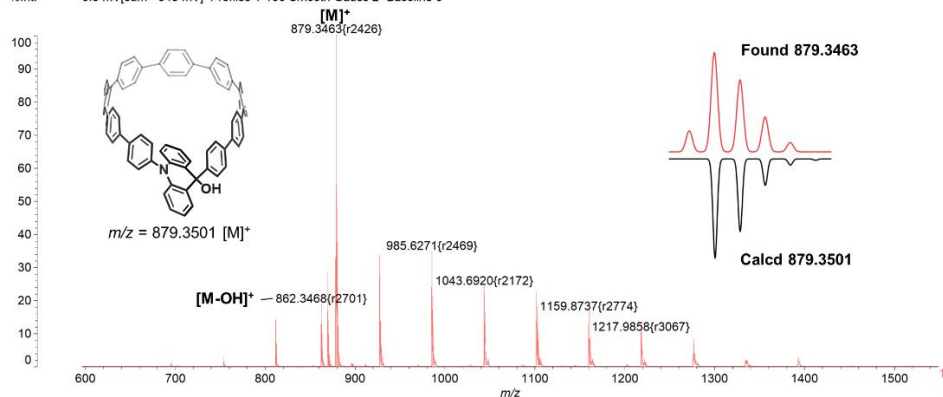

**Figure S22.** MALDI-TOF-MS spectrum of **Ad[10]CPP-OH** (matrix: DCTB, internal standard: PPG, cationization agent: KI, linear mode).

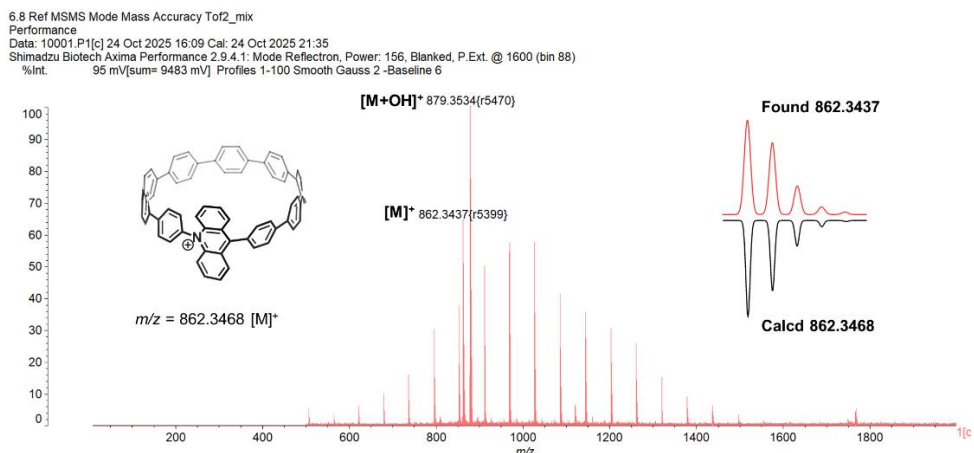

**Figure S23.** MALDI-TOF-MS spectrum of Ad[10]CPP·TFA (matrix: HABA, internal standard: PPG, reflectron mode).

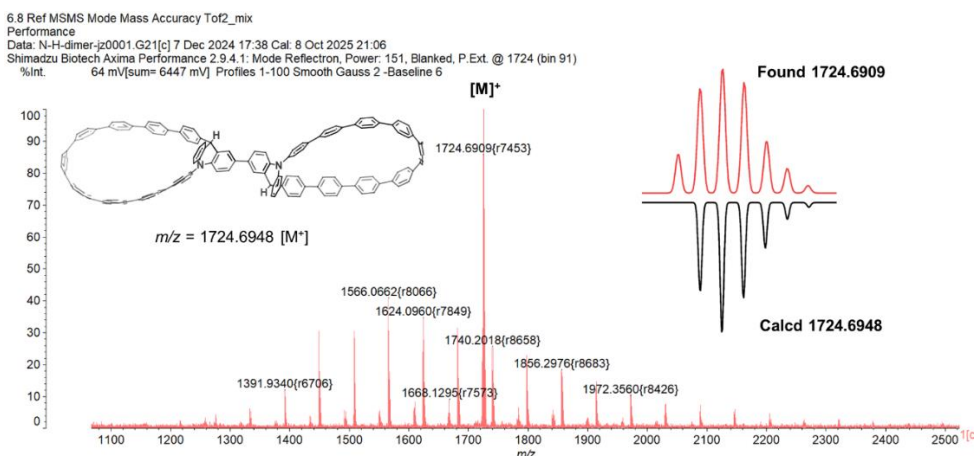

**Figure S24.** MALDI-TOF-MS spectrum of possible Ad[10]CPP-dimer captured (matrix: DCTB, internal standard: PPG, cationization agent: KI, reflectron mode)

#### 4. Photophysical properties for Ad[10]CPP (UV, FL, PLQY and Fluorescence lifetime)

Table S1 Summary of experimental photophysical properties for Ad[10]CPP

| Ad[10]CPP     | Absorbance (nm) | Extinction coefficient $\epsilon$ ( $M^{-1} \text{ cm}^{-1}$ ) | Fluorescence (nm) | Fluorescence quantum yield $\Phi$ | Singlet lifetime (ns) |
|---------------|-----------------|----------------------------------------------------------------|-------------------|-----------------------------------|-----------------------|
| Ad[10]CPP-H   | 326, 378        | $7.3 \times 10^4$                                              | 467               | 0.71                              | 2.48                  |
| Ad[10]CPP-OH  | 326, 378        | $7.5 \times 10^4$                                              | 465               | 0.67                              | 2.40                  |
| Ad[10]CPP·TFA | 332, 365, 474   | $6.8 \times 10^4$                                              | 435               | 0.01                              | 1.88                  |

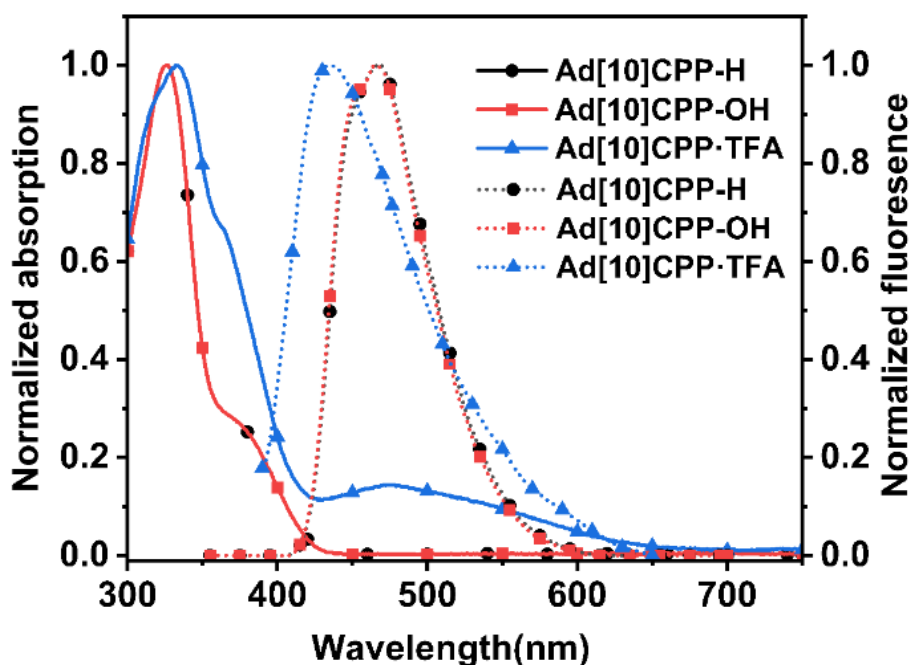

**Figure S25.** UV-vis absorption (solid line) and fluorescence emission (dotted line) spectra of Ad[10]CPP-H ( $\lambda_{\text{ex}} = 325$  nm) (black circle), Ad[10]CPP-OH ( $\lambda_{\text{ex}} = 325$  nm) (red square), and Ad[10]CPP·TFA ( $\lambda_{\text{ex}} = 370$  nm) (blue triangle) measured in  $\text{CH}_2\text{Cl}_2$  solutions ( $1 \times 10^{-5}$  M) at room temperature. The Ad[10]CPP·TFA sample is prepared by adding excess trifluoroacetic acid into Ad[10]CPP-OH, with the acid concentration maintained at  $1 \times 10^{-3}$  M.

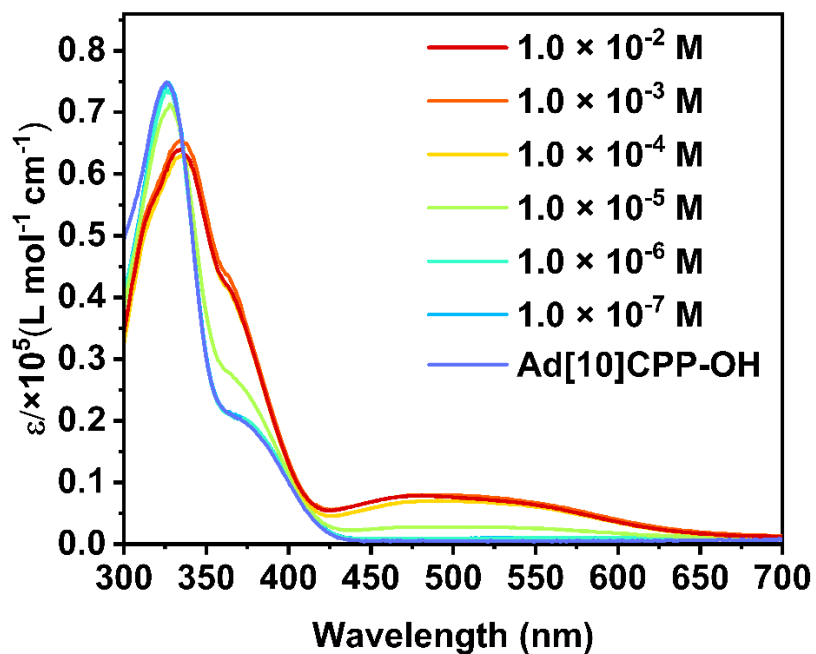

**Figure S26.** UV-vis spectra of Ad[10]CPP-OH in  $\text{CH}_2\text{Cl}_2$  solutions ( $1 \times 10^{-5}$  M) at room temperature with the addition of  $\text{CF}_3\text{COOH}$  at different concentrations.

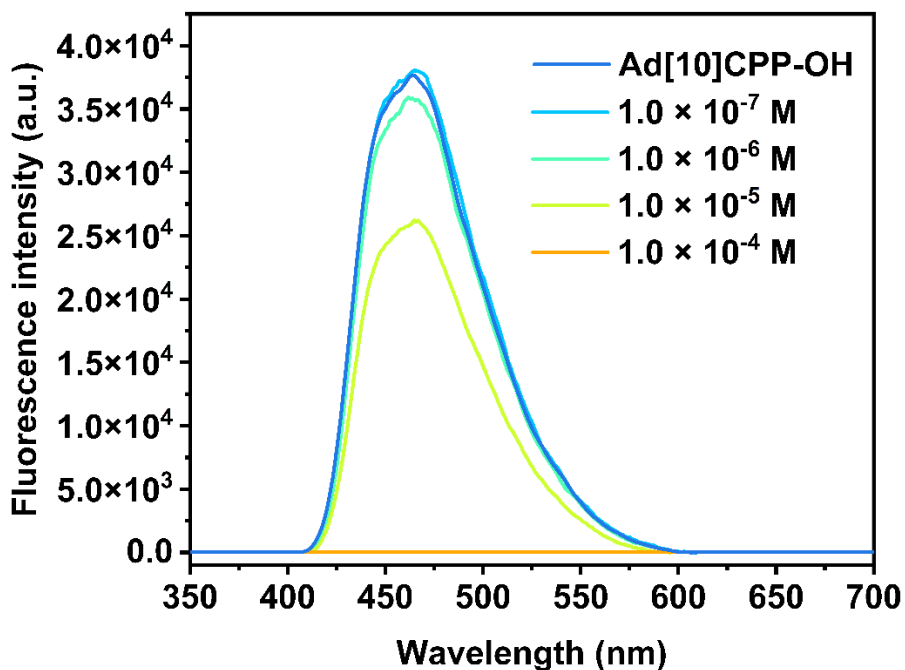

**Figure S27.** Fluorescence intensity changes of Ad[10]CPP-OH in  $\text{CH}_2\text{Cl}_2$  ( $1 \times 10^{-5}$  M) at room temperature ( $\lambda_{\text{ex}} = 327$  nm) with the addition of  $\text{CF}_3\text{COOH}$  at different concentrations.

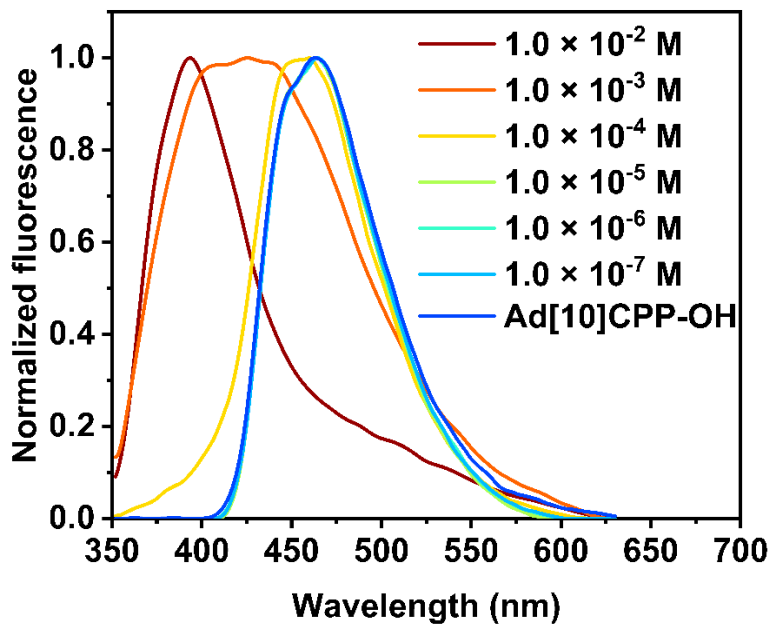

**Figure S28.** Normalized fluorescence emission spectra of Ad[10]CPP-OH ( $\lambda_{\text{ex}} = 327$  nm) in  $\text{CH}_2\text{Cl}_2$  solutions ( $1 \times 10^{-5}$  M) at room temperature with the addition of  $\text{CF}_3\text{COOH}$  at different concentrations.

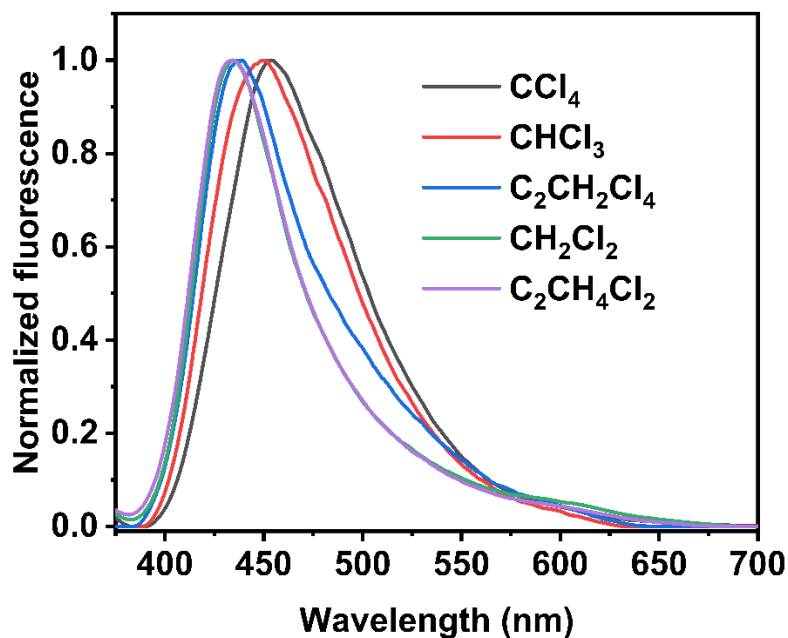

**Figure S29.** Normalized fluorescence emission spectra of Ad[10]CPP-OH ( $\lambda_{\text{ex}} = 360$  nm) in various solvents ( $1 \times 10^{-4}$  M) at room temperature, with the addition of  $\text{CF}_3\text{COOH}$  (acid concentration:  $1 \times 10^{-3}$  M).

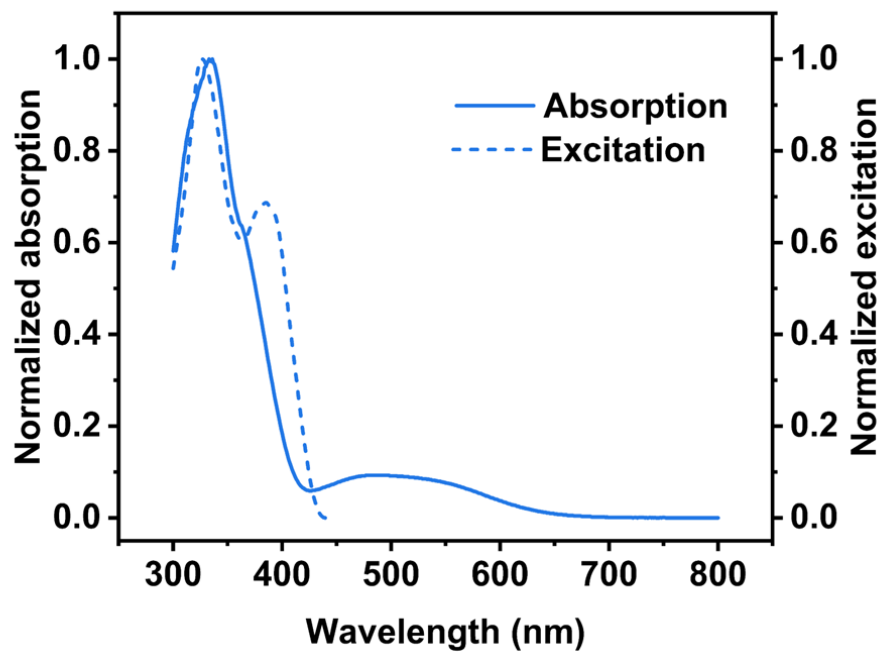

**Figure S30.** Absorption and excitation spectra ( $\lambda_{em}= 459$  nm) of Ad[10]CPP·TFA in  $\text{CH}_2\text{Cl}_2$  solutions ( $1 \times 10^{-5}$  M) at room temperature (with an acid concentration of  $1 \times 10^{-4}$  M).

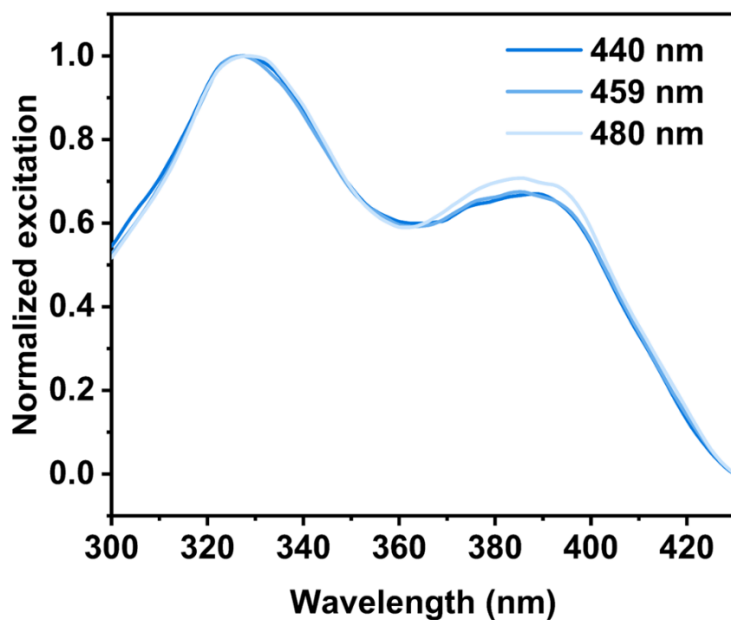

**Figure S31.** Excitation spectra of Ad[10]CPP·TFA measured ( $\lambda_{em}= 440$  nm, 459 nm, 480 nm) in  $\text{CH}_2\text{Cl}_2$  solutions ( $1 \times 10^{-5}$  M) at room temperature (with an acid concentration of  $1 \times 10^{-4}$  M).

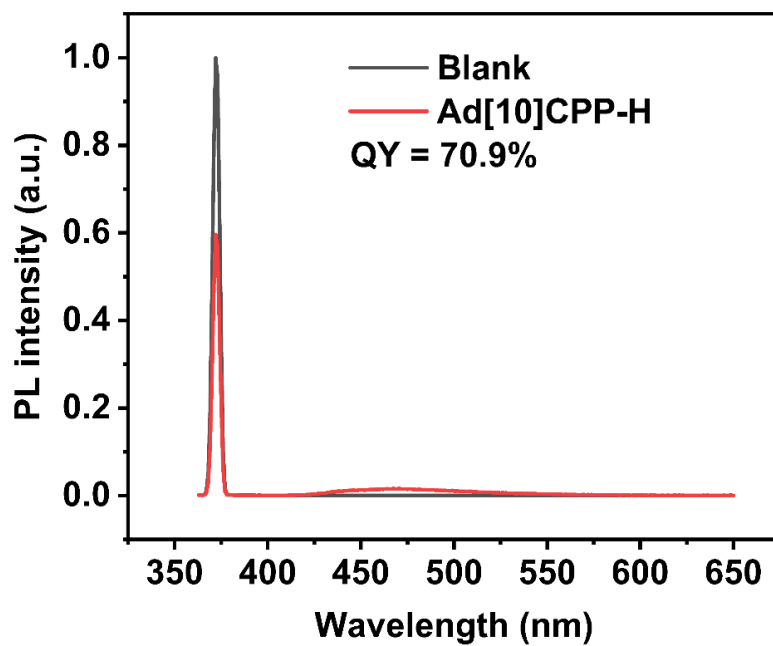

Figure S32. PLQY spectra of Ad[10]CPP-H in CH<sub>2</sub>Cl<sub>2</sub> solutions ( $1 \times 10^{-5}$  M) at room temperature.

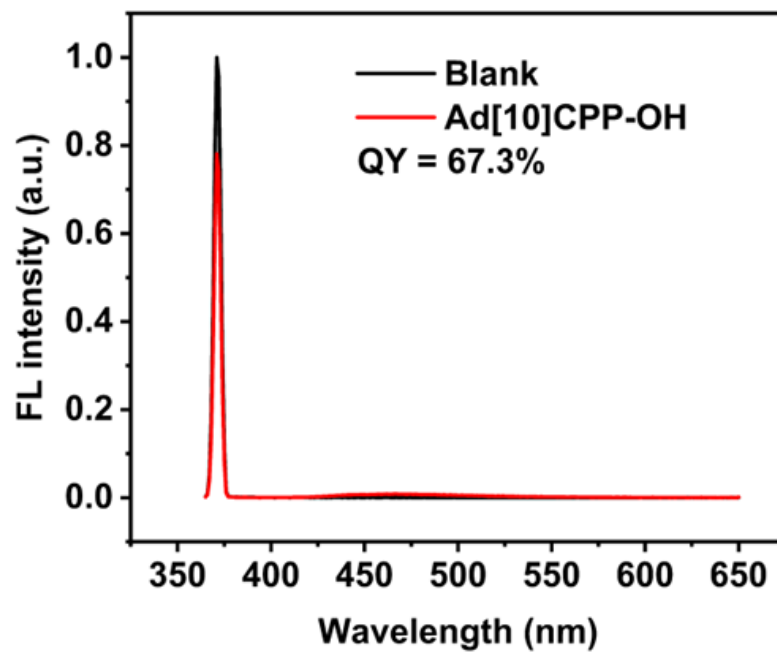

Figure S33. PLQY spectra of Ad[10]CPP-OH in CH<sub>2</sub>Cl<sub>2</sub> solutions ( $1 \times 10^{-5}$  M) at room temperature.

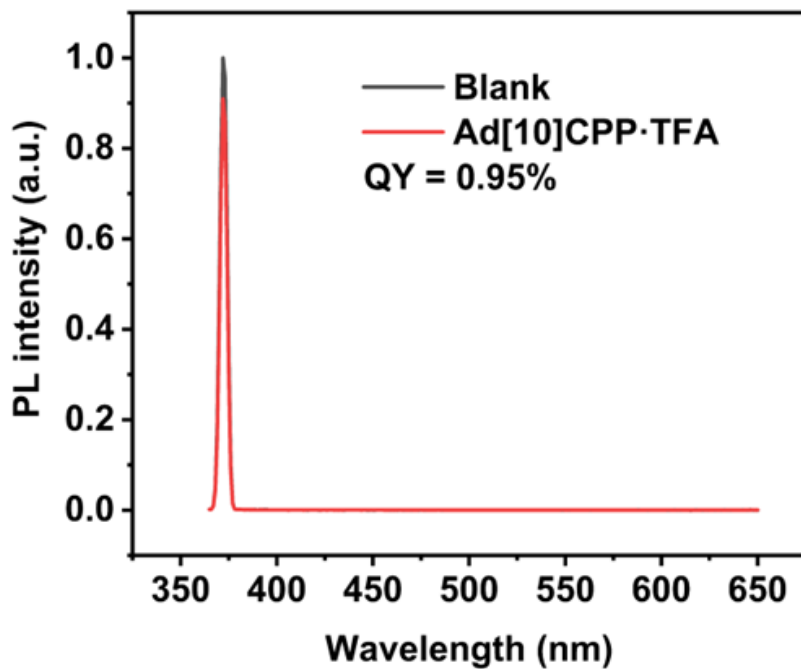

**Figure S34.** PLQY spectra of Ad[10]CPP·TFA in CH<sub>2</sub>Cl<sub>2</sub> solutions ( $1 \times 10^{-5}$  M) at room temperature.

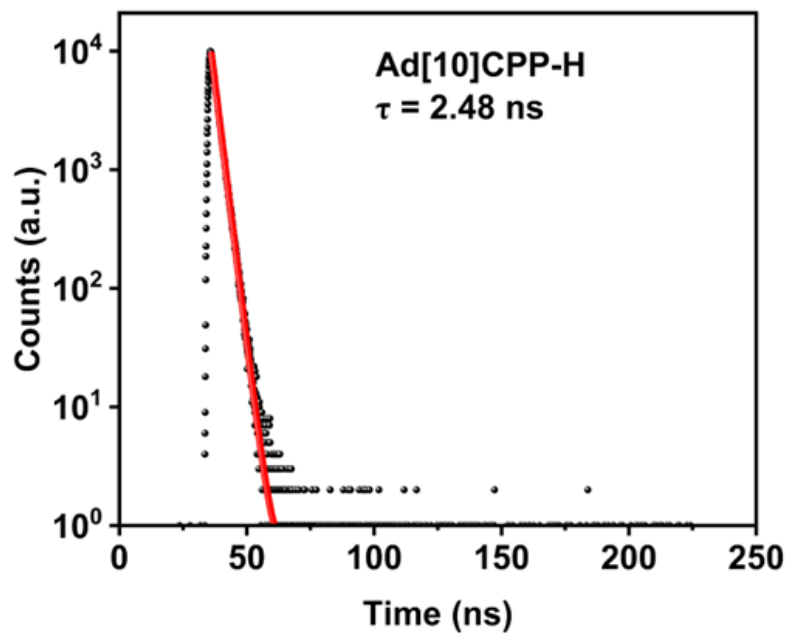

**Figure S35.** Fluorescence decay profiles of Ad[10]CPP-H measured at 458 nm in CH<sub>2</sub>Cl<sub>2</sub> solution ( $1 \times 10^{-5}$  M, room temperature). Data was acquired by time-resolved fluorescence spectroscopy.

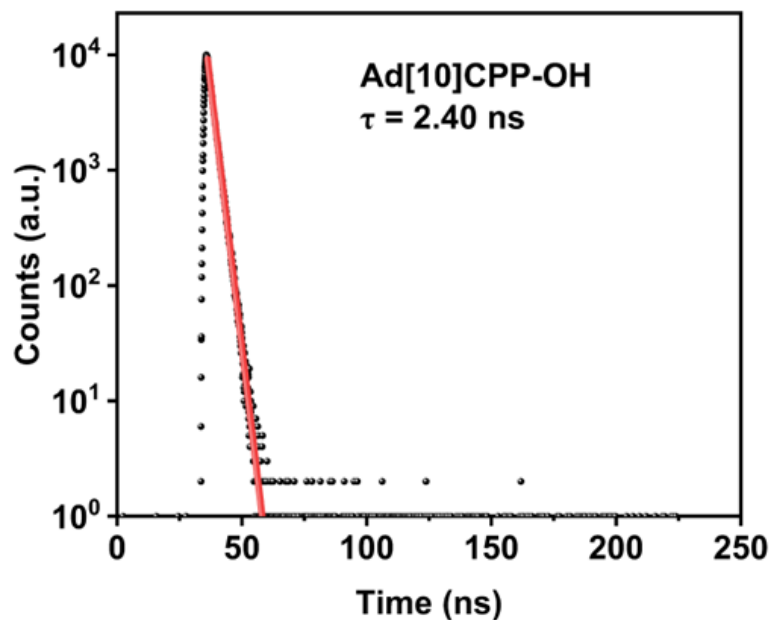

**Figure S36.** Fluorescence decay profiles of Ad[10]CPP-OH measured at 458 nm in  $\text{CH}_2\text{Cl}_2$  solution ( $1 \times 10^{-5}$  M, room temperature). Data was acquired by time-resolved fluorescence spectroscopy.

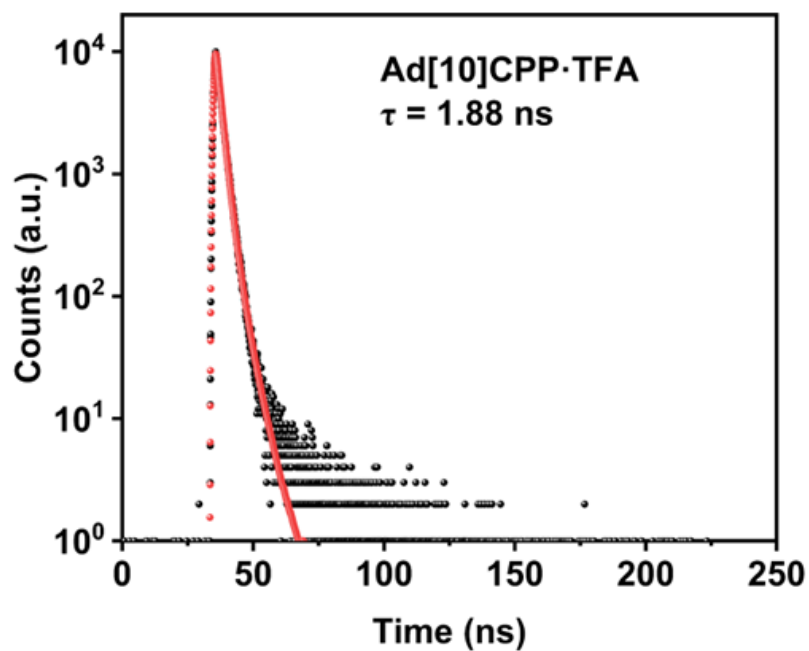

**Figure S37.** Fluorescence decay profiles of Ad[10]CPP-TFA measured at 435 nm in  $\text{CH}_2\text{Cl}_2$  solution ( $1 \times 10^{-5}$  M, room temperature). Data was acquired by time-resolved fluorescence spectroscopy.

The radiative decay constants ( $k_r$ ) and non-radiative decay constants ( $k_{nr}$ ) are calculated by means of the following relations:

$$k_r = \Phi_F/\tau \text{ and } k_{nr} = (1 - \Phi_F)/\tau.$$

$\Phi_F$  is the fluorescence quantum yield,  $\tau$  is the lifetime of the excited state.

From the estimated fluorescence quantum yield ( $\Phi_F$ ) and  $\tau$  values, the radiative decay constants ( $k_r$ ) are calculated to be  $2.86 \times 10^8 \text{ s}^{-1}$  for **Ad[10]CPP-H**,  $2.80 \times 10^8 \text{ s}^{-1}$  for **Ad[10]CPP-OH**, and  $5.1 \times 10^6 \text{ s}^{-1}$  for **Ad[10]CPP<sup>+</sup>**. The non-radiative decay constants ( $k_{nr}$ ) are calculated to be  $1.17 \times 10^8 \text{ s}^{-1}$  for **Ad[10]CPP-H**,  $1.36 \times 10^8 \text{ s}^{-1}$  for **Ad[10]CPP-OH**, and  $5.3 \times 10^8 \text{ s}^{-1}$  for **Ad[10]CPP<sup>+</sup>**,

## 5. Electrochemical Characterization (CV and DPV)

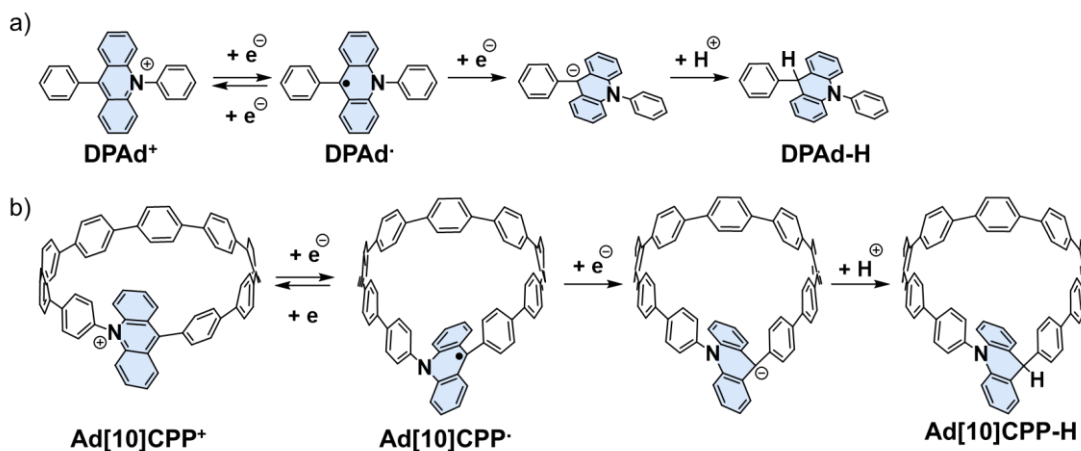

**Figure S38.** The stepwise reduction mechanism diagram of the a) DPAd<sup>+</sup> and b) Ad[10]CPP<sup>+</sup>.

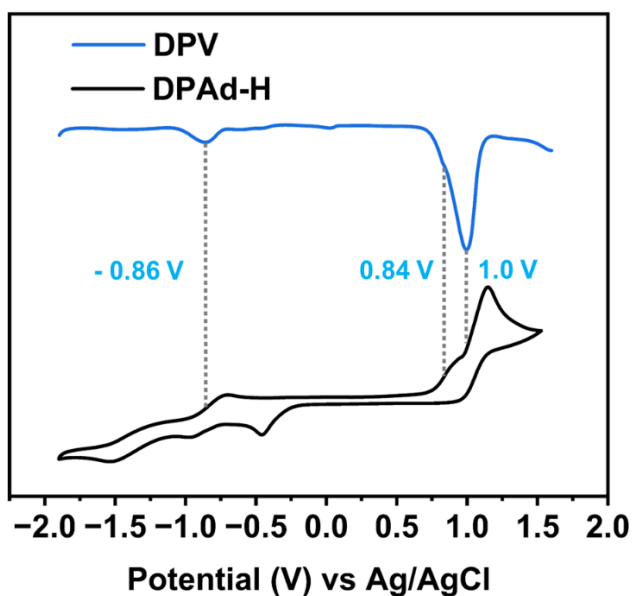

**Figure S39.** Cyclic voltammogram and differential pulse voltammogram of 2.0 mM DPAd-H in CH<sub>2</sub>Cl<sub>2</sub> solution (V vs Ag/AgCl, in 0.1 M n-Bu<sub>4</sub>NPF<sub>6</sub> / CH<sub>2</sub>Cl<sub>2</sub>, scan rate: 100 mV/s for CV, room temperature).

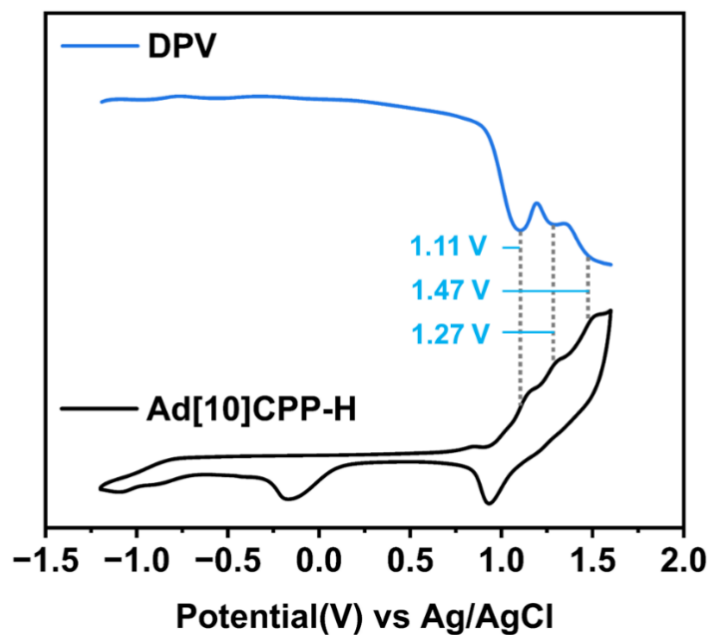

**Figure S40.** Cyclic voltammogram and differential pulse voltammogram of 1.0 mM Ad[10]CPP-H in CH<sub>2</sub>Cl<sub>2</sub> (V vs Ag/AgCl, in 0.1 M n-Bu<sub>4</sub>NPF<sub>6</sub> / CH<sub>2</sub>Cl<sub>2</sub>, scan rate: 100 mV/s for CV, room temperature)

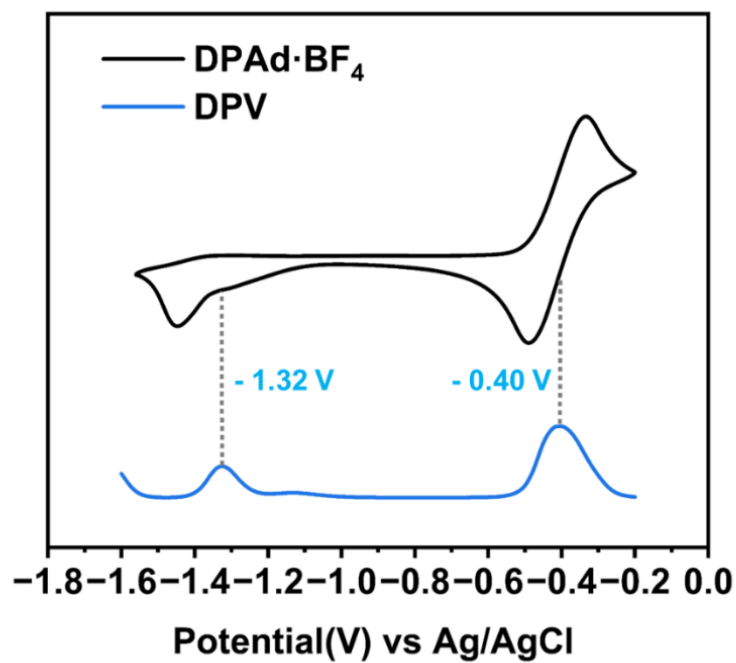

**Figure S41.** Cyclic voltammogram and differential pulse voltammogram of 1.0 mM DPAd·BF<sub>4</sub> (V vs Ag/AgCl, in 0.1 M n-Bu<sub>4</sub>NPF<sub>6</sub> / CH<sub>2</sub>Cl<sub>2</sub>, scan rate: 100 mV/s for CV, room temperature)

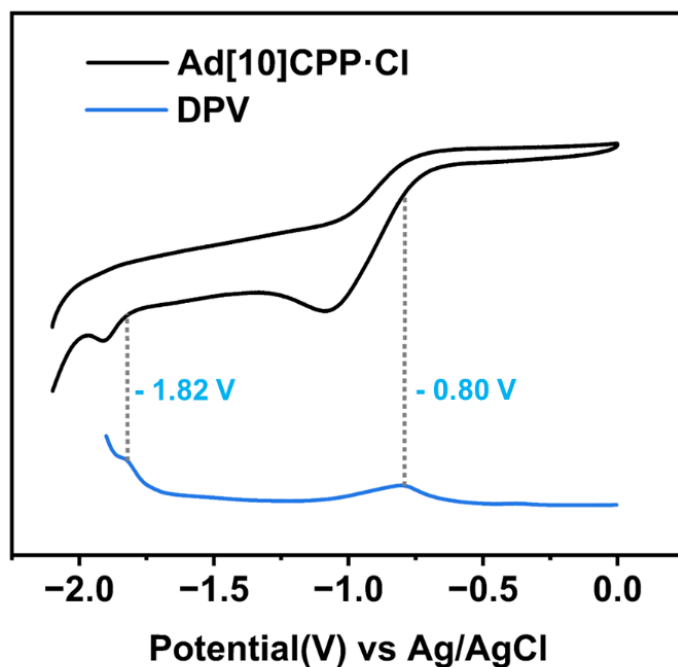

**Figure S42.** Cyclic voltammogram and differential pulse voltammogram of 1.0 mM Ad[10]CPP·Cl in CH<sub>3</sub>CN solution (V vs Ag/AgCl, in 0.1 M n-Bu<sub>4</sub>NBF<sub>4</sub> / CH<sub>3</sub>CN, scan rate: 100 mV/s for CV, room temperature).

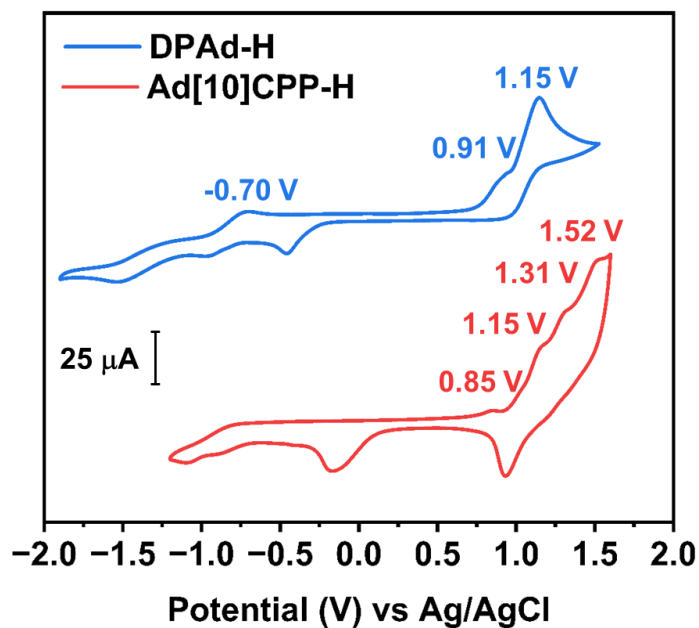

**Figure S43.** Comparison diagram of Cyclic voltammograms of 2.0 mM DPAd-H and 1.0 mM Ad[10]CPP-H in CH<sub>2</sub>Cl<sub>2</sub> solution (V vs Ag/AgCl, in 0.1 M n-Bu<sub>4</sub>NPF<sub>6</sub> / CH<sub>2</sub>Cl<sub>2</sub>, scan rate: 100 mV/s for CV, room temperature).

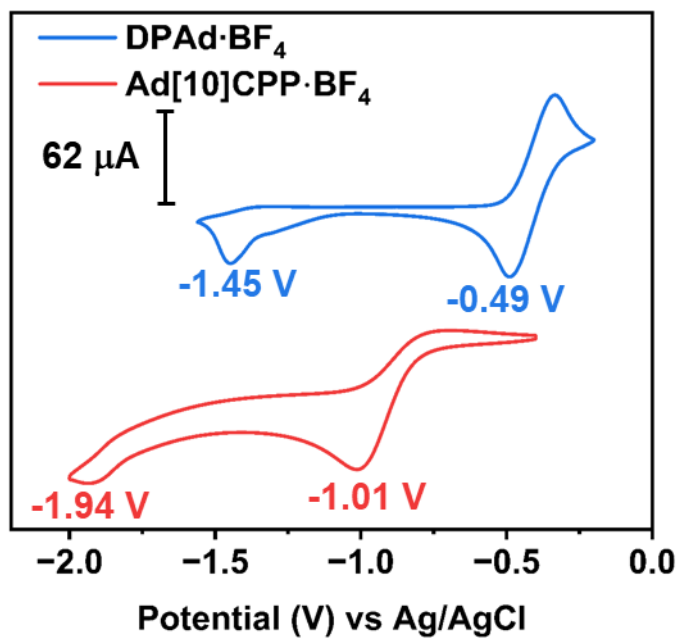

**Figure S44.** Comparison diagram of Cyclic voltammograms of 1.0 mM **DPAd·BF<sub>4</sub>** in CH<sub>2</sub>Cl<sub>2</sub> solution (V vs Ag/AgCl, in 0.1 M n-Bu<sub>4</sub>NPF<sub>6</sub> / CH<sub>2</sub>Cl<sub>2</sub> scan rate: 100 mV/s for CV, room temperature) and **Ad[10]CPP·BF<sub>4</sub>** in CH<sub>3</sub>CN solution (V vs Ag/AgCl, in 0.1 M n-Bu<sub>4</sub>NBF<sub>4</sub> / CH<sub>3</sub>CN, scan rate: 100 mV/s for CV, room temperature).

## 6. Chemical Oxidation Experiments (UV-vis-IR, EPR)

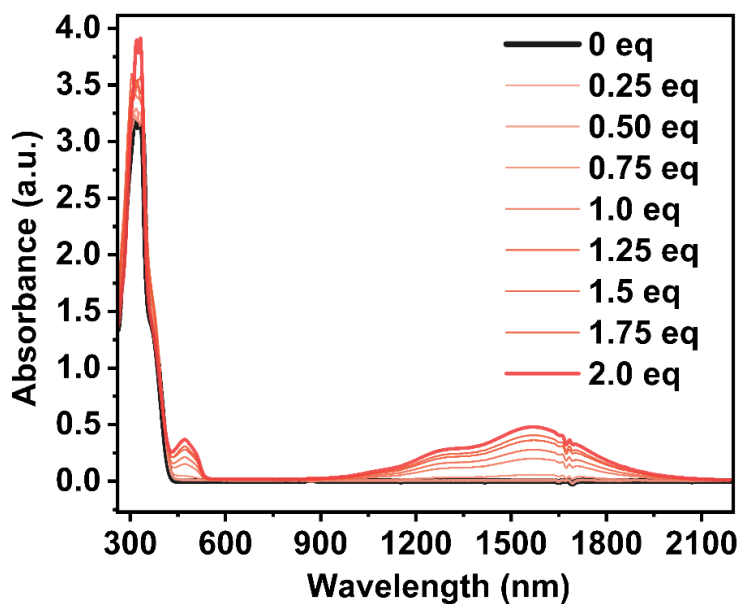

**Figure S45.** UV-vis-NIR absorption spectra of Ad[10]CPP-H and Ad[10]CPP-H with 0 to 2 equivalents of NOBF<sub>4</sub> in CH<sub>2</sub>Cl<sub>2</sub> solutions ( $5 \times 10^{-4}$  M).

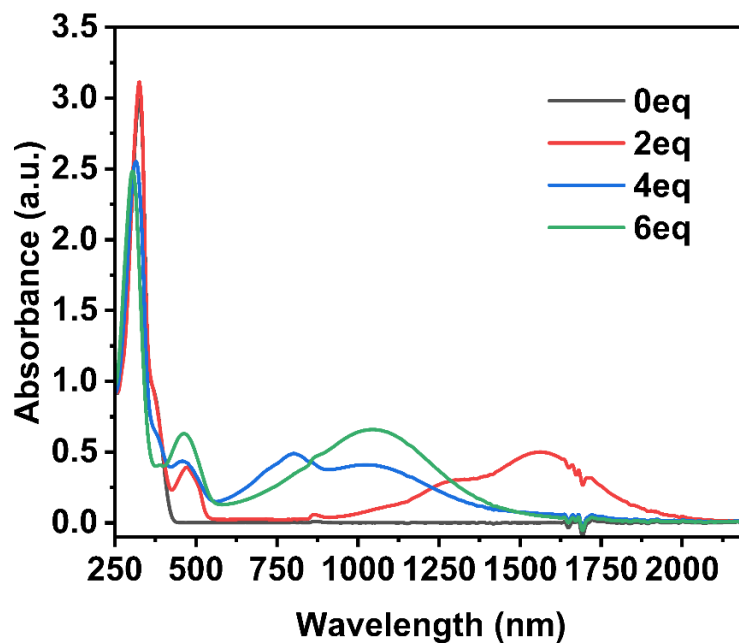

**Figure S46.** UV-vis-NIR absorption spectra of Ad[10]CPP-H and Ad[10]CPP-H with 0 to 6 equivalents of NOBF<sub>4</sub> in CH<sub>2</sub>Cl<sub>2</sub> solutions ( $5 \times 10^{-4}$  M).

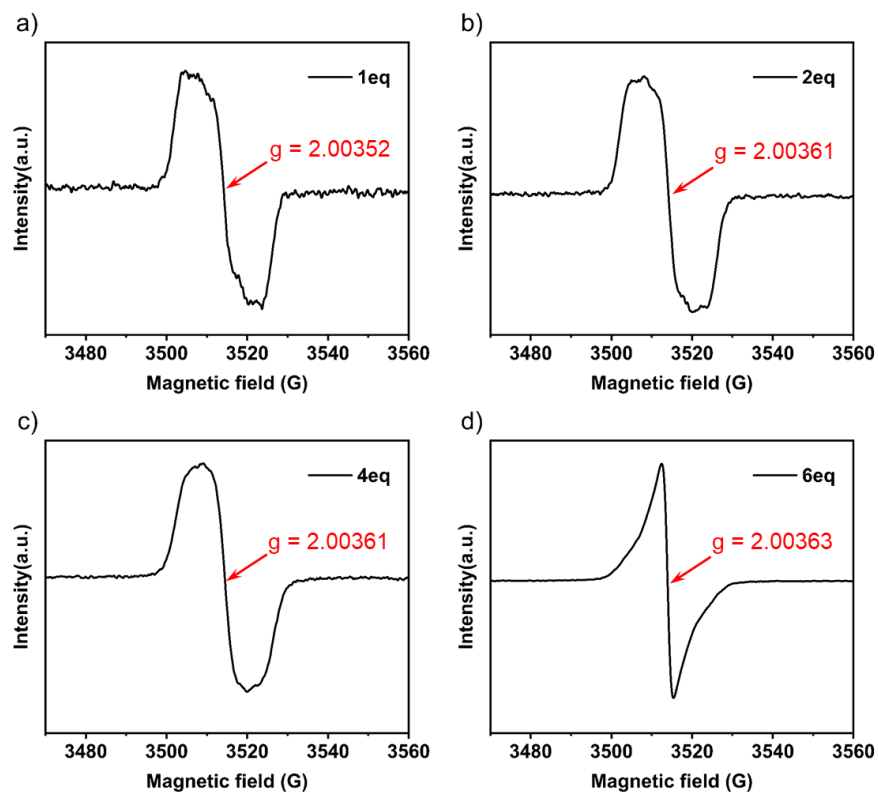

**Figure S47.** EPR spectra of the oxidation of Ad[10]CPP-H by 1 to 6 equivalents of NOBF<sub>4</sub> in CH<sub>2</sub>Cl<sub>2</sub> solutions. ( $2 \times 10^{-3}$  M).

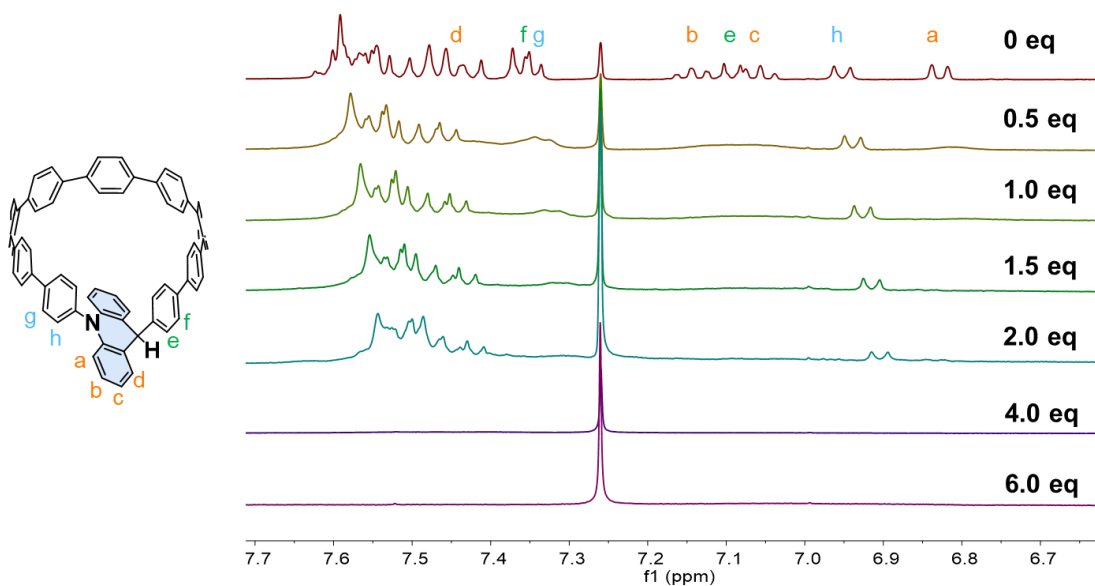

**Figure S48.** Partial <sup>1</sup>H NMR spectra of the oxidation of Ad[10]CPP-H by 0 to 6 equivalents of NOBF<sub>4</sub> in CDCl<sub>3</sub> solutions ( $2 \times 10^{-3}$  M).

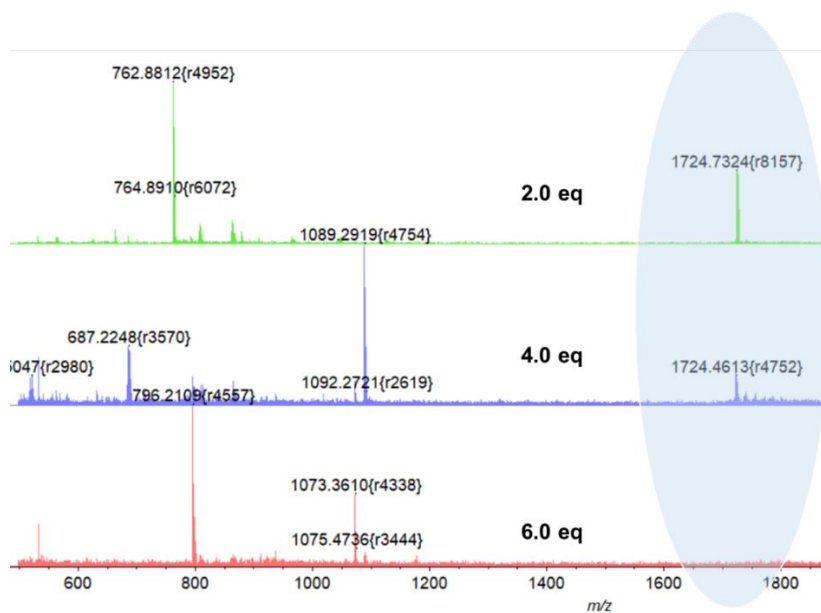

**Figure S49.** MALDI-TOF-MS spectrum of the oxidation of Ad[10]CPP-H by 2 to 6 equivalents of NOBF<sub>4</sub> in CH<sub>2</sub>Cl<sub>2</sub> solution.

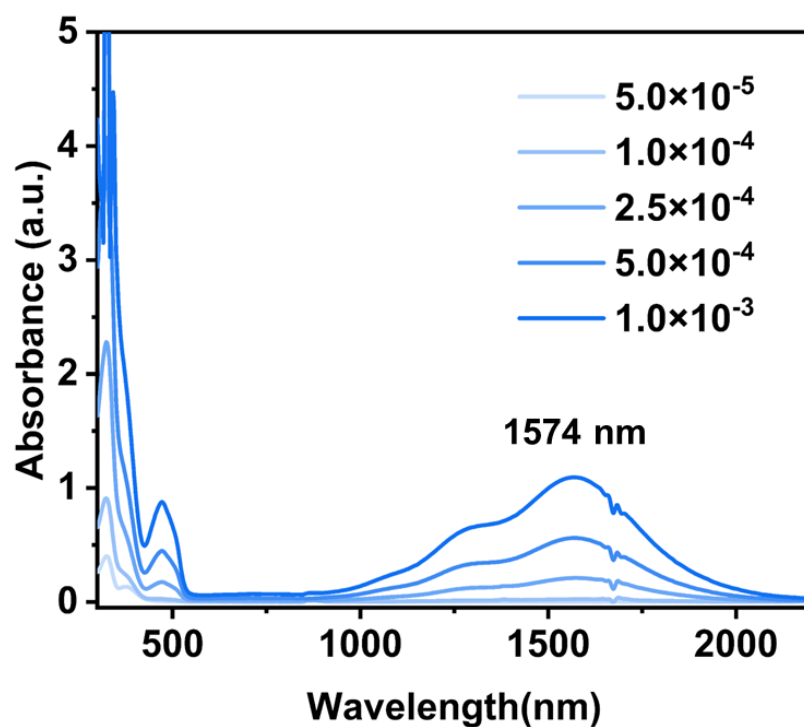

**Figure S50.** UV-vis-NIR absorption spectra of Ad[10]CPP-H with two equivalents of NOBF<sub>4</sub> recorded over a range of different concentrations CH<sub>2</sub>Cl<sub>2</sub> solutions.

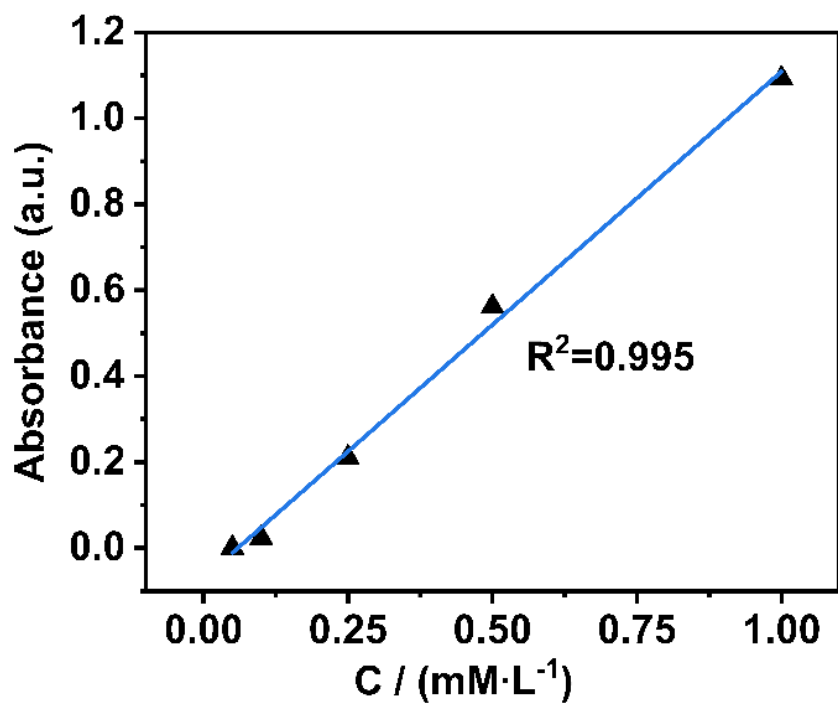

Figure S51. Dependence of the intensity of the band at 1574 nm on concentration.

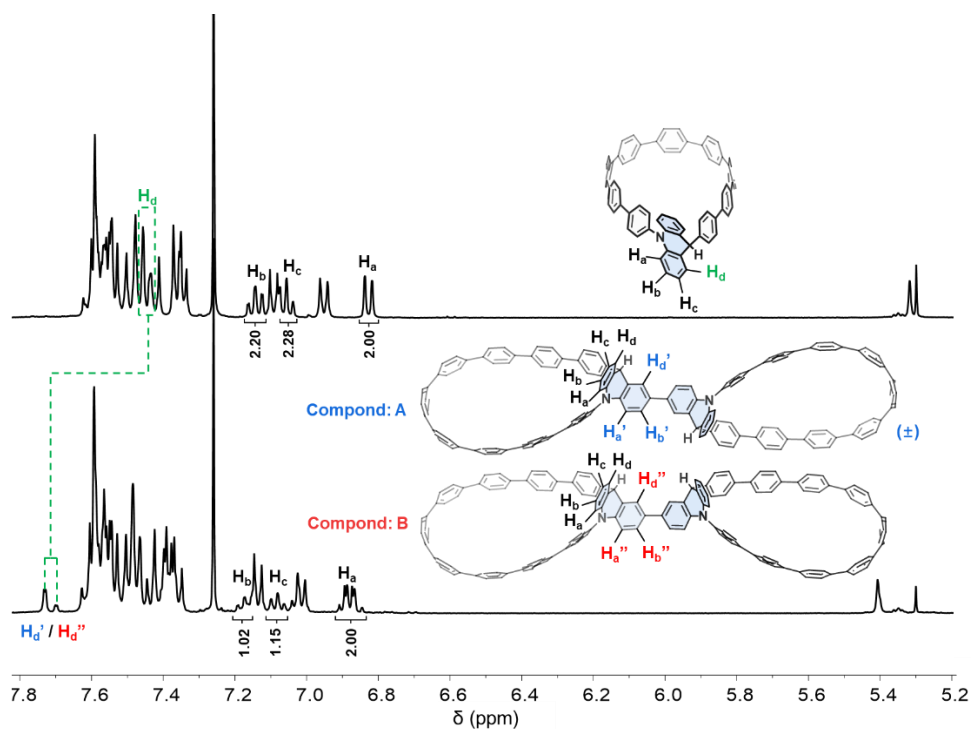

Figure S52.  $^1\text{H}$  NMR spectra of Ad[10]CPP-dimer in  $\text{CDCl}_3$  (298 K, 400 MHz).

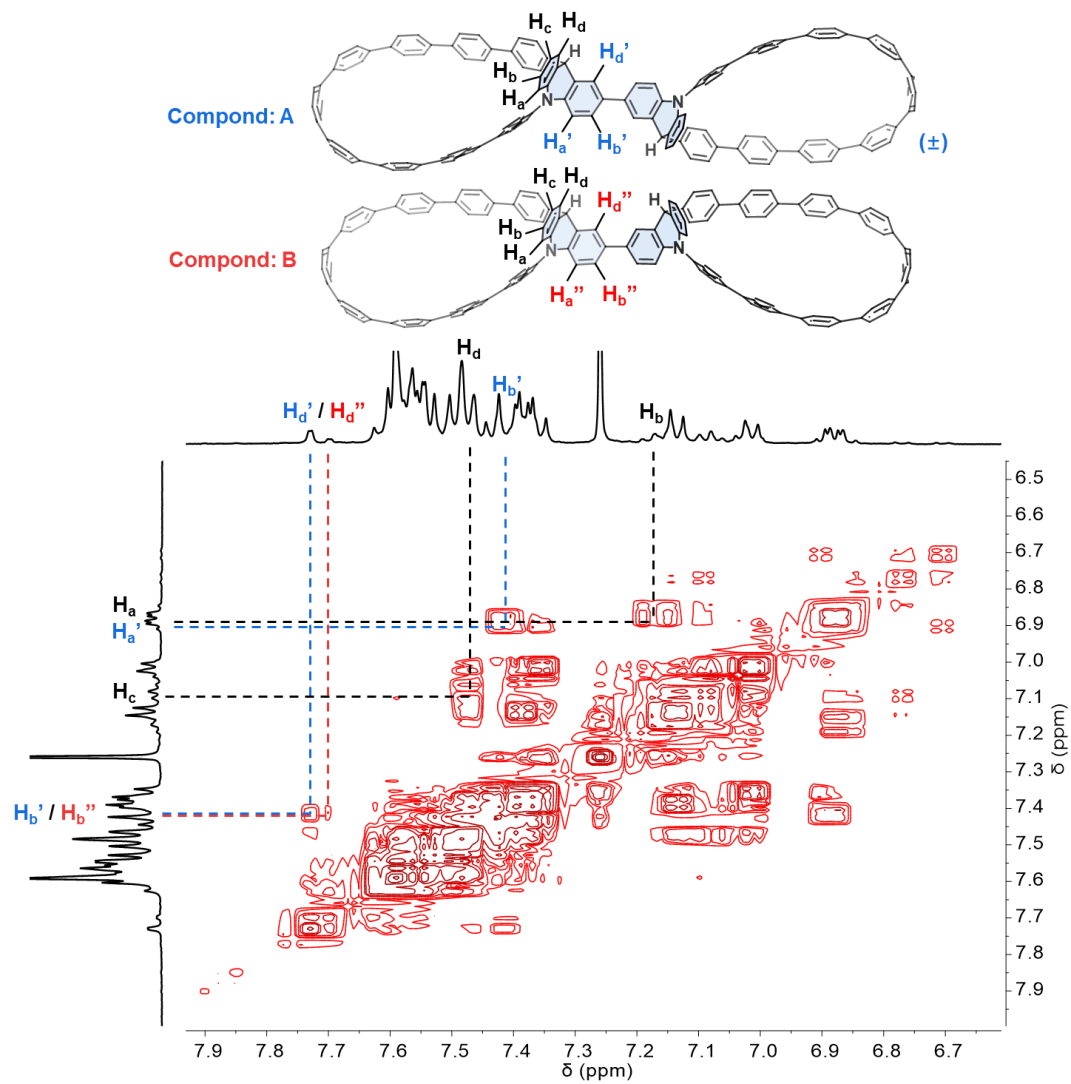

Figure S53.  $^1\text{H}$ - $^1\text{H}$  COSY spectra of Ad[10]CPP-dimer in  $\text{CDCl}_3$  (298 K, 400 MHz).

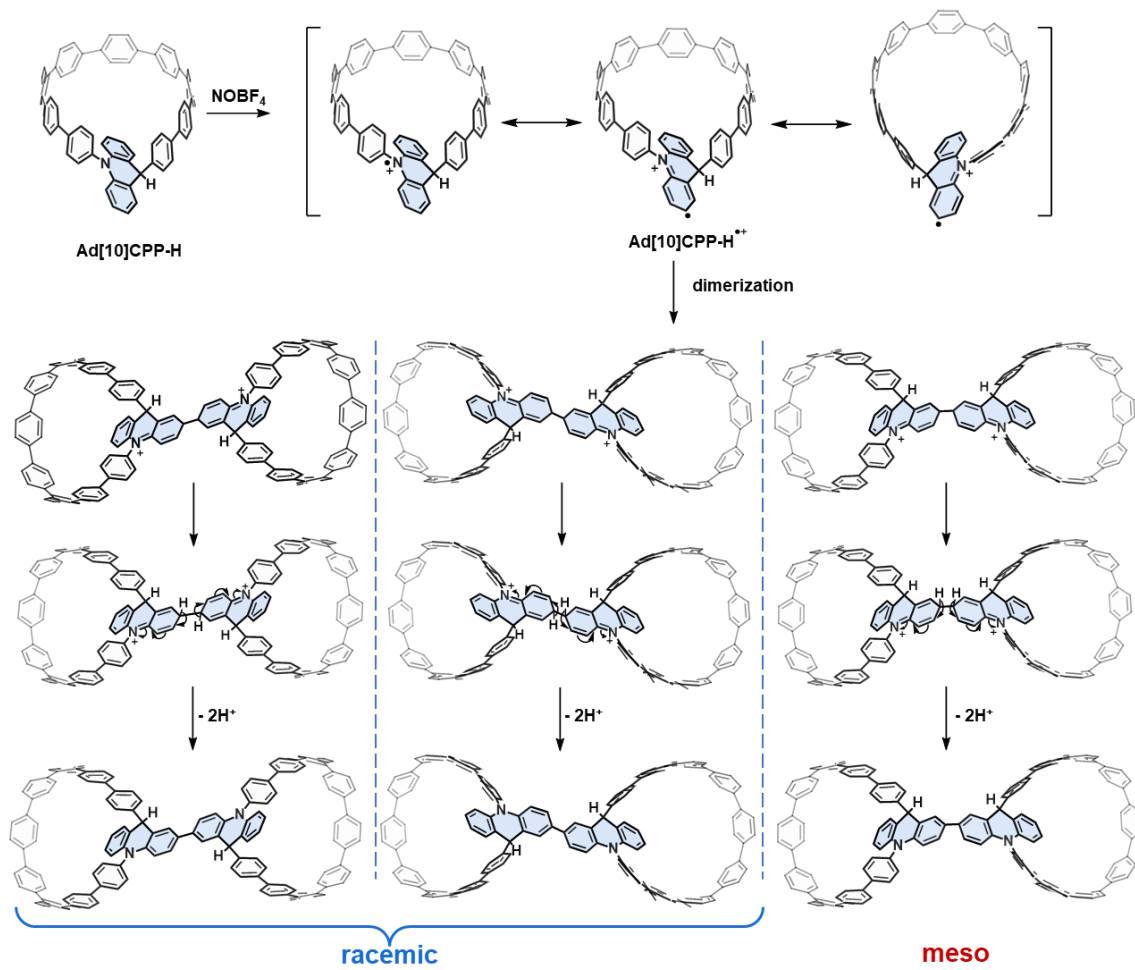

Figure S54. A plausible mechanism for the formation of Ad[10]CPP-dimer.

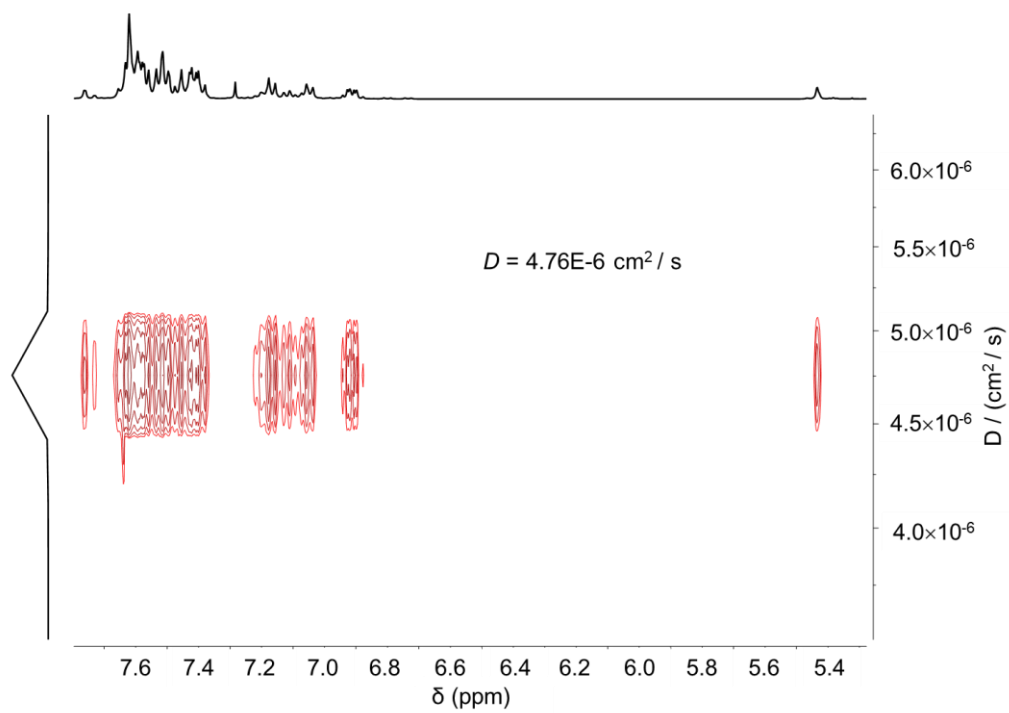

**Figure S55.** Partial DOSY spectrum of **Ad[10]CPP-dimer** in  $\text{CDCl}_3$  (298 K, 400 MHz).

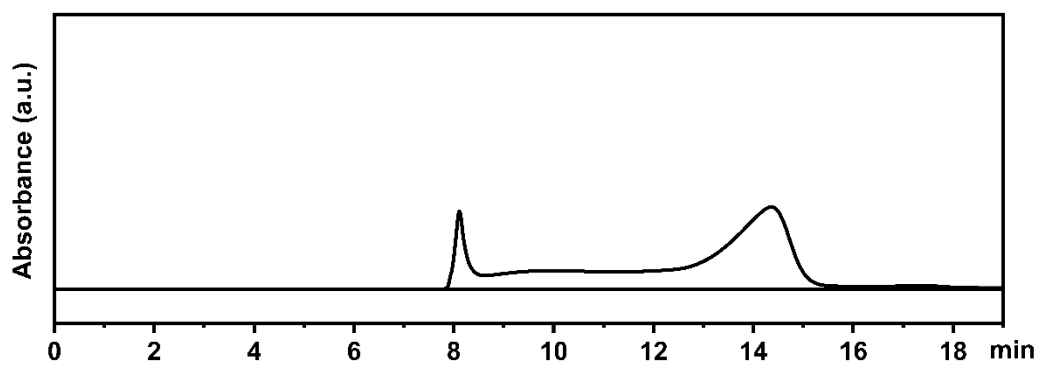

**Figure S56.** HPLC chromatogram of **Ad[10]CPP-dimer**, eluent: 1:1  $\text{CH}_2\text{Cl}_2$ /n-hexane, flow rate: 2 mL/min, detection wavelength: 326 nm.

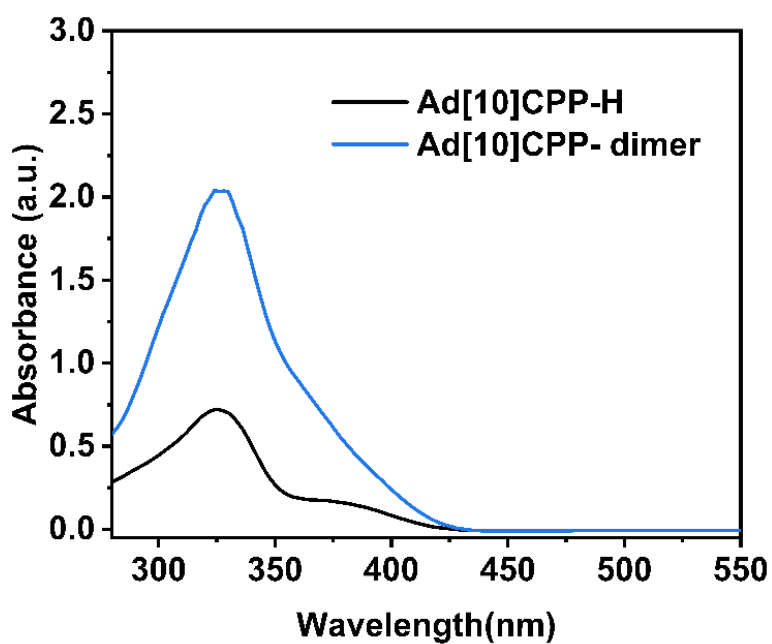

**Figure S57.** UV-vis absorption spectra of Ad[10]CPP-H in CH<sub>2</sub>Cl<sub>2</sub> solution ( $1 \times 10^{-4}$  M) (black line) and Ad[10]CPP-dimer in CH<sub>2</sub>Cl<sub>2</sub> solution ( $1 \times 10^{-4}$  M) (blue line).

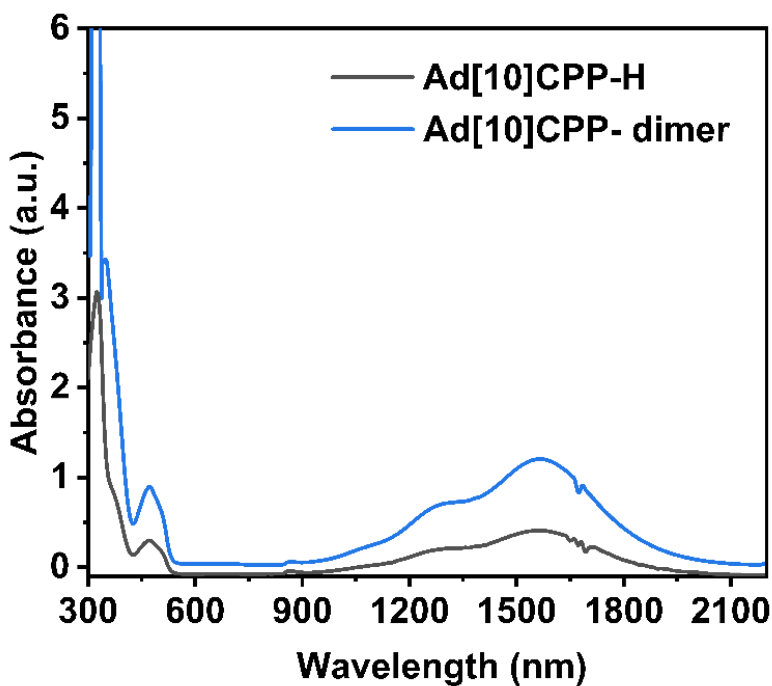

**Figure S58.** UV-vis-NIR absorption spectra of Ad[10]CPP-H with one equivalent of NOBF<sub>4</sub> in CH<sub>2</sub>Cl<sub>2</sub> solution ( $5 \times 10^{-4}$  M) (black line), and Ad[10]CPP-dimer with one equivalent of NOBF<sub>4</sub> in CH<sub>2</sub>Cl<sub>2</sub> solutions ( $5 \times 10^{-4}$  M) (blue line).

## 7. Complexation of Ad[10]CPP·TFA with C<sub>60</sub>

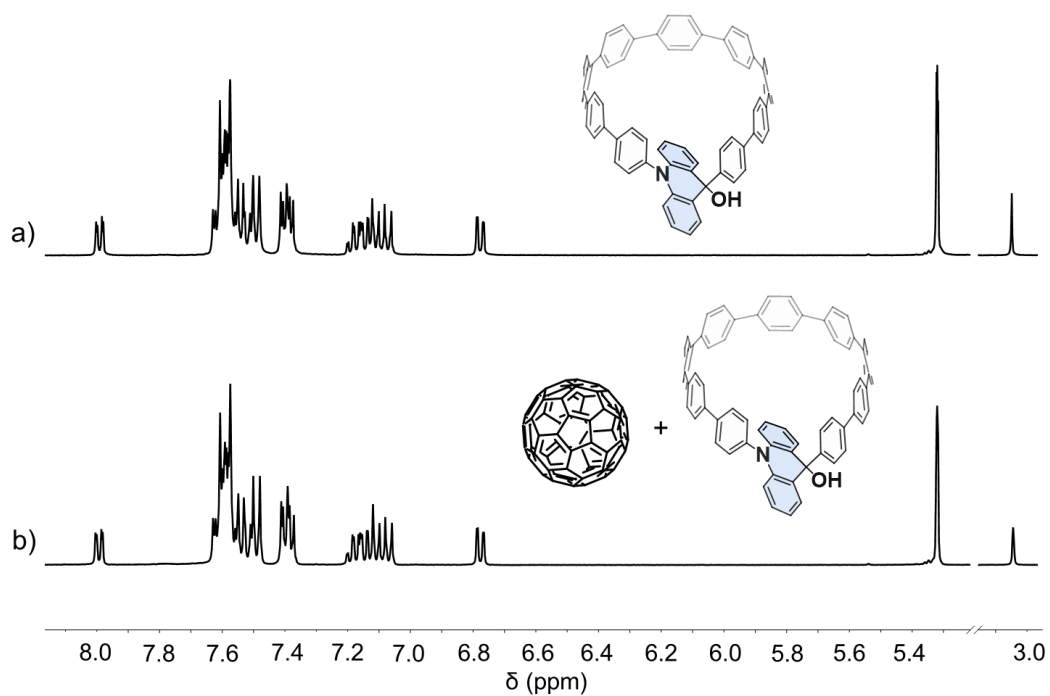

**Figure S59.** <sup>1</sup>H NMR spectra of Ad[10]CPP-OH in CD<sub>2</sub>Cl<sub>2</sub> a) before and b) after addition to C<sub>60</sub> (298 K, 400 MHz).

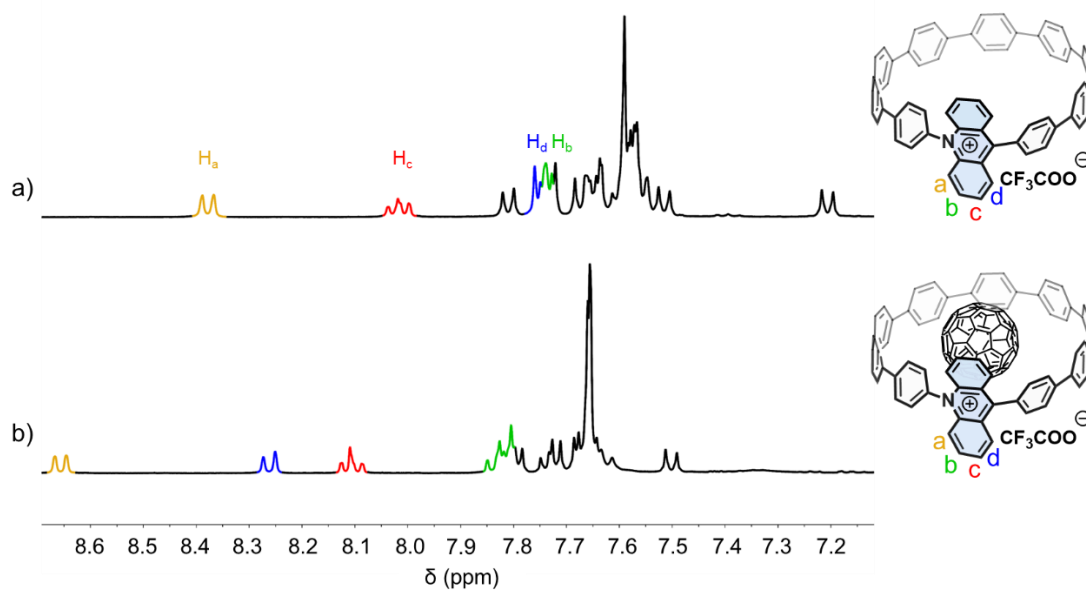

**Figure S60.** <sup>1</sup>H NMR spectra of Ad[10]CPP·TFA in CD<sub>2</sub>Cl<sub>2</sub> a) before and b) after addition to C<sub>60</sub> (298 K, 400 MHz).

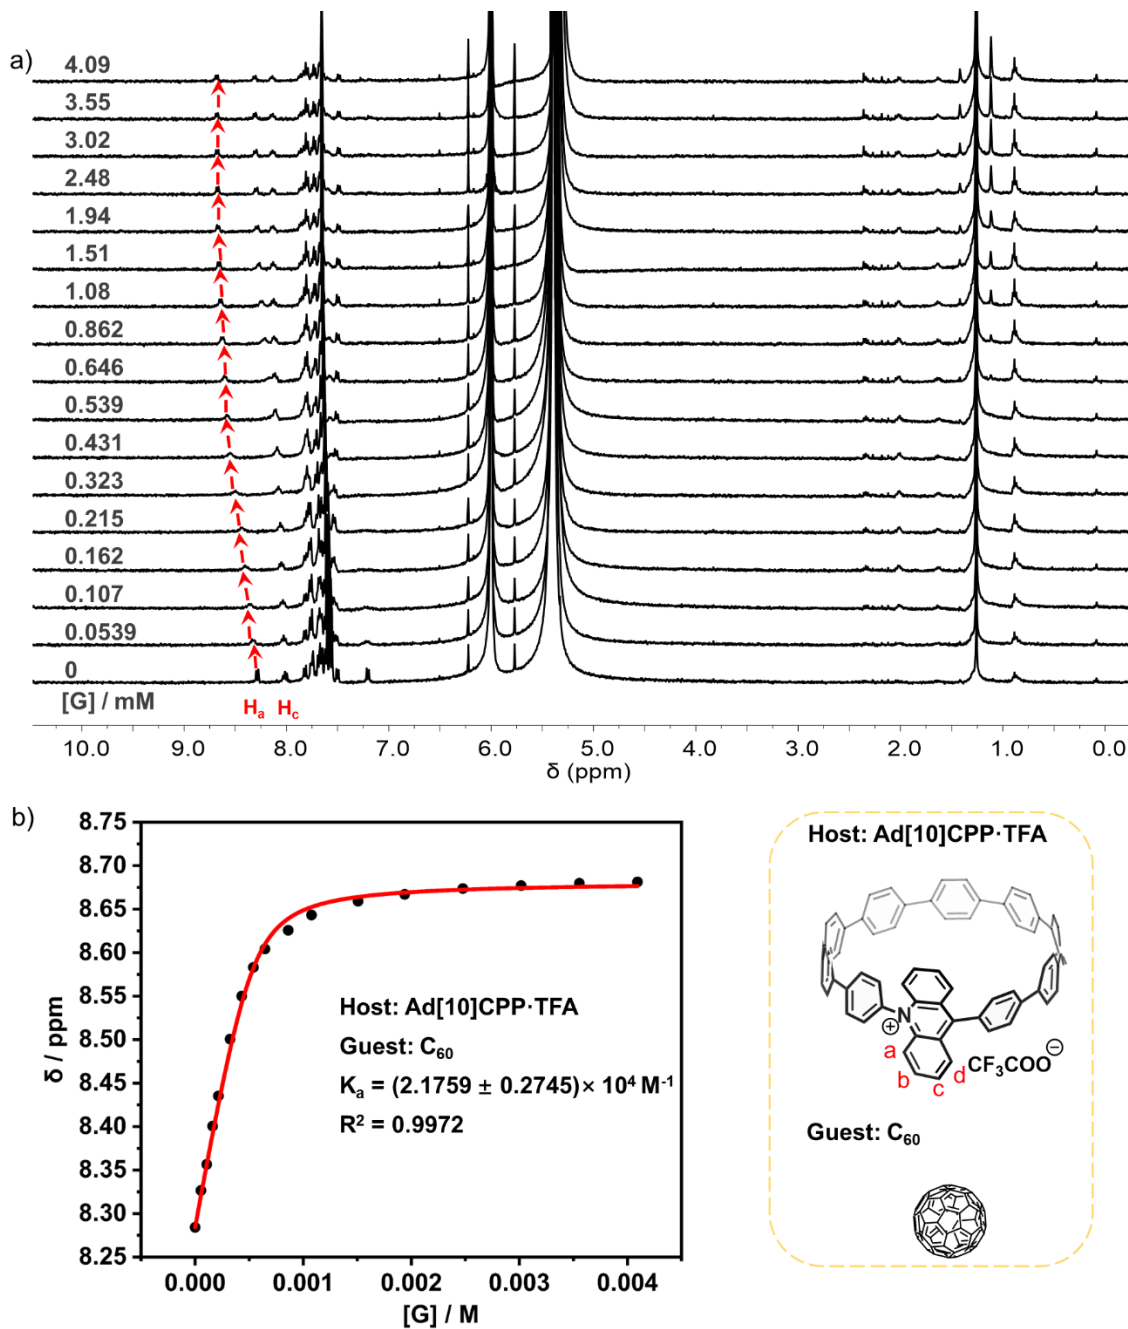

**Figure S61. <sup>1</sup>H NMR titration experiments.** a) <sup>1</sup>H NMR spectra (400 MHz, C<sub>2</sub>D<sub>2</sub>Cl<sub>4</sub>-d<sub>2</sub>, 298 K) of Ad[10]CPP-TFA (0.53 mM) titrated by C<sub>60</sub>, the concentration range of C<sub>60</sub> is 0 ~ 4.09 mM, the changes of signals of **proton a** with the addition of C<sub>60</sub> are marked with red arrow; b) Nonlinear fitting for the complexation between Ad[10]CPP-TFA and C<sub>60</sub> based **proton a**.

#### Speciation Analysis for the Binding Experiment

The binding between Ad[10]CPP<sup>+</sup> (host) and C<sub>60</sub> (guest) follows a 1:1 stoichiometry:

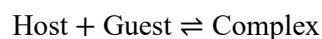

The binding constant  $K_a$  is defined as:

$$K_a = \frac{[\text{Complex}]}{[\text{Host}]_{\text{free}}[\text{Guest}]_{\text{free}}}$$

Given the total concentrations of host and guest:

$$[\text{Host}]_{\text{total}} = [\text{Host}]_{\text{free}} + [\text{Complex}]$$

$$[\text{Guest}]_{\text{total}} = [\text{Guest}]_{\text{free}} + [\text{Complex}]$$

For the titration experiment shown in Figure 5, the host concentration was fixed at **0.53 mM**, while the guest concentration ranged from **0 to 4.09 mM**. Using the measured binding constant  $K_a = (2.18 \pm 0.27) \times 10^4 \text{ M}^{-1}$ , the equilibrium concentrations at the titration endpoint (4.09 mM  $C_{60}$ ) were calculated to be  $[\text{Complex}] \approx 0.523 \text{ mM}$ ,  $[\text{Host}]_{\text{free}} \approx 0.007 \text{ mM}$ , and  $[\text{Guest}]_{\text{free}} \approx 3.567 \text{ mM}$ . This corresponds to a **1:1 complex molar fraction of 98.7%** relative to total host, indicating that under the experimental conditions, the host exists almost exclusively as the host–guest complex.

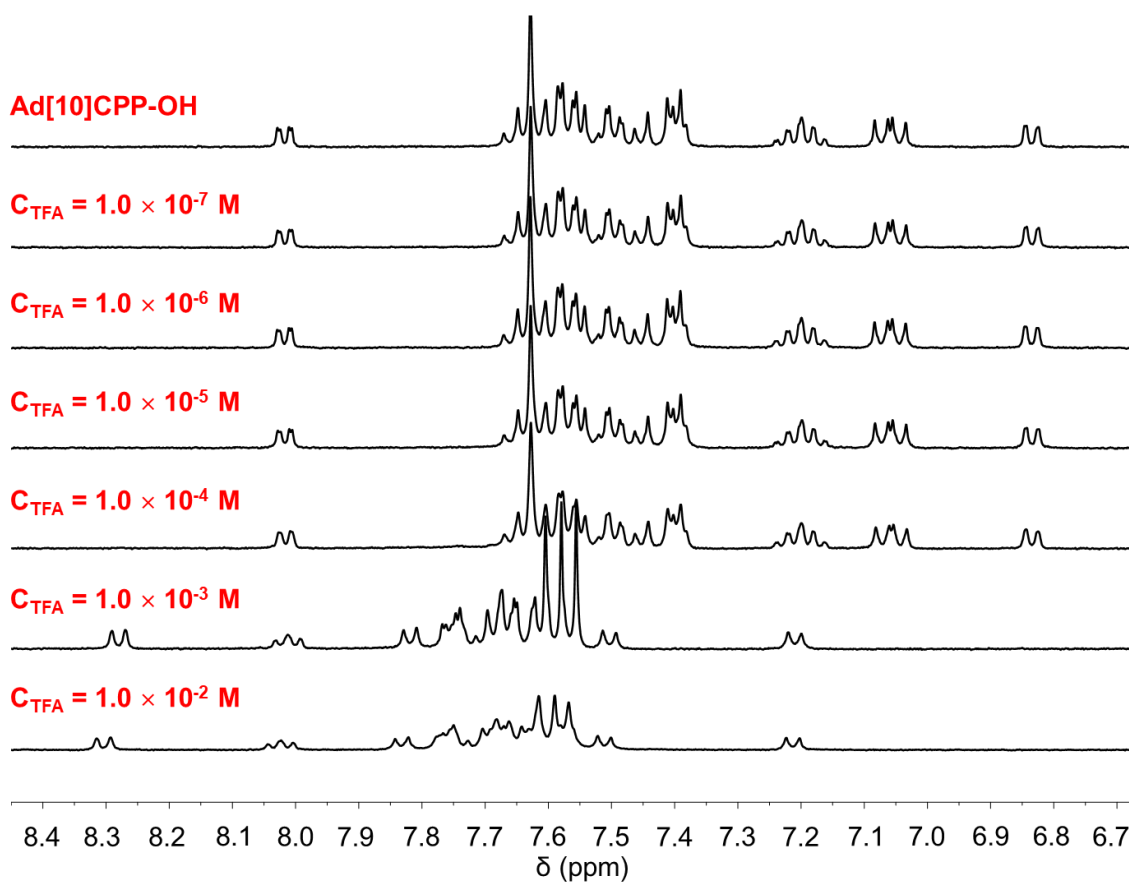

**Figure S62.  $^1\text{H}$  NMR titration experiments.**  $^1\text{H}$  NMR spectra (400 MHz,  $\text{C}_2\text{D}_2\text{Cl}_4\text{-}d_2$ , 298 K) of Ad[10]CPP-OH (1.0 mM) without  $C_{60}$  titrated by TFA, the concentration range of TFA is  $1.0 \times 10^{-7} \text{ M} \sim 1.0 \times 10^{-2} \text{ M}$ .

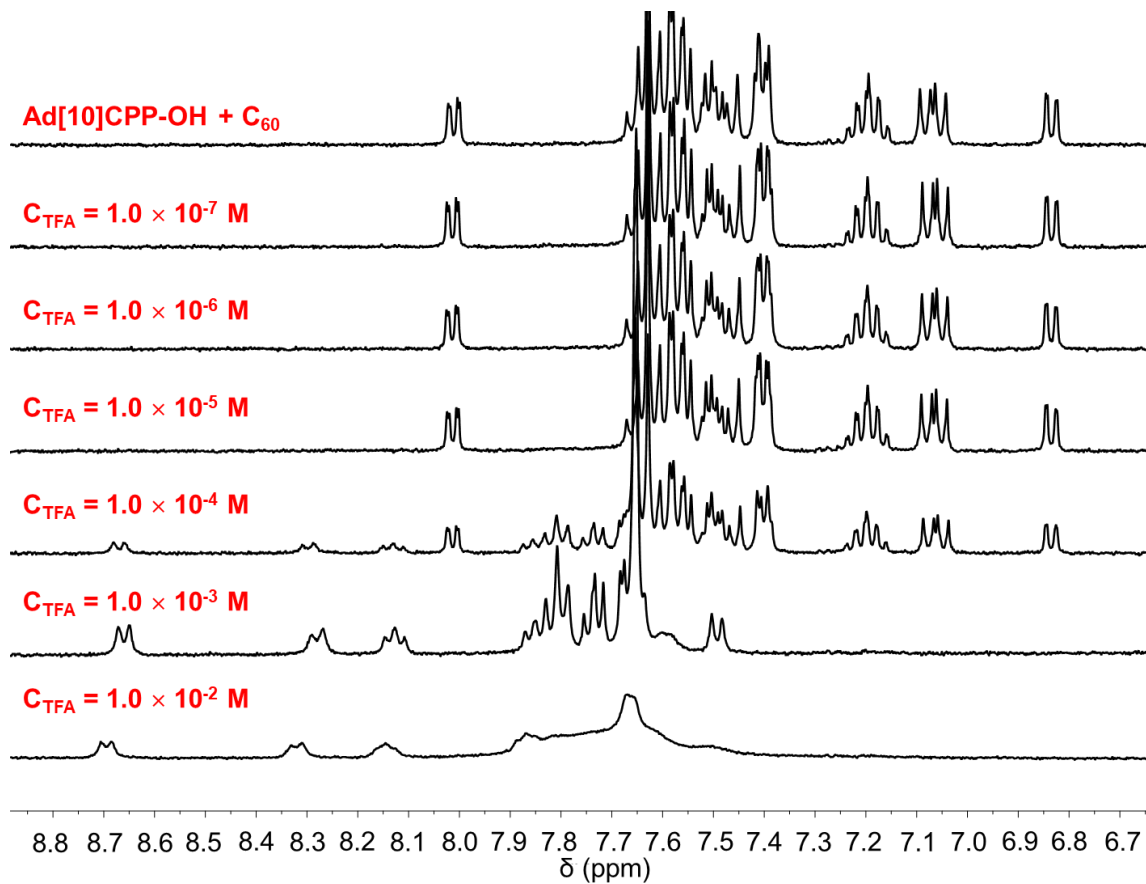

**Figure S63. <sup>1</sup>H NMR titration experiments.** <sup>1</sup>H NMR spectra (400 MHz, C<sub>2</sub>D<sub>2</sub>Cl<sub>4</sub>-d<sub>2</sub>, 298 K) of Ad[10]CPP-OH (1.0 mM) with C<sub>60</sub> (2.4 mM) titrated by TFA, the concentration range of TFA is 1.0 × 10<sup>-7</sup> M ~ 1.0 × 10<sup>-2</sup> M.

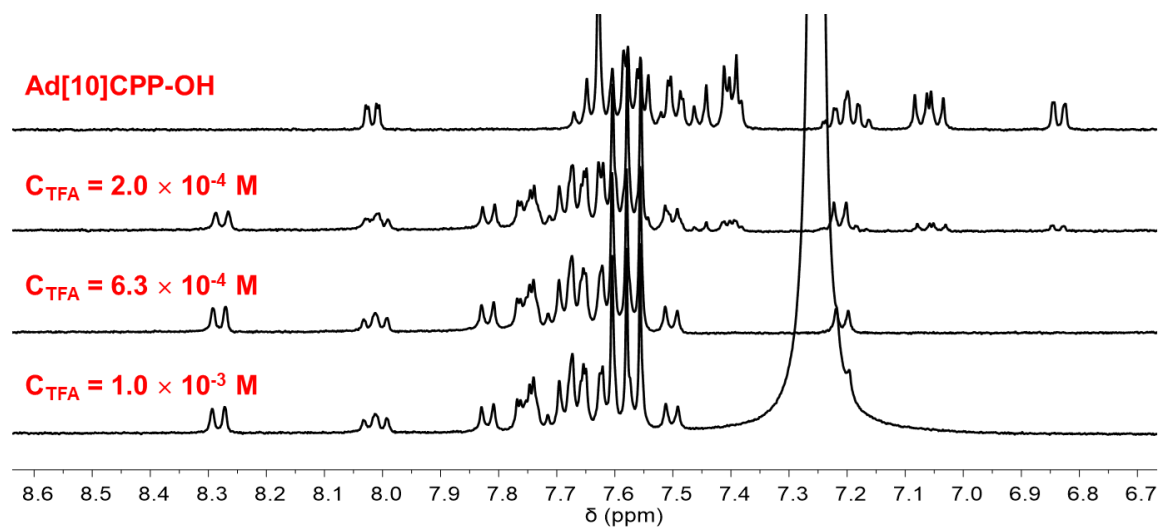

**Figure S64. <sup>1</sup>H NMR titration experiments.** <sup>1</sup>H NMR spectra (400 MHz, C<sub>2</sub>D<sub>2</sub>Cl<sub>4</sub>-d<sub>2</sub>, 298 K) of Ad[10]CPP-OH (1.0 mM) without C<sub>60</sub> titrated by TFA, the concentration range of TFA is pH = 2.0 × 10<sup>-4</sup> M ~ 1.0 × 10<sup>-3</sup> M.

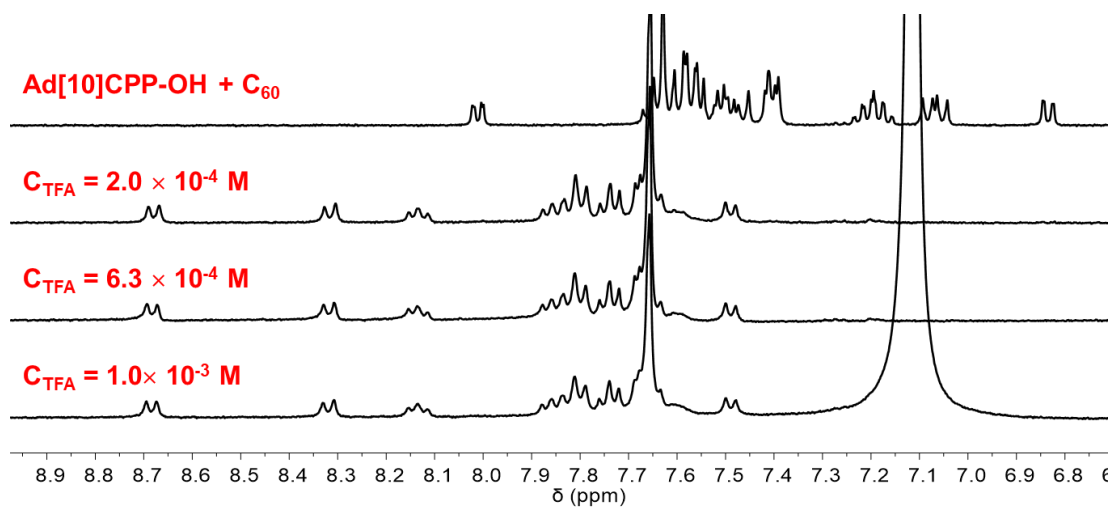

**Figure S65. <sup>1</sup>H NMR titration experiments.** <sup>1</sup>H NMR spectra (400 MHz, C<sub>2</sub>D<sub>2</sub>Cl<sub>4</sub>-d<sub>2</sub>, 298 K) of Ad[10]CPP-OH (1.0 mM) with C<sub>60</sub> (5.0 mM) titrated by TFA, the concentration range of TFA is 2.0 × 10<sup>-4</sup> M ~ 1.0 × 10<sup>-3</sup> M.

## 8. pH-stimulate responsive properties of Ad[10]CPP-TFA

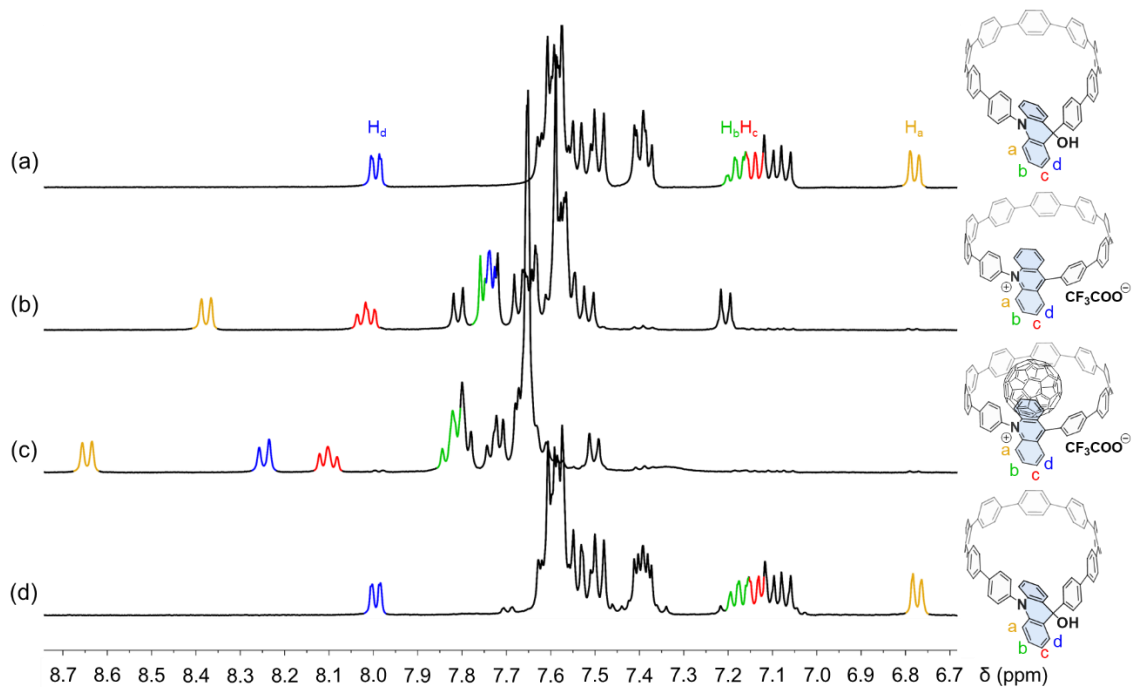

**Figure S66.**  $^1\text{H}$  NMR spectra (400MHz,  $\text{CD}_2\text{Cl}_2$ , 298 K) of a) Ad[10]CPP-OH and Ad[10]CPP-OH with the addition of b) 5 eq TFA, c) 1.5eq  $\text{C}_{60}$ , d) 5eq TEA sequentially.

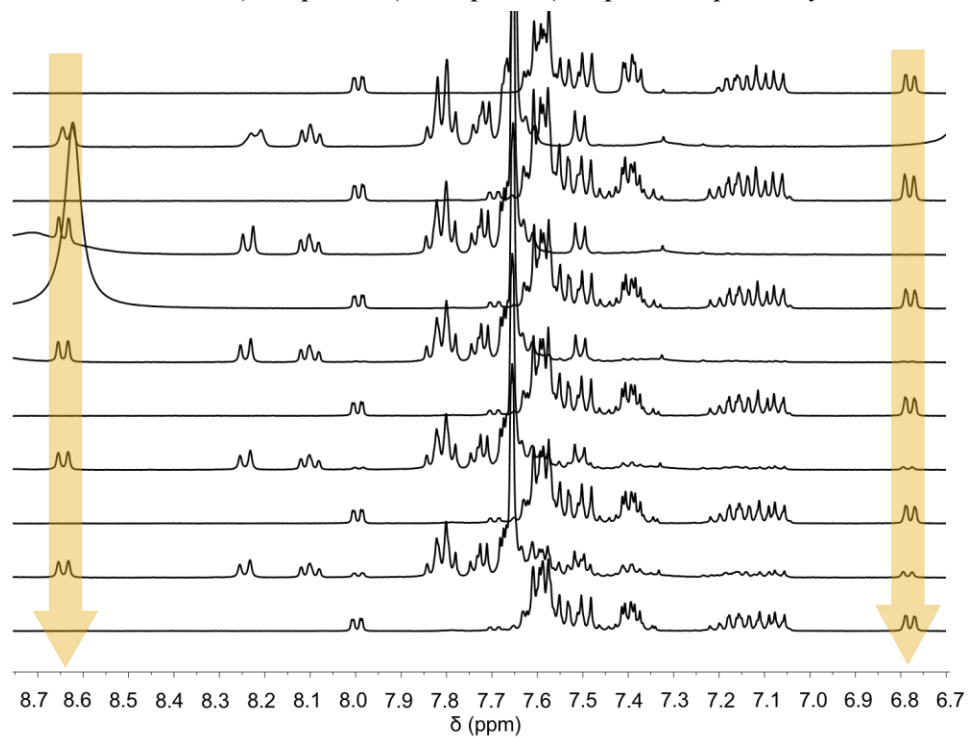

**Figure S67.**  $^1\text{H}$  NMR spectra of catch and release  $\text{C}_{60}$  switching cycles of Ad[10]CPP-TFA under Acid (TFA) / neutral (TEA) conditions at least five times.

## 9. X-ray crystallographic data

The single crystal of **Ad[10]CPP-H** suitable for X-ray crystallographic analysis was obtained by diffusion of pentane into the solution of **Ad[10]CPP-H** in THF at room temperature. The single crystal X-ray diffraction study of **Ad[10]CPP-H** was performed on the Bruker D8 Venture diffractometer using  $\text{GaK}\alpha$  ( $\lambda = 1.34139 \text{ \AA}$ ). The crystal was kept at 213.00 K during data collection. Using Olex2<sup>[6]</sup>, the structure was solved with the SHELXT<sup>[7]</sup> structure solution program using Intrinsic Phasing and refined with the SHELXL<sup>[8]</sup> refinement package using Least Squares minimization. Crystallographic data for **Ad[10]CPP-H** reported in this paper have been deposited with the Cambridge Crystallographic Data Centre (CCDC: 2449559).

The single crystal of **Ad[10]CPP-OH** suitable for X-ray crystallographic analysis was obtained by diffusion of pentane into the solution of **Ad[10]CPP-OH** in THF at room temperature. The single crystal X-ray diffraction study of **Ad[10]CPP-H** and **Ad[10]CPP-OH** was performed on the Bruker D8 Venture diffractometer using  $\text{GaK}\alpha$  ( $\lambda = 1.34139 \text{ \AA}$ ). The crystal was kept at 173.00 K during data collection. Using Olex2<sup>[5]</sup>, the structure was solved with the SHELXT<sup>[7]</sup> structure solution program using Intrinsic Phasing and refined with the SHELXL<sup>[8]</sup> refinement package using Least Squares minimization. Crystallographic data for **Ad[10]CPP-OH** reported in this paper have been deposited with the Cambridge Crystallographic Data Centre (CCDC: 2449558).

The single crystal of **C<sub>60</sub>⊂Ad[10]CPP·TFA** suitable for X-ray crystallographic analysis was obtained by diffusion of the solution of **Ad[10]CPP·TFA** in toluene and TFA at room temperature. The single crystal X-ray diffraction study **C<sub>60</sub>⊂Ad[10]CPP·TFA** was performed on the Bruker D8 Venture diffractometer using  $\text{GaK}\alpha$  ( $\lambda = 1.34139 \text{ \AA}$ ). The crystal was kept at 100.00 K during data collection. Using Olex2<sup>[6]</sup>, the structure was solved with the SHELXT<sup>[7]</sup> structure solution program using Intrinsic Phasing and refined with the SHELXL<sup>[8]</sup> refinement package using Least Squares minimization. Crystallographic data for **C<sub>60</sub>⊂Ad[10]CPP·TFA** reported in this paper have been deposited with the Cambridge Crystallographic Data Centre (CCDC: 2449561).

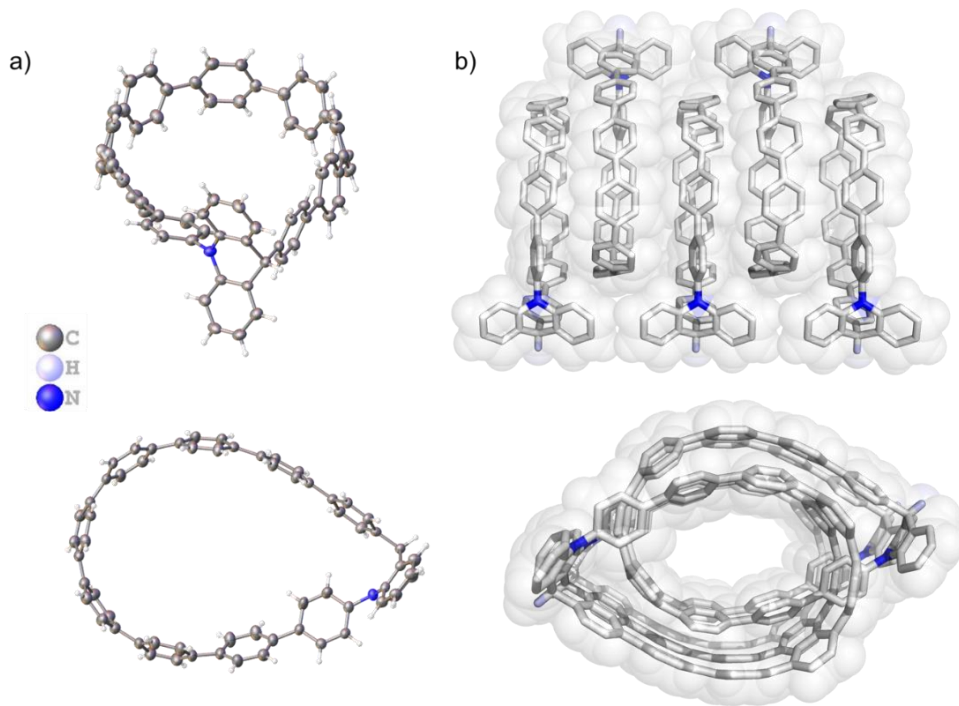

**Figure S68.** a) ORTEP drawings and b) Packing diagram (space-filling model) of X-ray solid-state structure of Ad[10]CPP-H in side view and top view. Thermal ellipsoids are set at 30 % probability. Grey C, White H, Blue N. Solvent molecules are omitted for clarity.

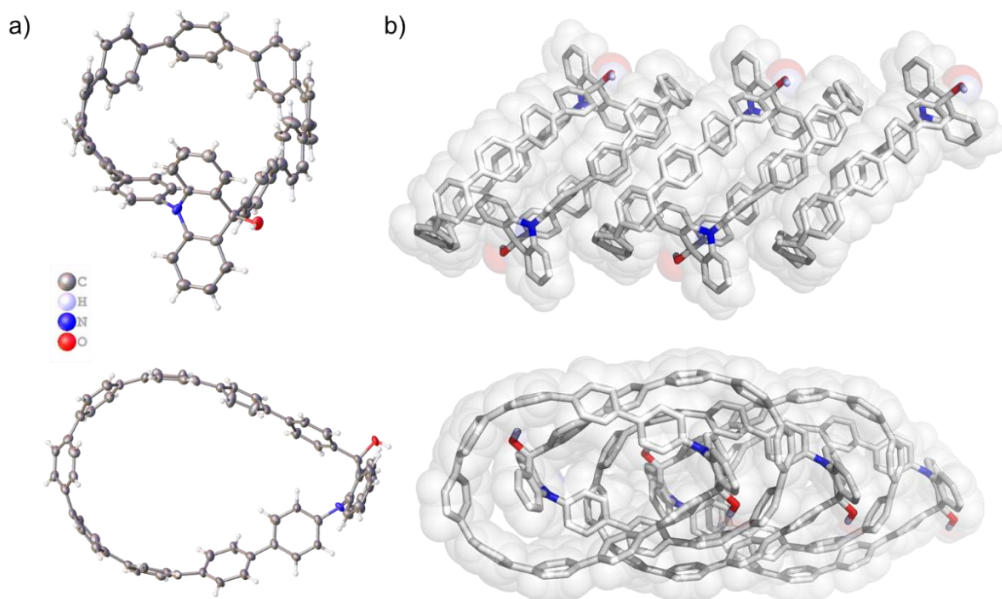

**Figure S69.** a) ORTEP drawings and b) Packing diagram (space-filling model) of X-ray solid-state structure of Ad[10]CPP-OH in side view and top view. Thermal ellipsoids are set at 30 % probability. Grey C, White H, Blue N, Red O. Solvent molecules are omitted for clarity.

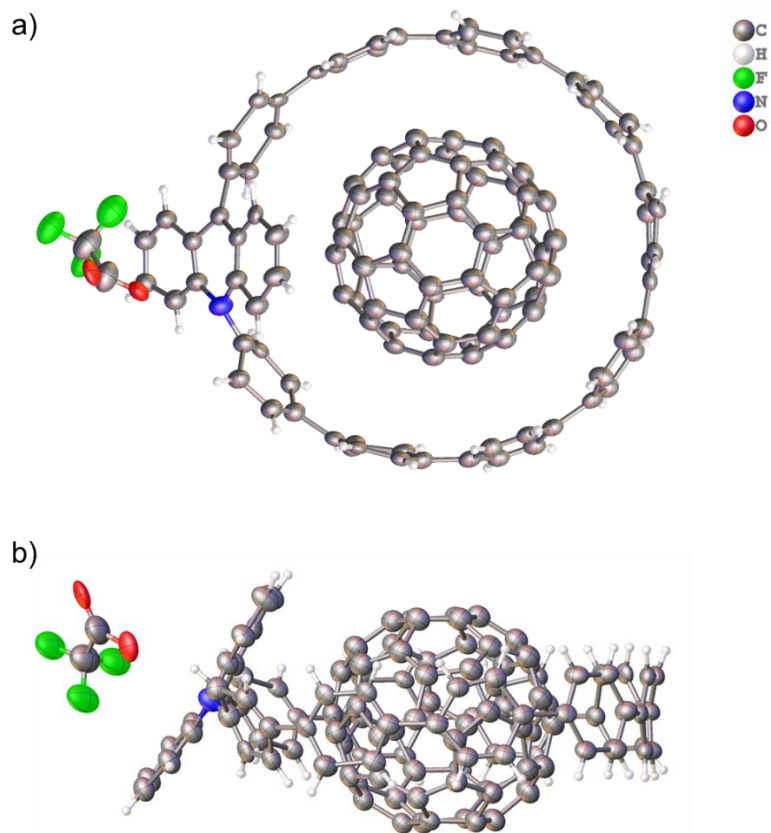

**Figure S70.** ORTEP drawings of X-ray solid-state structure of  $C_{60}C$  Ad[10]CPP·TFA in a) top view and b) side view. Thermal ellipsoids are set at 30 % probability. grey C, White H, Green F, Blue N, Red O. Solvent molecules are omitted for clarity.

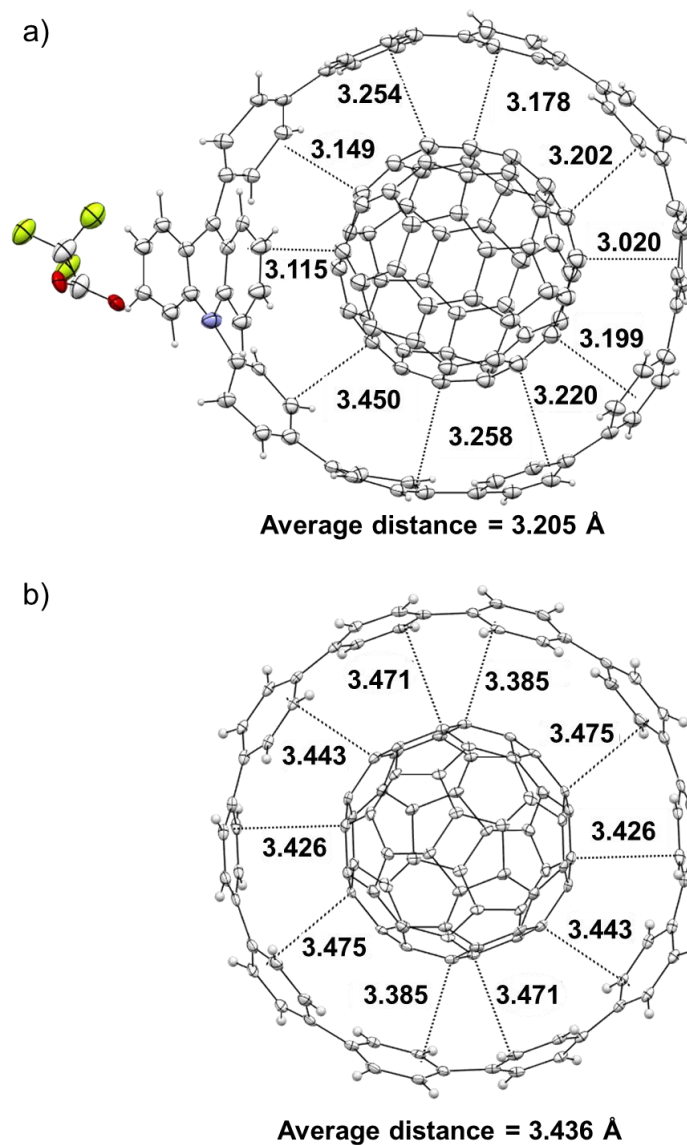

**Figure S71.** The distance of C<sub>60</sub> and phenylene moieties in the X-ray solid-state structure of C<sub>60</sub>⊂Ad[10]CPP·TFA and b) C<sub>60</sub>⊂[10]CPP. Thermal ellipsoids are set at 15 % probability, respectively. Grey C, White H, Blue N. Solvent molecules are omitted for clarity.

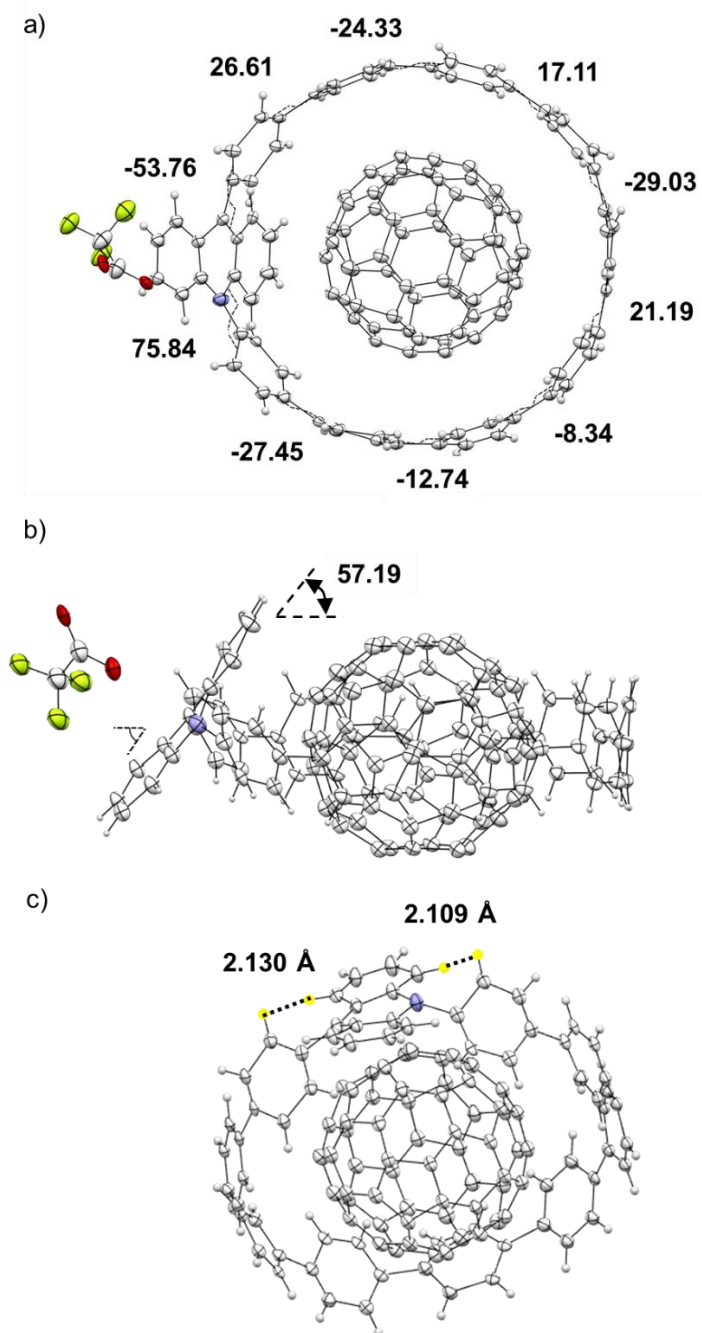

**Figure S72.** a) The torsion angles of between adjacent phenylene moieties of **Ad[10]CPP<sup>+</sup>** in the X-ray solid-state structure of **C<sub>60</sub>⊂Ad[10]CPP·TFA**, b) The dihedral angle between the acridinium and the ring plane of cycloparaphenylenes of **Ad[10]CPP<sup>+</sup>** in X-ray solid-state structure of **C<sub>60</sub>⊂Ad[10]CPP·TFA**, c) Schematic diagram of steric hindrance between the close contacted hydrogen atoms on acridinium and adjacent phenylene moieties of **Ad[10]CPP<sup>+</sup>**. Thermal ellipsoids are set at 15 % probability, respectively. Grey C, White H, Blue N. Solvent molecules are omitted for clarity.

**Table S2. Crystal data and structure refinement for Ad[10]CPP-H at 213 K**

|                                                   |                                                                |
|---------------------------------------------------|----------------------------------------------------------------|
| <b>Identification code</b>                        | <b>Ad[10]CPP-H</b>                                             |
| <b>Empirical formula</b>                          | C <sub>73.5</sub> H <sub>58</sub> ClNO                         |
| <b>Formula weight</b>                             | 1006.66                                                        |
| <b>Temperature/K</b>                              | 213.00                                                         |
| <b>Crystal system</b>                             | triclinic                                                      |
| <b>Space group</b>                                | P-1                                                            |
| <b>a/Å</b>                                        | 10.                                                            |
| <b>b/Å</b>                                        | 17.7237(15)                                                    |
| <b>c/Å</b>                                        | 19.0853(17)                                                    |
| <b>α/°</b>                                        | 113.419(6)                                                     |
| <b>β/°</b>                                        | 92.807(7)                                                      |
| <b>γ/°</b>                                        | 104.671(6)                                                     |
| <b>Volume/Å<sup>3</sup></b>                       | 3135.1(5)                                                      |
| <b>Z</b>                                          | 2                                                              |
| <b>ρ<sub>calc</sub>/cm<sup>3</sup></b>            | 1.066                                                          |
| <b>μ/mm<sup>-1</sup></b>                          | 0.555                                                          |
| <b>F (000)</b>                                    | 1062.0                                                         |
| <b>Crystal size/mm<sup>3</sup></b>                | 0.07 × 0.07 × 0.05                                             |
| <b>Radiation</b>                                  | GaKα (λ = 1.34139)                                             |
| <b>2θ range for data collection/°</b>             | 7.614 to 110.286                                               |
| <b>Index ranges</b>                               | -12 ≤ h ≤ 12, -21 ≤ k ≤ 21, -23 ≤ l ≤ 23                       |
| <b>Reflections collected</b>                      | 37383                                                          |
| <b>Independent reflections</b>                    | 11912 [R <sub>int</sub> = 0.1230, R <sub>sigma</sub> = 0.1470] |
| <b>Data/restraints/parameters</b>                 | 11912/166/714                                                  |
| <b>Goodness-of-fit on F<sup>2</sup></b>           | 0.834                                                          |
| <b>Final R indexes [I &gt;= 2σ (I)]</b>           | R <sub>1</sub> = 0.1192, wR <sub>2</sub> = 0.2676              |
| <b>Final R indexes [all data]</b>                 | R <sub>1</sub> = 0.2134, wR <sub>2</sub> = 0.3215              |
| <b>Largest diff. peak/hole / e Å<sup>-3</sup></b> | 0.77/-0.42                                                     |

**Table S3. Crystal data and structure refinement for Ad[10]CPP-OH at 173 K**

|                            |                                                 |
|----------------------------|-------------------------------------------------|
| <b>Identification code</b> | <b>Ad[10]CPP-OH</b>                             |
| <b>Empirical formula</b>   | C <sub>71</sub> H <sub>53</sub> NO <sub>2</sub> |
| <b>Formula weight</b>      | 952.14                                          |
| <b>Temperature/K</b>       | 173.00                                          |
| <b>Crystal system</b>      | triclinic                                       |
| <b>Space group</b>         | P-1                                             |

|                                                         |                                                                |
|---------------------------------------------------------|----------------------------------------------------------------|
| <b>a/Å</b>                                              | 12.6507(8)                                                     |
| <b>b/Å</b>                                              | 17.9247(11)                                                    |
| <b>c/Å</b>                                              | 25.9006(19)                                                    |
| <b><math>\alpha</math>/°</b>                            | 79.650(4)                                                      |
| <b><math>\beta</math>/°</b>                             | 79.495(4)                                                      |
| <b><math>\gamma</math>/°</b>                            | 73.761(4)                                                      |
| <b>Volume/Å<sup>3</sup></b>                             | 5492.6(6)                                                      |
| <b>Z</b>                                                | 4                                                              |
| <b><math>\rho_{\text{calc}}/\text{cm}^3</math></b>      | 1.151                                                          |
| <b><math>\mu/\text{mm}^{-1}</math></b>                  | 0.334                                                          |
| <b>F (000)</b>                                          | 2008.0                                                         |
| <b>Crystal size/mm<sup>3</sup></b>                      | 0.17 × 0.17 × 0.05                                             |
| <b>Radiation</b>                                        | GaK $\alpha$ ( $\lambda = 1.34139$ )                           |
| <b>2<math>\Theta</math> range for data collection/°</b> | 5.086 to 110.696                                               |
| <b>Index ranges</b>                                     | -14 ≤ h ≤ 15, -21 ≤ k ≤ 21, -31 ≤ l ≤ 29                       |
| <b>Reflections collected</b>                            | 45042                                                          |
| <b>Independent reflections</b>                          | 20364 [R <sub>int</sub> = 0.1584, R <sub>sigma</sub> = 0.2025] |
| <b>Data/restraints/parameters</b>                       | 20364/19/1335                                                  |
| <b>Goodness-of-fit on F<sup>2</sup></b>                 | 0.831                                                          |
| <b>Final R indexes [I ≥ 2<math>\sigma</math> (I)]</b>   | R <sub>1</sub> = 0.1515, wR <sub>2</sub> = 0.2959              |
| <b>Final R indexes [all data]</b>                       | R <sub>1</sub> = 0.2425, wR <sub>2</sub> = 0.3501              |
| <b>Largest diff. peak/hole / e Å<sup>-3</sup></b>       | 0.44/-0.45                                                     |

**Table S4. Crystal data and structure refinement for C<sub>60</sub>⊂Ad[10]CPP·TFA at 100 K**

|                              |                                                                                  |
|------------------------------|----------------------------------------------------------------------------------|
| <b>Identification code</b>   | <b>C<sub>60</sub>⊂Ad[10]CPP·TFA</b>                                              |
| <b>Empirical formula</b>     | C <sub>322</sub> H <sub>156</sub> F <sub>18</sub> N <sub>2</sub> O <sub>12</sub> |
| <b>Formula weight</b>        | 4586.48                                                                          |
| <b>Temperature/K</b>         | 100.00                                                                           |
| <b>Crystal system</b>        | triclinic                                                                        |
| <b>Space group</b>           | P1                                                                               |
| <b>a/Å</b>                   | 9.8726(18)                                                                       |
| <b>b/Å</b>                   | 17.269(3)                                                                        |
| <b>c/Å</b>                   | 31.681(5)                                                                        |
| <b><math>\alpha</math>/°</b> | 78.618(8)                                                                        |
| <b><math>\beta</math>/°</b>  | 89.112(8)                                                                        |
| <b><math>\gamma</math>/°</b> | 78.742(8)                                                                        |
| <b>Volume/Å<sup>3</sup></b>  | 5191.7(16)                                                                       |
| <b>Z</b>                     | 1                                                                                |

---

|                                                                           |                                                                |
|---------------------------------------------------------------------------|----------------------------------------------------------------|
| <b><math>\rho_{\text{calc}}/\text{cm}^3</math></b>                        | 1.466                                                          |
| <b><math>\mu/\text{mm}^{-1}</math></b>                                    | 0.515                                                          |
| <b>F(000)</b>                                                             | 2360.0                                                         |
| <b>Crystal size/<math>\text{mm}^3</math></b>                              | $0.3 \times 0.03 \times 0.03$                                  |
| <b>Radiation</b>                                                          | GaK $\alpha$ ( $\lambda = 1.34139$ )                           |
| <b><math>2\Theta</math> range for data collection/<math>^\circ</math></b> | 2.476 to 75.13                                                 |
| <b>Index ranges</b>                                                       | $-8 \leq h \leq 8, -15 \leq k \leq 15, -28 \leq l \leq 28$     |
| <b>Reflections collected</b>                                              | 41467                                                          |
| <b>Independent reflections</b>                                            | 14490 [ $R_{\text{int}} = 0.0961, R_{\text{sigma}} = 0.1505$ ] |
| <b>Data/restraints/parameters</b>                                         | 14490/11258/3215                                               |
| <b>Goodness-of-fit on <math>F^2</math></b>                                | 1.530                                                          |
| <b>Final R indexes [<math>I \geq 2\sigma(I)</math>]</b>                   | $R_1 = 0.1476, wR_2 = 0.3683$                                  |
| <b>Final R indexes [all data]</b>                                         | $R_1 = 0.2184, wR_2 = 0.4298$                                  |
| <b>Largest diff. peak/hole / <math>e \text{ \AA}^{-3}</math></b>          | 0.44/-0.42                                                     |
| <b>Flack parameter</b>                                                    | 0.5(9)                                                         |

---

## 10. Theoretical Calculations

Ring strain energies are estimated by hypothetical reactions as shown below<sup>[9]</sup> (**Figure S72**). In this way, considering many possible conformations of each long ring opening counterpart as reference can be avoided. The heat of formation ( $\Delta H$ ) of the optimized structures of the reference compounds were calculated to obtain the ring strain energies of **Ad[10]CPP-H**, **Ad[10]CPP-OH** and **Ad[10]CPP<sup>+</sup>** (**Table S5**).

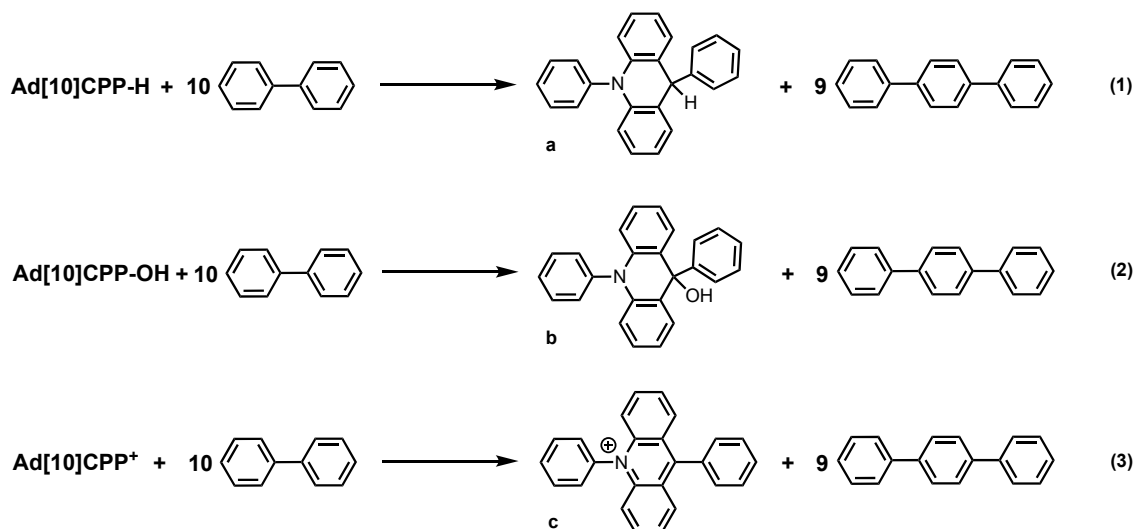

**Figure S73.** Hypothetical reactions for the calculation of strain energies of **Ad[10]CPP-H**, **Ad[10]CPP-OH** and **Ad[10]CPP<sup>+</sup>**.

**Table S5.** Electronic energies ( $E_e$ ), relative energies ( $\Delta E$ ), and strain energies ( $\Delta H$ ) of **Ad[10]CPP-H**, **Ad[10]CPP-OH** and **Ad[10]CPP<sup>+</sup>** obtained at the B3LYP-D3(BJ)/def2-TZVP-IEFPCM(Dichloromethane)// B3LYP-D3(BJ)/def2-SVP level of theory.

|                              | $E_e$<br>(a.u.) | $\Delta E$<br>(kcal/mol) | $\Delta H$<br>(kcal/mol) |
|------------------------------|-----------------|--------------------------|--------------------------|
| Biphenyl                     | -463.522649     |                          |                          |
| p-terphenyl                  | -694.687904     |                          |                          |
| a                            | -1019.350484    |                          |                          |
| b                            | -1094.605215    |                          |                          |
| c                            | -1018.585656    |                          |                          |
| <b>Ad[10]CPP-H</b>           | -2636.250092    | 40.8                     | 38.8                     |
| <b>Ad[10]CPP-OH</b>          | -2711.504635    | 40.9                     | 38.7                     |
| <b>Ad[10]CPP<sup>+</sup></b> | -2635.456602    | 58.8                     | 56.2                     |

Gaussian 16 package<sup>[10]</sup> was applied to perform all the DFT calculations. Optimizations of the geometries were carried out with B3LYP-D3 functional with Becke-Johnson (BJ) damping function<sup>[11, 12]</sup> and def2-SVP basis set<sup>[13, 14]</sup>. For the radical species, the optimization was conducted with unrestricted UB3LYP functional. IEFPCM solvation model<sup>[15]</sup> was used to model the solvation effects of dichloromethane/acetonitrile, while the single-point energies were evaluated at B3LYP-D3(BJ)/def2-TZVP level of theory. The DFT optimized structures are illustrated using VMD<sup>[16]</sup>. The spin density analysis was performed by using Multwfn<sup>[17]</sup>. The photophysical property of the macrocycles were studied using TDDFT at the CAM-B3LYP/ def2-SVP level of theory<sup>[18]</sup>, and the solvation effect was taken into consideration for both ground-state and excited state calculations using IEFPCM solvation model. Larger basis set def2-SVP were tested as well. As noticed by Jacquemin *et al.*<sup>[19]</sup>, calculation with basis set larger than 6-31+G(d) only changes the relative intensities by a trifling amount, we found that the adsorption and emission spectrum obtained through def2-SVP and def2-SVP is not significantly different. Hence the lower cost def2-SVP basis set was used. Conformational search was conducted with xTB and CREST programs<sup>[20, 21]</sup>. All reported bond lengths are in Ångstroms (Å).

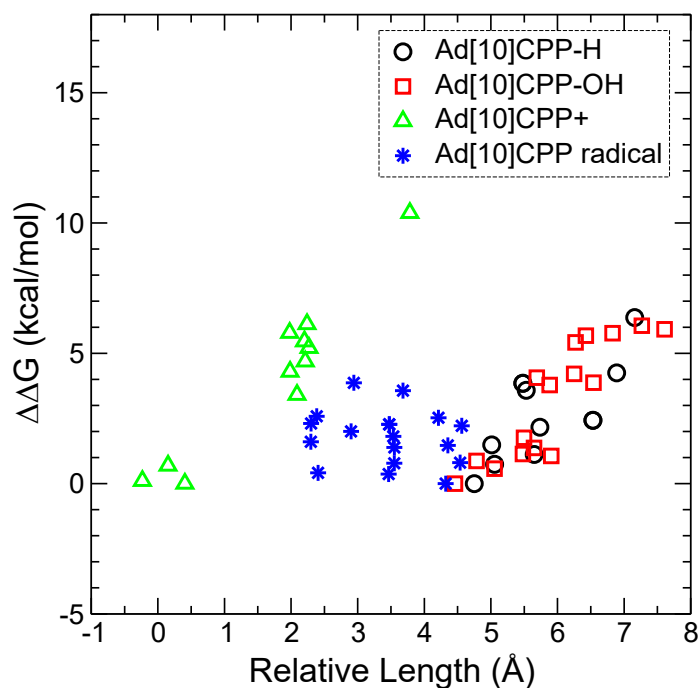

**Figure S74.** The length of long axis relative to short axis versus the free energy relative to that of the lowest conformation. Different conformations of Ad[10]CPP-H (black circle), Ad[10]CPP-OH (red square), Ad[10]CPP<sup>+</sup> cation (green triangle) and Ad[10]CPP<sup>•</sup>, that have been calculated.

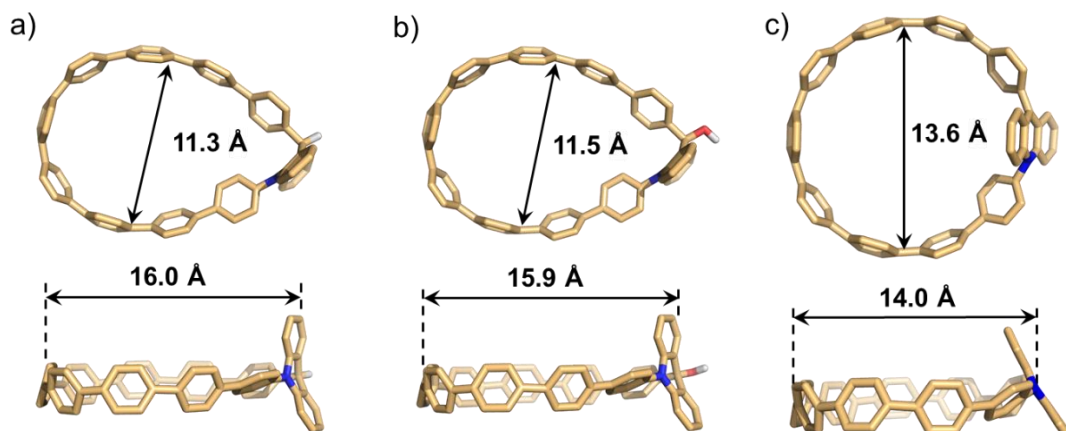

**Figure S75.** The DFT optimized structures of a) Ad[10]CPP-H, b) Ad[10]CPP-OH, and c) Ad[10]CPP<sup>+</sup>, at B3LYP-D3(BJ)/def2-SVP level of theory.

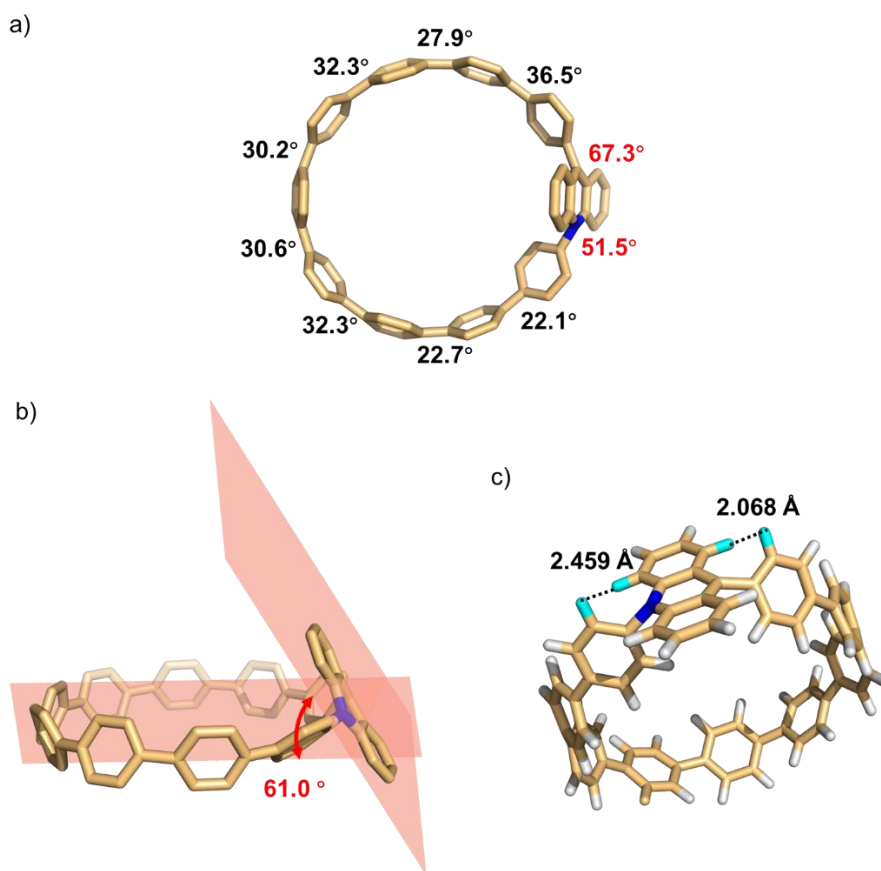

**Figure S76.** a) The torsion angles between the acridinium and adjacent phenylene moieties of Ad[10]CPP<sup>+</sup>, b) The dihedral angle between the acridinium and the ring plane of cycloparaphenylenes of Ad[10]CPP<sup>+</sup>, c) Schematic diagram of steric hindrance between the close contacted hydrogen atoms on acridinium and adjacent phenylene moieties of Ad[10]CPP<sup>+</sup>. These structures are energetically favorable at B3LYP-D3(BJ)/def2-SVP level of theory.

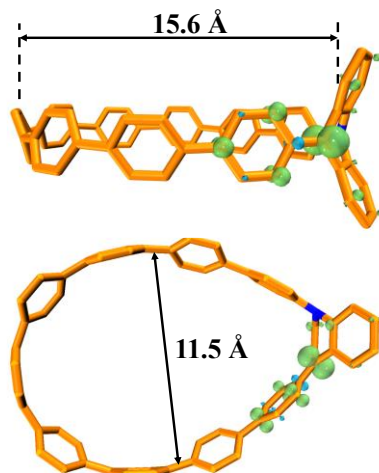

**Figure S77.** The DFT optimized structures of Ad[10]CPP<sup>+</sup>, and its spin density plot. The  $\alpha$  - and  $\beta$ - spin densities at B3LYP-D3(BJ)/def2-SVP level of theory are in green and blue, respectively.

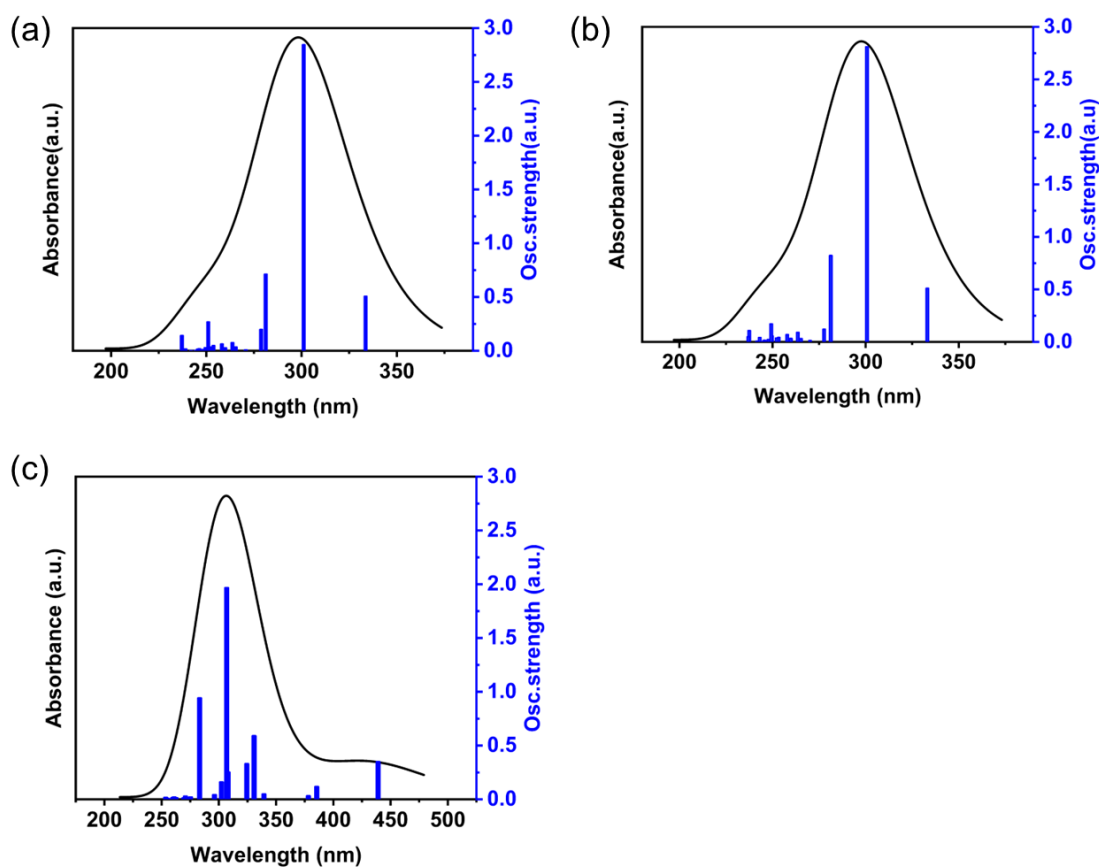

**Figure S78.** The UV-vis absorption spectra of DFT optimized structures of a) Ad[10]CPP-H, b) Ad[10]CPP-OH, c) Ad[10]CPP<sup>+</sup> at CAM-B3LYP/def2-SVP-IEFPCM(Dichloromethane) level of theory.

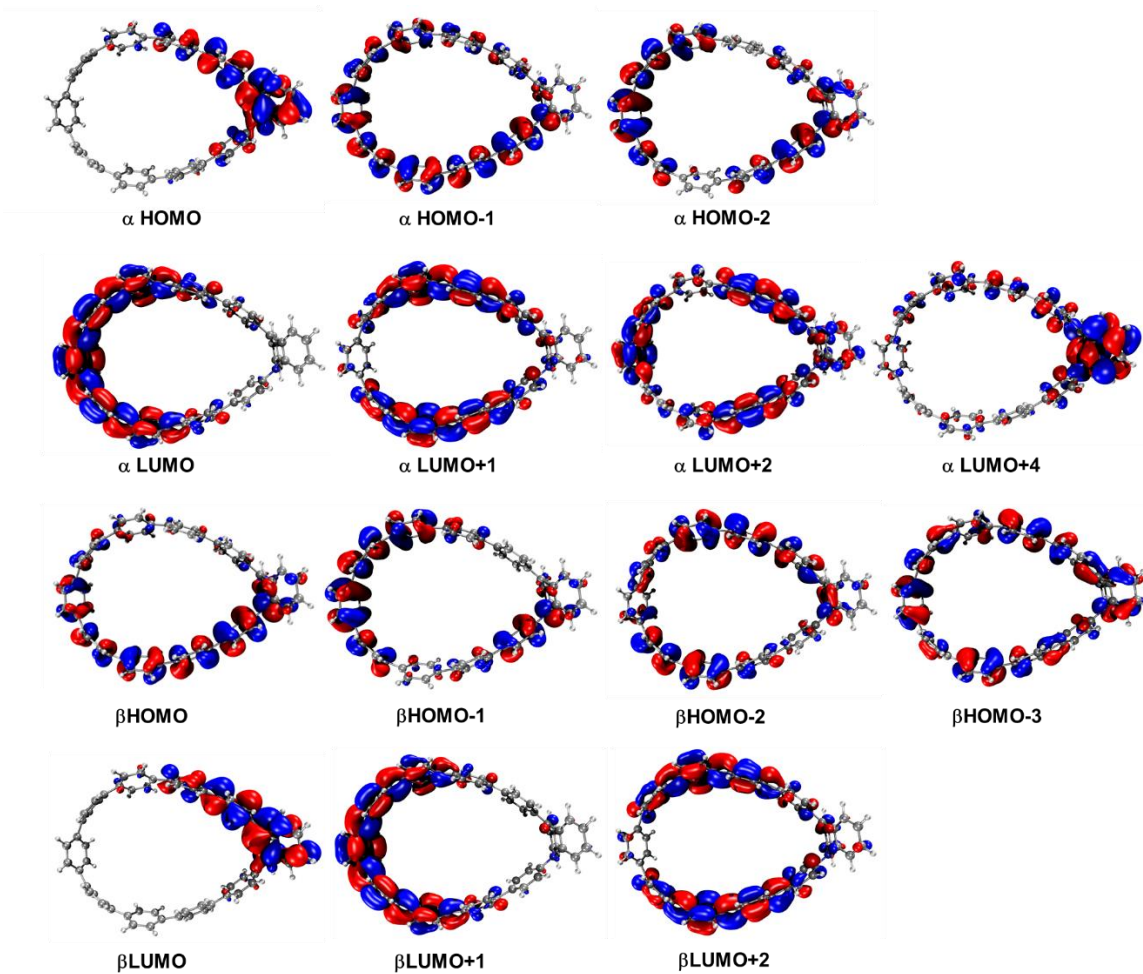

**Figure S79.** The frontier molecular orbital of Ad[10]CPP\* in ground states at CAM-B3LYP/def2-SVP-IEFPCM(Dichloromethane) level of theory.

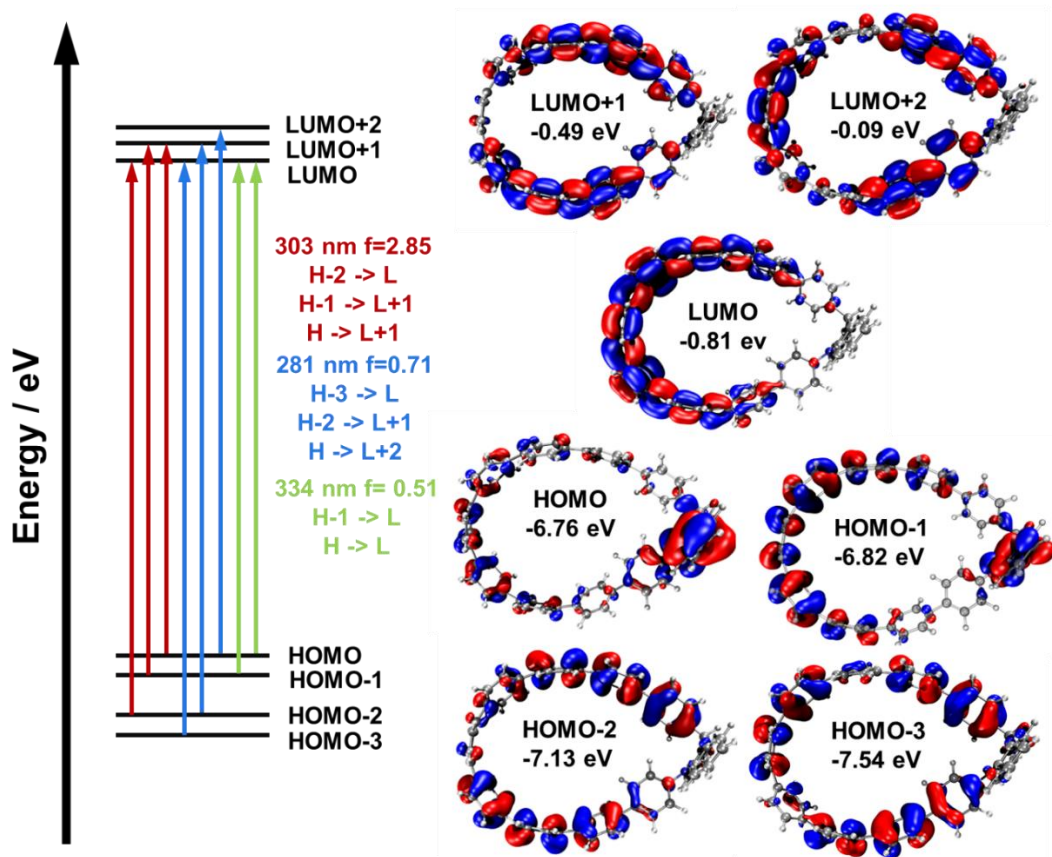

**Figure S80.** The frontier molecular orbitals and LUMO-HOMO gaps for Ad[10]CPP-H at the optimized geometries of  $S_0$  state calculated by DFT at the CAM-B3LYP/def2-SVP-IEFPCM(Dichloromethane) level.

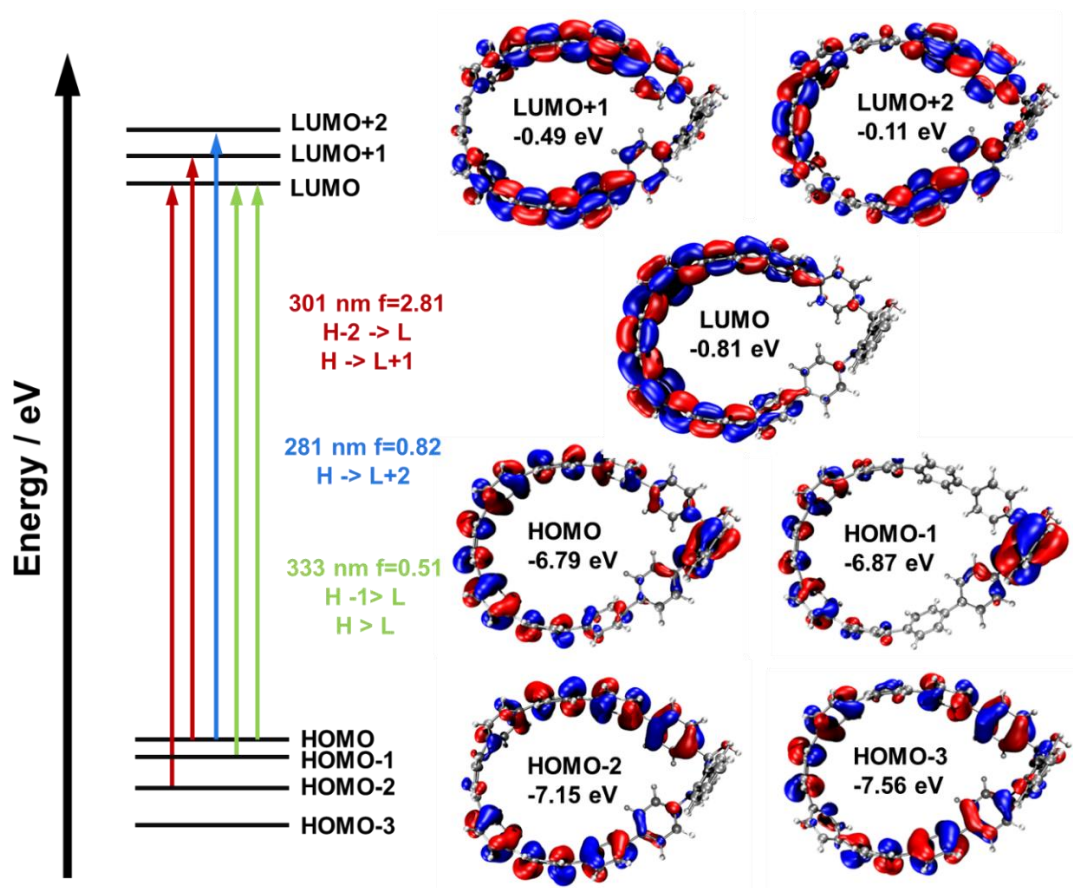

**Figure S81.** The frontier molecular orbitals and LUMO-HOMO gaps for Ad[10]CPP-OH at the optimized geometries of  $S_0$  state calculated by DFT at the CAM-B3LYP/def2-SVP-IEFPCM (Dichloromethane) level.

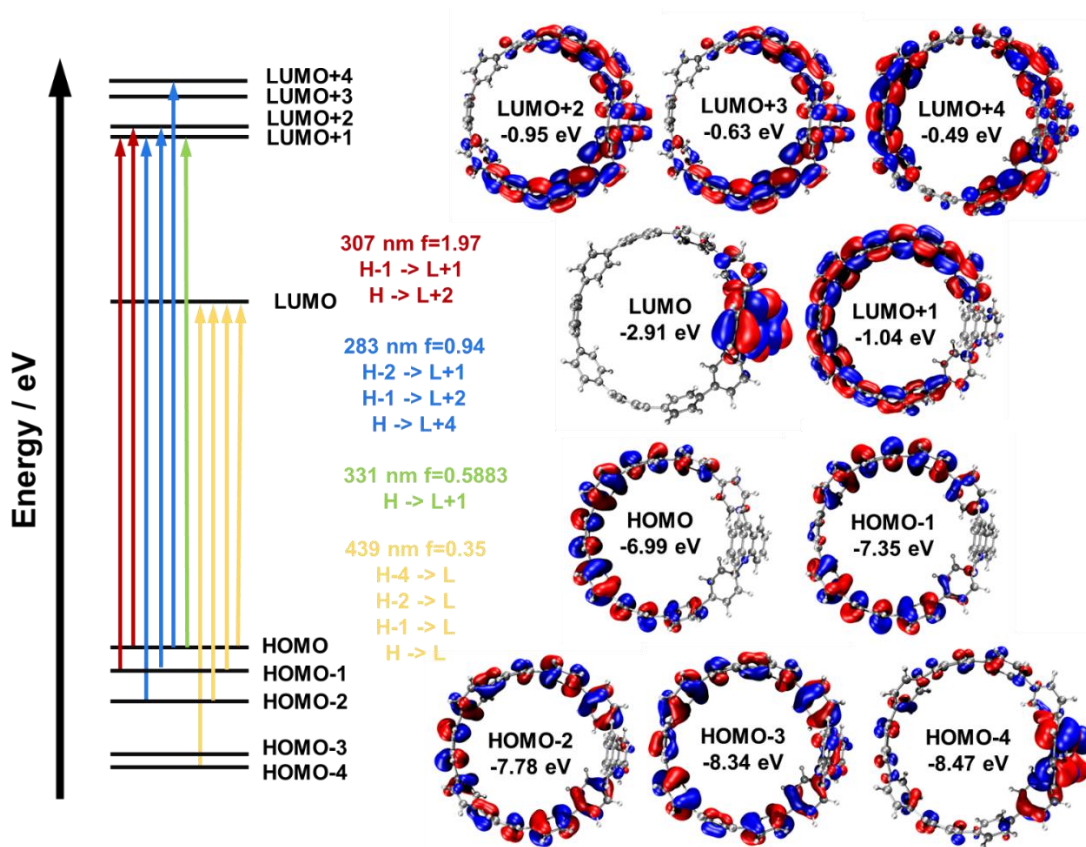

**Figure S82.** The frontier molecular orbitals and LUMO-HOMO gaps for Ad[10]CPP<sup>+</sup> at the optimized geometries of S<sub>0</sub> state calculated by DFT at the CAM-B3LYP/def2-SVP-IEFPCM(Dichloromethane) level.

**Table S6. Oscillator strengths (> 0.01) of Ad[10]CPP-H by applying TD-DFT calculations at the level of CAM-B3LYP/def2-SVP-IEFPCM (Dichloromethane).**

| Excited state | Energy (eV) | Wavelength (nm) | Osc. Strength | Major contributions |       |
|---------------|-------------|-----------------|---------------|---------------------|-------|
| 1             | 3.7166      | 333.6           | 0.5059        | H-1 -> L            | 50.7% |
|               |             |                 |               | H -> L              | 21.6% |
| 2             | 4.1174      | 301.13          | 2.8455        | H-2 -> L            | 38.0% |
|               |             |                 |               | H-1 -> L+1          | 22.3% |
|               |             |                 |               | H -> L+1            | 15.7% |
| 3             | 4.4096      | 281.17          | 0.7123        | H-3 -> L            | 15.1% |
|               |             |                 |               | H-2 -> L+1          | 16.3% |
|               |             |                 |               | H -> L+2            | 22.5% |
| 4             | 4.4476      | 278.76          | 0.1978        | H -> L+3            | 28.3% |
| 6             | 4.6705      | 265.46          | 0.0339        | H-1 -> L+5          | 20.8% |
| 7             | 4.7018      | 263.69          | 0.0747        | H -> L+4            | 23.5% |
|               |             |                 |               | H -> L+5            | 15.1% |
| 12            | 4.9395      | 251             | 0.2672        | H -> L+11           | 17.2% |
|               |             |                 |               | H -> L+12           | 28.9% |
| 20            | 5.2278      | 237.16          | 0.141         | H-3 -> L+2          | 16.7% |

**Table S7. Oscillator strengths (> 0.01) of Ad[10]CPP-OH by applying TD-DFT calculations at the level of CAM-B3LYP/def2-SVP-IEFPCM(Dichloromethane).**

| Excited state | Energy (eV) | Wavelength (nm) | Osc. Strength | Major contributions |       |
|---------------|-------------|-----------------|---------------|---------------------|-------|
| 1             | 3.7215      | 333.15          | 0.5113        | H-1 -> L            | 16.1% |
|               |             |                 |               | H -> L              | 56.3% |
| 2             | 4.1229      | 300.72          | 2.8106        | H-2 -> L            | 38.1% |
|               |             |                 |               | H -> L+1            | 34.0% |
| 3             | 4.4081      | 281.27          | 0.8226        | H -> L+2            | 22.7% |
| 4             | 4.4649      | 277.69          | 0.1207        | H-1 -> L+1          | 21.2% |
|               |             |                 |               | H-1 -> L+3          | 23.8% |
| 5             | 4.5897      | 270.14          | 0.013         | H-1 -> L+2          | 29.8% |
| 6             | 4.6746      | 265.23          | 0.031         | H -> L+5            | 26.8% |
| 7             | 4.7038      | 263.58          | 0.0905        | H-1 -> L+4          | 38.4% |
| 13            | 4.9745      | 249.24          | 0.1711        | H-1 -> L+10         | 23.2% |

**Table S8. Oscillator strengths (> 0.01) of Ad[10]CPP cation by applying TD-DFT calculations at the level of CAM-B3LYP/def2-SVP-IEFPCM(Dichloromethane).**

| Excited state | Energy (eV) | Wavelength (nm) | Osc. Strength | Major contributions                                                |
|---------------|-------------|-----------------|---------------|--------------------------------------------------------------------|
| 1             | 2.8241      | 439.02          | 0.3484        | H-4 -> L 15.3%<br>H-2 -> L 24.9%<br>H-1 -> L 16.7%<br>H -> L 24.7% |
| 2             | 3.2167      | 385.44          | 0.1154        | H-4 -> L 55.0%<br>H-1 -> L 22.9%                                   |
| 3             | 3.2786      | 378.16          | 0.0293        | H-1 -> L 31.6%<br>H -> L 49.4%                                     |
| 4             | 3.6538      | 339.33          | 0.0463        | H-2 -> L 41.8%<br>H -> L 18.8%                                     |
| 5             | 3.7492      | 330.69          | 0.5883        | H -> L+1 56.8%                                                     |
| 6             | 3.8224      | 324.36          | 0.3285        | H-16 -> L 39.9%<br>H-13 -> L 38.0%                                 |
| 7             | 4.0246      | 308.07          | 0.2501        | H-14 -> L 62.8%                                                    |
| 8             | 4.0412      | 306.8           | 1.9651        | H-1 -> L+1 35.8%<br>H -> L+2 24.1%                                 |
| 9             | 4.103       | 302.18          | 0.1575        | H-16 -> L 31.0%<br>H-3 -> L 16.1%                                  |
| 10            | 4.1868      | 296.13          | 0.0401        | H-15 -> L 17.1%<br>H-3 -> L 24.0%                                  |
| 11            | 4.3792      | 283.12          | 0.9401        | H-2 -> L+1 25.5%<br>H-1 -> L+2 20.7%<br>H -> L+4 27.0%             |
| 12            | 4.5056      | 275.18          | 0.0188        | H-15 -> L 48.9%                                                    |
| 13            | 4.5795      | 270.74          | 0.0275        | H-18 -> L 15.4%<br>H-12 -> L 19.1%                                 |

**Table S9. Oscillator strengths (> 0.01) of Ad[10]CPP\* by applying TD-DFT calculations at the level of CAM-B3LYP/def2-SVP-IEFPCM(Dichloromethane).**

| Excited state | Energy (eV) | Wavelength (nm) | Osc. Strength | Major contributions                                                                                  |
|---------------|-------------|-----------------|---------------|------------------------------------------------------------------------------------------------------|
| 2             | 2.5350      | 489.09          | 0.01170       | H $\beta$ -2 -> L $\beta$ 13.6%<br>H $\beta$ -> L $\beta$ 12.8%,<br>H $\alpha$ -3 -> L $\alpha$ 5.6% |

|    |        |        |         |                                                                                                                                                                                                                       |
|----|--------|--------|---------|-----------------------------------------------------------------------------------------------------------------------------------------------------------------------------------------------------------------------|
|    |        |        |         | H $\alpha$ -1 -> L $\alpha$ +1 5.5%                                                                                                                                                                                   |
| 3  | 2.5939 | 477.98 | 0.02080 | H $\beta$ -> L $\beta$ 17.8%<br>H $\beta$ -> L $\beta$ +2 10.5%<br>H $\beta$ -1 -> L $\beta$ 7.1%<br>H $\alpha$ -1 -> L $\alpha$ +1 6.6%                                                                              |
| 4  | 2.8176 | 440.03 | 0.06110 | H $\beta$ -> L $\beta$ 19.8%<br>H $\beta$ -1 -> L $\beta$ 11.9%<br>H $\beta$ -3 -> L $\beta$ 5.9%,<br>H $\alpha$ -1 -> L $\alpha$ +2 5.5%<br>H $\alpha$ -> L $\alpha$ +1 5.3%                                         |
| 6  | 3.1095 | 398.73 | 0.07280 | H $\alpha$ -> L $\alpha$ +3 9.4%<br>H $\alpha$ -> L $\alpha$ +1 5.8%                                                                                                                                                  |
| 9  | 3.3965 | 365.04 | 0.37400 | H $\beta$ -3 -> L $\beta$ 8.4%<br>H $\beta$ -2 -> L $\beta$ 7.2%<br>H $\alpha$ -> L $\alpha$ +1 6.7%                                                                                                                  |
| 10 | 3.4898 | 355.28 | 0.34630 | H $\beta$ -1 -> L $\beta$ 5.9%                                                                                                                                                                                        |
| 11 | 3.5472 | 349.53 | 0.02650 | H $\beta$ -9 -> L $\beta$ 16.8%<br>H $\alpha$ -> L $\alpha$ +6 13.4%<br>H $\beta$ -14 -> L $\beta$ 11.7%<br>H $\alpha$ -> L $\alpha$ +14 8.5%<br>H $\alpha$ -> L $\alpha$ +4 6.0%<br>H $\alpha$ -> L $\alpha$ +5 5.0% |
| 13 | 3.7145 | 333.78 | 0.23670 | H $\alpha$ -> L $\alpha$ +4 20.7%<br>H $\alpha$ -> L $\alpha$ +2 5.5%                                                                                                                                                 |
| 14 | 3.7518 | 330.47 | 0.85510 | H $\alpha$ -1 -> L $\alpha$ 13.1%<br>H $\beta$ -> L $\beta$ +1 10.5%<br>H $\beta$ -1 -> L $\beta$ +1 8.4%<br>H $\alpha$ -2 -> L $\alpha$ 5.7%                                                                         |
| 15 | 3.8037 | 325.96 | 0.23130 | H $\alpha$ -> L $\alpha$ +4 10.5%                                                                                                                                                                                     |
| 16 | 3.8221 | 324.39 | 0.23860 | H $\alpha$ -> L $\alpha$ +4 12.2%                                                                                                                                                                                     |
| 17 | 3.8517 | 321.89 | 0.03630 | H $\alpha$ -> L $\alpha$ +7 19.9%<br>H $\alpha$ -1 -> L $\alpha$ +7 8.3%<br>H $\beta$ -> L $\beta$ +8 6.2%<br>H $\beta$ -5 -> L $\beta$ 5.1%                                                                          |
| 18 | 3.9094 | 317.14 | 0.01700 | H $\beta$ -5 -> L $\beta$ 28.2%<br>H $\beta$ -11 -> L $\beta$ 15.7%<br>H $\alpha$ -> L $\alpha$ +6 6.9%                                                                                                               |
| 19 | 3.9633 | 312.83 | 0.06260 | H $\beta$ -11 -> L $\beta$ 11.8%<br>H $\alpha$ -> L $\alpha$ +6 6.7%<br>H $\beta$ -10 -> L $\beta$ 5.7%                                                                                                               |

|    |        |        |         |                                      |
|----|--------|--------|---------|--------------------------------------|
|    |        |        |         | H $\beta$ -14 -> L $\beta$ 5.3%      |
| 20 | 4.0280 | 307.81 | 1.66060 | H $\beta$ -> L $\beta$ +2 11.5%      |
|    |        |        |         | H $\alpha$ -1 -> L $\alpha$ +1 10.7% |
|    |        |        |         | H $\alpha$ -> L $\alpha$ 9.7%        |

### Cartesian coordinates of optimized structures

#### Ad[10]CPP-H

|   |             |             |             |
|---|-------------|-------------|-------------|
| C | -8.46637900 | -0.04352900 | 1.32995300  |
| C | -8.25703000 | 1.33153100  | 1.32259300  |
| C | -8.38998300 | 2.08143400  | 0.13881400  |
| C | -8.97780000 | 1.43015300  | -0.96453300 |
| C | -9.18832900 | 0.05334200  | -0.95695900 |
| C | -8.81856800 | -0.73216000 | 0.15377900  |
| H | -8.19381100 | -0.60672700 | 2.22409800  |
| H | -7.82939800 | 1.79769900  | 2.21183800  |
| H | -9.19184700 | 1.99503600  | -1.87477000 |
| H | -9.56164900 | -0.43131400 | -1.86205700 |
| C | -7.61605300 | 3.34021100  | 0.00608900  |
| C | -6.92650200 | 3.58558700  | -1.19671600 |
| C | -7.26682300 | 4.13478700  | 1.11631600  |
| C | -5.81483700 | 4.42199300  | -1.23324300 |
| H | -7.17091400 | 3.00249900  | -2.08629400 |
| C | -6.15155100 | 4.96801300  | 1.08115600  |
| H | -7.83106800 | 4.04130500  | 2.04698300  |
| C | -5.33963900 | 5.04980100  | -0.06751500 |
| H | -5.22592600 | 4.47330400  | -2.15104100 |
| H | -5.86501200 | 5.51324800  | 1.98334700  |
| C | -8.43460100 | -2.16007700 | 0.03032300  |
| C | -7.84178600 | -2.59170700 | -1.17138700 |
| C | -8.30546300 | -3.01236400 | 1.14569700  |
| C | -6.97727800 | -3.68090100 | -1.19685600 |
| H | -7.93027800 | -1.97604200 | -2.06803000 |
| C | -7.43868100 | -4.10248600 | 1.12030300  |
| H | -8.82439500 | -2.76865800 | 2.07559500  |
| C | -6.66517900 | -4.39054100 | -0.02220300 |
| H | -6.42125200 | -3.88260700 | -2.11392400 |
| H | -7.29979400 | -4.69126000 | 2.02991100  |
| C | -5.38038500 | -5.12919000 | 0.04580800  |
| C | -4.59968800 | -5.03611400 | 1.21375200  |
| C | -4.75934700 | -5.66875700 | -1.09814800 |

|   |             |             |             |
|---|-------------|-------------|-------------|
| C | -3.23086800 | -5.28866200 | 1.18991300  |
| H | -5.04084200 | -4.62993200 | 2.12559000  |
| C | -3.38861100 | -5.91265600 | -1.12501200 |
| H | -5.34635900 | -5.83556500 | -2.00396200 |
| C | -2.57902300 | -5.64091100 | -0.00523600 |
| H | -2.63991000 | -5.08041000 | 2.08414900  |
| H | -2.92691100 | -6.26660100 | -2.04968000 |
| C | -3.92927300 | 5.50318300  | -0.01197500 |
| C | -3.23681400 | 5.98675200  | -1.13846900 |
| C | -3.16597300 | 5.20993300  | 1.13350800  |
| C | -1.84461300 | 6.03939800  | -1.16167800 |
| H | -3.79624800 | 6.28640900  | -2.02765300 |
| C | -1.77620400 | 5.25896500  | 1.10838600  |
| H | -3.66284800 | 4.82510000  | 2.02590100  |
| C | -1.07704800 | 5.60775700  | -0.06195000 |
| H | -1.34233600 | 6.38776000  | -2.06663000 |
| H | -1.22477600 | 4.91576900  | 1.98519500  |
| C | -1.11058400 | -5.46540100 | -0.11509200 |
| C | -0.22965200 | -5.70526500 | 0.95523800  |
| C | -0.58785800 | -4.82938600 | -1.25699400 |
| C | 1.08307700  | -5.23324100 | 0.92790900  |
| H | -0.59139300 | -6.22866800 | 1.84320800  |
| C | 0.71752800  | -4.35001700 | -1.28042100 |
| H | -1.24253800 | -4.63204000 | -2.10795000 |
| C | 1.56381800  | -4.49406600 | -0.16728100 |
| H | 1.72380000  | -5.37714600 | 1.80119900  |
| H | 1.07748700  | -3.81578000 | -2.16235800 |
| C | 0.37831500  | 5.34204100  | -0.16044600 |
| C | 0.94873000  | 4.92801600  | -1.37910500 |
| C | 1.20954400  | 5.31942700  | 0.97511400  |
| C | 2.24623100  | 4.42711900  | -1.43986500 |
| H | 0.34375900  | 4.93488800  | -2.28769400 |
| C | 2.50297700  | 4.80774600  | 0.91636300  |
| H | 0.82453600  | 5.67228200  | 1.93383800  |
| C | 3.03836600  | 4.30282400  | -0.28362800 |
| H | 2.63963000  | 4.09338000  | -2.40194700 |
| H | 3.08647400  | 4.74286500  | 1.83664400  |
| C | 4.32618400  | 3.56753400  | -0.29710700 |
| C | 4.53365500  | 2.50544800  | -1.19377900 |
| C | 5.34821400  | 3.82941500  | 0.63580100  |
| C | 5.67855600  | 1.70962600  | -1.12984900 |

|   |            |             |             |
|---|------------|-------------|-------------|
| H | 3.76395100 | 2.26089300  | -1.92832200 |
| C | 6.48260100 | 3.02503500  | 0.70682400  |
| H | 5.25044900 | 4.67249800  | 1.32275400  |
| C | 6.65785200 | 1.93132900  | -0.15506800 |
| H | 5.79553000 | 0.88827400  | -1.83742400 |
| H | 7.23798600 | 3.23853100  | 1.46662300  |
| C | 2.85469300 | -3.76524000 | -0.11150800 |
| C | 2.89291400 | -2.42407600 | -0.53895600 |
| C | 4.03404600 | -4.32872200 | 0.40451200  |
| C | 4.05553100 | -1.66820500 | -0.43502600 |
| H | 1.98080400 | -1.95621300 | -0.91410000 |
| C | 5.21100200 | -3.57893700 | 0.48833000  |
| H | 4.03596000 | -5.37307600 | 0.72496500  |
| C | 5.22380400 | -2.23885700 | 0.08293400  |
| H | 4.06917700 | -0.61897800 | -0.73339700 |
| H | 6.12905600 | -4.03110300 | 0.86845900  |
| C | 6.41753800 | -1.41644900 | 2.63159500  |
| C | 6.80668300 | -0.87064400 | 1.39647400  |
| C | 6.91993300 | -0.88907300 | 3.82129800  |
| N | 6.39491100 | -1.42412200 | 0.16926600  |
| C | 7.65614800 | 0.25711000  | 1.37651200  |
| C | 7.82444500 | 0.17576700  | 3.80295700  |
| H | 6.61010300 | -1.32990200 | 4.77190600  |
| C | 7.15114700 | -1.18461800 | -0.99222600 |
| C | 7.84806900 | 0.97646400  | 0.05388300  |
| C | 8.17913100 | 0.74264400  | 2.57698800  |
| H | 8.23574400 | 0.57173400  | 4.73372300  |
| C | 7.11132800 | -2.06914800 | -2.08430000 |
| C | 7.97165800 | -0.03849600 | -1.05504600 |
| H | 8.85774700 | 1.59953900  | 2.54733100  |
| C | 7.90200600 | -1.82901500 | -3.20759400 |
| H | 6.46719300 | -2.94763200 | -2.04400500 |
| C | 8.77117700 | 0.17051600  | -2.18050900 |
| C | 8.74802600 | -0.71691700 | -3.25861300 |
| H | 7.86336900 | -2.52760800 | -4.04694500 |
| H | 9.39981100 | 1.06441700  | -2.21891500 |
| H | 9.37259900 | -0.53547200 | -4.13569100 |
| H | 5.72980600 | -2.26044900 | 2.66105800  |
| H | 8.76515300 | 1.58418400  | 0.10462700  |

Ad[10]CPP-OH

|   |             |             |             |
|---|-------------|-------------|-------------|
| C | -8.53473200 | 0.08112500  | 1.36093900  |
| C | -8.29995900 | 1.45214100  | 1.34930300  |
| C | -8.43738700 | 2.20384900  | 0.16724600  |
| C | -9.05046700 | 1.56227200  | -0.92795700 |
| C | -9.28642000 | 0.18967000  | -0.91607600 |
| C | -8.91816200 | -0.60148300 | 0.19105700  |
| H | -8.26075200 | -0.48667200 | 2.25176100  |
| H | -7.85173000 | 1.91156300  | 2.23193500  |
| H | -9.26673200 | 2.13064300  | -1.83548500 |
| H | -9.68155200 | -0.28877300 | -1.81519400 |
| C | -7.64972800 | 3.45277300  | 0.02418300  |
| C | -6.96960300 | 3.68719600  | -1.18604500 |
| C | -7.28288400 | 4.24844800  | 1.12783400  |
| C | -5.85260400 | 4.51547900  | -1.23711500 |
| H | -7.22733700 | 3.10230000  | -2.07067600 |
| C | -6.16304600 | 5.07487500  | 1.07754000  |
| H | -7.83849900 | 4.16272500  | 2.06444400  |
| C | -5.36222200 | 5.14709800  | -0.07963200 |
| H | -5.27291300 | 4.55822100  | -2.16109600 |
| H | -5.86504800 | 5.62292000  | 1.97425300  |
| C | -8.57215800 | -2.03880000 | 0.06588000  |
| C | -8.00587900 | -2.48853500 | -1.14193400 |
| C | -8.45550800 | -2.89344600 | 1.18077500  |
| C | -7.17586900 | -3.60401200 | -1.17646200 |
| H | -8.08619800 | -1.87097400 | -2.03805100 |
| C | -7.62359500 | -4.01012800 | 1.14619100  |
| H | -8.95621000 | -2.63339500 | 2.11621600  |
| C | -6.87344700 | -4.32343700 | -0.00523300 |
| H | -6.63712600 | -3.82341400 | -2.09975700 |
| H | -7.49292100 | -4.60267400 | 2.05455300  |
| C | -5.61352200 | -5.10482600 | 0.04819000  |
| C | -4.81803400 | -5.04066600 | 1.20801000  |
| C | -5.02295700 | -5.66322100 | -1.10296100 |
| C | -3.45876100 | -5.33852900 | 1.16916200  |
| H | -5.23562500 | -4.62199600 | 2.12525600  |
| C | -3.66146300 | -5.95253500 | -1.14487600 |
| H | -5.62473800 | -5.80891100 | -2.00268900 |
| C | -2.83141900 | -5.70946300 | -0.03349800 |
| H | -2.85197900 | -5.15134300 | 2.05741200  |
| H | -3.22174400 | -6.31973200 | -2.07508400 |
| C | -3.95001100 | 5.59688900  | -0.04212700 |

|   |             |             |             |
|---|-------------|-------------|-------------|
| C | -3.26535900 | 6.05393300  | -1.18462900 |
| C | -3.17782800 | 5.32614600  | 1.10298200  |
| C | -1.87332000 | 6.09657000  | -1.22256000 |
| H | -3.83118200 | 6.33846500  | -2.07467200 |
| C | -1.78784400 | 5.36753700  | 1.06427200  |
| H | -3.66793800 | 4.96361300  | 2.00834300  |
| C | -1.09851600 | 5.68359000  | -0.12091600 |
| H | -1.37664400 | 6.42033900  | -2.13974700 |
| H | -1.22885700 | 5.04120700  | 1.94292200  |
| C | -1.35968000 | -5.57658700 | -0.15844100 |
| C | -0.47598200 | -5.83755900 | 0.90471900  |
| C | -0.83058900 | -4.95466300 | -1.30525800 |
| C | 0.84593100  | -5.39266900 | 0.86875200  |
| H | -0.84261900 | -6.35288100 | 1.79537200  |
| C | 0.48429500  | -4.50245200 | -1.33746500 |
| H | -1.48660900 | -4.74333700 | -2.15178800 |
| C | 1.33351800  | -4.66127200 | -0.22862400 |
| H | 1.48881800  | -5.54874200 | 1.73836300  |
| H | 0.84899400  | -3.97484800 | -2.22147700 |
| C | 0.35161000  | 5.39506100  | -0.23035300 |
| C | 1.20439300  | 5.41780000  | 0.88895600  |
| C | 0.88870800  | 4.90721700  | -1.43676700 |
| C | 2.48743900  | 4.87903200  | 0.83236400  |
| H | 0.84345700  | 5.82772100  | 1.83444900  |
| C | 2.17374700  | 4.37531100  | -1.49498000 |
| H | 0.26434600  | 4.87849300  | -2.33178900 |
| C | 2.98519900  | 4.29677000  | -0.34840200 |
| H | 3.09095700  | 4.85135400  | 1.74179400  |
| H | 2.54172100  | 3.97926400  | -2.44353100 |
| C | 4.24983900  | 3.52265400  | -0.34470700 |
| C | 5.32253700  | 3.83564600  | 0.51277700  |
| C | 4.37790600  | 2.37427700  | -1.14381100 |
| C | 6.43313000  | 3.00166500  | 0.61397300  |
| H | 5.28352300  | 4.74617700  | 1.11460900  |
| C | 5.49497500  | 1.54362700  | -1.04885900 |
| H | 3.56851100  | 2.09459200  | -1.82091200 |
| C | 6.52171100  | 1.82222700  | -0.14121900 |
| H | 7.24347900  | 3.25948100  | 1.29625000  |
| H | 5.55311600  | 0.65773800  | -1.68074500 |
| C | 2.63093600  | -3.94404200 | -0.17173500 |
| C | 2.67507100  | -2.59960000 | -0.58790900 |

|   |            |             |             |
|---|------------|-------------|-------------|
| C | 3.80644300 | -4.51559600 | 0.34445500  |
| C | 3.83784300 | -1.84656500 | -0.46731200 |
| H | 1.76622000 | -2.12606600 | -0.96363600 |
| C | 4.98350300 | -3.76792400 | 0.44574700  |
| H | 3.80370200 | -5.56239400 | 0.65673100  |
| C | 5.00011300 | -2.42354100 | 0.05618300  |
| H | 3.85262900 | -0.79358500 | -0.75145200 |
| H | 5.89695500 | -4.22261400 | 0.83407600  |
| C | 6.02387500 | -1.54447800 | 2.63334100  |
| C | 6.49798000 | -1.01994600 | 1.41712200  |
| C | 6.42698400 | -0.98772300 | 3.84542300  |
| N | 6.16680900 | -1.60560700 | 0.18354200  |
| C | 7.34021600 | 0.11222400  | 1.43861900  |
| C | 7.31313600 | 0.09307400  | 3.87189300  |
| H | 6.05107900 | -1.41386100 | 4.77872700  |
| C | 6.96029900 | -1.35131600 | -0.94581500 |
| C | 7.66643900 | 0.82829000  | 0.12744300  |
| C | 7.75394900 | 0.63850200  | 2.66636000  |
| H | 7.64114600 | 0.51960800  | 4.82207100  |
| C | 6.95327400 | -2.22681000 | -2.04734200 |
| C | 7.78023000 | -0.20414200 | -0.98145700 |
| H | 8.41464000 | 1.50675100  | 2.66014500  |
| C | 7.76833800 | -1.97454300 | -3.14912300 |
| H | 6.31351800 | -3.10911100 | -2.02856800 |
| C | 8.59835300 | 0.02501900  | -2.09074000 |
| C | 8.60548000 | -0.85432900 | -3.17403300 |
| H | 7.75328700 | -2.66775100 | -3.99369800 |
| H | 9.21188600 | 0.92739800  | -2.09596800 |
| H | 9.24439900 | -0.65914700 | -4.03778000 |
| H | 5.34733400 | -2.39781300 | 2.62751100  |
| O | 8.85242900 | 1.60096800  | 0.24477800  |
| H | 9.56347500 | 0.99207100  | 0.49167900  |

**Ad[10]CPP<sup>+</sup>**

|   |             |             |             |
|---|-------------|-------------|-------------|
| C | -7.44959900 | -0.10875000 | 1.21464900  |
| C | -7.30582200 | 1.27491900  | 1.20602400  |
| C | -7.49222500 | 2.02015200  | 0.02685200  |
| C | -8.00999400 | 1.33468700  | -1.08990100 |
| C | -8.15556300 | -0.05050300 | -1.08057800 |
| C | -7.78734200 | -0.81445200 | 0.04480000  |
| H | -7.16862200 | -0.65850300 | 2.11451900  |

|   |             |             |             |
|---|-------------|-------------|-------------|
| H | -6.91716600 | 1.76633000  | 2.09962000  |
| H | -8.24943000 | 1.88786600  | -2.00075600 |
| H | -8.50601600 | -0.55358300 | -1.98441500 |
| C | -6.89092600 | 3.37200100  | -0.07231300 |
| C | -6.23895900 | 3.75081400  | -1.26088200 |
| C | -6.70672600 | 4.20077100  | 1.05284800  |
| C | -5.30907900 | 4.78607100  | -1.27474500 |
| H | -6.36388300 | 3.14581200  | -2.16052300 |
| C | -5.77280200 | 5.23294200  | 1.04116600  |
| H | -7.26097900 | 3.99563200  | 1.97112500  |
| C | -4.98642100 | 5.48985800  | -0.09944800 |
| H | -4.73332900 | 4.96209100  | -2.18531200 |
| H | -5.61298800 | 5.81595900  | 1.95091800  |
| C | -7.47275300 | -2.26155800 | -0.03945700 |
| C | -6.91989600 | -2.77565500 | -1.22714000 |
| C | -7.44162500 | -3.09621800 | 1.09577100  |
| C | -6.20459500 | -3.96926400 | -1.23135000 |
| H | -6.93449300 | -2.17072300 | -2.13534200 |
| C | -6.72283600 | -4.28896400 | 1.09296100  |
| H | -7.93579000 | -2.77609000 | 2.01556300  |
| C | -6.00764900 | -4.70415600 | -0.04751300 |
| H | -5.68033700 | -4.26298400 | -2.14257900 |
| H | -6.66662400 | -4.87844100 | 2.01089300  |
| C | -4.87047300 | -5.65302400 | 0.02536200  |
| C | -4.05654100 | -5.65405100 | 1.17354800  |
| C | -4.39408700 | -6.35723900 | -1.09862600 |
| C | -2.75892500 | -6.15394700 | 1.13605200  |
| H | -4.39314600 | -5.13496100 | 2.07251700  |
| C | -3.09512900 | -6.85766400 | -1.13643400 |
| H | -5.02918600 | -6.45828700 | -1.98130600 |
| C | -2.21470400 | -6.68058500 | -0.05040700 |
| H | -2.11975500 | -6.00922400 | 2.00867100  |
| H | -2.74120200 | -7.34255200 | -2.04890900 |
| C | -3.70321800 | 6.22653300  | -0.02858300 |
| C | -3.10445300 | 6.82815200  | -1.15428500 |
| C | -2.91598900 | 6.11907400  | 1.13377900  |
| C | -1.74633800 | 7.13231900  | -1.17146200 |
| H | -3.70165700 | 7.01020000  | -2.05016100 |
| C | -1.55967900 | 6.42146100  | 1.11632900  |
| H | -3.34269600 | 5.67252400  | 2.03325600  |
| C | -0.92035300 | 6.85260500  | -0.06287700 |

|   |             |             |             |
|---|-------------|-------------|-------------|
| H | -1.31266300 | 7.55043900  | -2.08211900 |
| H | -0.96949000 | 6.20063600  | 2.00660900  |
| C | -0.74057800 | -6.73290100 | -0.20333800 |
| C | 0.13053200  | -6.86242100 | 0.89640500  |
| C | -0.16403900 | -6.37597500 | -1.43920000 |
| C | 1.46056400  | -6.45246900 | 0.81446200  |
| H | -0.25786600 | -7.20950000 | 1.85573500  |
| C | 1.16136400  | -5.96748400 | -1.52313400 |
| H | -0.79274800 | -6.30675200 | -2.32813300 |
| C | 1.97478000  | -5.90766200 | -0.37645200 |
| H | 2.07458000  | -6.45757200 | 1.71836900  |
| H | 1.55006100  | -5.61771900 | -2.48219300 |
| C | 0.55065900  | 6.73582200  | -0.17497100 |
| C | 1.38669600  | 6.68318200  | 0.95999700  |
| C | 1.14685500  | 6.42704600  | -1.41672300 |
| C | 2.66634300  | 6.14396400  | 0.88902200  |
| H | 1.00202000  | 6.99613600  | 1.93173800  |
| C | 2.42702100  | 5.89539800  | -1.49026900 |
| H | 0.56067200  | 6.50554700  | -2.33314800 |
| C | 3.18244100  | 5.64584300  | -0.32554300 |
| H | 3.23098500  | 6.01871700  | 1.81479900  |
| H | 2.81815300  | 5.60738700  | -2.46770300 |
| C | 4.29150400  | 4.67424400  | -0.31941200 |
| C | 5.22589100  | 4.57388500  | 0.74007100  |
| C | 4.32989200  | 3.65653600  | -1.29547500 |
| C | 5.98276000  | 3.42472800  | 0.93155300  |
| H | 5.32476200  | 5.39463600  | 1.45238100  |
| C | 5.10395200  | 2.51953400  | -1.12479200 |
| H | 3.65468700  | 3.69885800  | -2.14976200 |
| C | 5.87118900  | 2.32772500  | 0.04875000  |
| H | 6.66687100  | 3.37348600  | 1.78026900  |
| H | 5.01580400  | 1.70798400  | -1.84850200 |
| C | 3.17605800  | -5.04099900 | -0.35045000 |
| C | 3.09075200  | -3.80214500 | -1.01932200 |
| C | 4.32139100  | -5.28552800 | 0.43142600  |
| C | 4.04012300  | -2.81162000 | -0.82238300 |
| H | 2.21402900  | -3.58171300 | -1.62901900 |
| C | 5.29605500  | -4.29747900 | 0.62137000  |
| H | 4.44228600  | -6.25332400 | 0.92219000  |
| C | 5.12086100  | -3.04324400 | 0.03480600  |
| H | 3.91605900  | -1.82978800 | -1.28370500 |

|   |            |             |             |
|---|------------|-------------|-------------|
| H | 6.16349800 | -4.49253200 | 1.25514100  |
| C | 4.99496400 | -1.80965500 | 2.60015200  |
| C | 5.58925600 | -1.15496300 | 1.49591000  |
| C | 4.61554800 | -1.09513100 | 3.71766800  |
| N | 5.92004300 | -1.87186900 | 0.35677800  |
| C | 5.75395100 | 0.27265500  | 1.52135900  |
| C | 4.76716500 | 0.30784500  | 3.76081000  |
| H | 4.18101700 | -1.62369400 | 4.56867000  |
| C | 6.65531900 | -1.28945500 | -0.65199000 |
| C | 6.22743900 | 0.93123000  | 0.34138100  |
| C | 5.29833600 | 0.97054000  | 2.67897400  |
| H | 4.44469100 | 0.86703100  | 4.64064600  |
| C | 7.17039700 | -2.07604000 | -1.70724900 |
| C | 6.83754400 | 0.13032700  | -0.66624300 |
| H | 5.37097500 | 2.05307000  | 2.70434200  |
| C | 7.89491100 | -1.47820600 | -2.71949000 |
| H | 7.00533000 | -3.15291500 | -1.69888000 |
| C | 7.59002300 | 0.70568800  | -1.73252500 |
| C | 8.11714100 | -0.07988300 | -2.73187100 |
| H | 8.31421200 | -2.09845500 | -3.51459500 |
| H | 7.75919500 | 1.78271300  | -1.72341300 |
| H | 8.71194000 | 0.36928100  | -3.52889800 |
| H | 4.84579500 | -2.88547300 | 2.56940000  |

**Ad[10]CPP**

|   |            |             |             |
|---|------------|-------------|-------------|
| C | 9.08675400 | -0.95717400 | -0.96938600 |
| C | 9.15256400 | 0.43397200  | -0.96560200 |
| C | 8.70221600 | 1.17956300  | 0.14264000  |
| C | 8.41770600 | 0.46172700  | 1.31952500  |
| C | 8.35211800 | -0.92793800 | 1.31579100  |
| C | 8.56774000 | -1.66290400 | 0.13491100  |
| H | 9.36042500 | -1.49967700 | -1.87726700 |
| H | 9.47648300 | 0.95287100  | -1.87074600 |
| H | 8.08602300 | 0.99683600  | 2.21103300  |
| H | 7.97151300 | -1.43456200 | 2.20439400  |
| C | 8.18876800 | 2.56566500  | 0.01618800  |
| C | 7.99884200 | 3.41168000  | 1.12716000  |
| C | 7.55625500 | 2.93937400  | -1.18468400 |
| C | 7.05843800 | 4.43880900  | 1.09598200  |
| H | 8.53767200 | 3.21283300  | 2.05641600  |
| C | 6.61785100 | 3.96553400  | -1.21579900 |

|   |             |             |             |
|---|-------------|-------------|-------------|
| H | 7.68494000  | 2.32290900  | -2.07593300 |
| C | 6.26736100  | 4.66773100  | -0.04772400 |
| H | 6.88324400  | 5.02582000  | 2.00038700  |
| H | 6.04559900  | 4.12132100  | -2.13189400 |
| C | 7.92930200  | -2.99538200 | 0.00211900  |
| C | 7.67077400  | -3.82941100 | 1.10806100  |
| C | 7.25960200  | -3.30149800 | -1.19773700 |
| C | 6.64629300  | -4.77258300 | 1.07316500  |
| H | 8.22881400  | -3.68505900 | 2.03608700  |
| C | 6.23671600  | -4.24351100 | -1.23228000 |
| H | 7.43687500  | -2.69050400 | -2.08447300 |
| C | 5.83462500  | -4.92526100 | -0.06882400 |
| H | 6.42603700  | -5.35099400 | 1.97321200  |
| H | 5.64898000  | -4.34290800 | -2.14646400 |
| C | 4.47269900  | -5.50912400 | -0.00829700 |
| C | 3.79789800  | -5.97402000 | -1.15404600 |
| C | 3.71089700  | -5.35532400 | 1.16545800  |
| C | 2.41241100  | -6.11563200 | -1.16713800 |
| H | 4.36137400  | -6.17699600 | -2.06746300 |
| C | 2.32696900  | -5.50174600 | 1.15378200  |
| H | 4.19239700  | -4.99538600 | 2.07639800  |
| C | 1.63639100  | -5.80560200 | -0.03343000 |
| H | 1.91675000  | -6.42955300 | -2.08850500 |
| H | 1.76327100  | -5.25924100 | 2.05671200  |
| C | 4.95237700  | 5.35075400  | 0.01344400  |
| C | 4.17705000  | 5.24360400  | 1.18366200  |
| C | 4.31503600  | 5.86618300  | -1.13249500 |
| C | 2.80485500  | 5.47504900  | 1.16542300  |
| H | 4.62993100  | 4.85043200  | 2.09547200  |
| C | 2.94097500  | 6.09099600  | -1.15302300 |
| H | 4.89511000  | 6.03833600  | -2.04176400 |
| C | 2.14097300  | 5.82052500  | -0.02570100 |
| H | 2.22254700  | 5.26326700  | 2.06429100  |
| H | 2.47067300  | 6.43720600  | -2.07613800 |
| C | 0.17288700  | -5.58613700 | -0.11033400 |
| C | -0.38172000 | -4.98615200 | -1.25625700 |
| C | -0.67867400 | -5.77257200 | 0.99443800  |
| C | -1.68632600 | -4.50176000 | -1.26066000 |
| H | 0.25052600  | -4.80958600 | -2.12865200 |
| C | -1.98650800 | -5.29320000 | 0.98720800  |
| H | -0.30284800 | -6.28362700 | 1.88377300  |

|   |             |             |             |
|---|-------------|-------------|-------------|
| C | -2.50665700 | -4.59608900 | -0.12101300 |
| H | -2.04391600 | -3.96095100 | -2.13882200 |
| H | -2.61269400 | -5.44542400 | 1.86881600  |
| C | 0.67044100  | 5.66785300  | -0.11666100 |
| C | 0.10348200  | 5.09209300  | -1.26940300 |
| C | -0.18463100 | 5.88538100  | 0.98051600  |
| C | -1.21591300 | 4.65322100  | -1.28562900 |
| H | 0.73594500  | 4.89512500  | -2.13705100 |
| C | -1.50659700 | 5.44946700  | 0.96295800  |
| H | 0.20107100  | 6.38233000  | 1.87349300  |
| C | -2.04210000 | 4.76868200  | -0.15024400 |
| H | -1.58061500 | 4.12802200  | -2.16960700 |
| H | -2.13159400 | 5.62293600  | 1.84105900  |
| C | -3.34889400 | 4.08256700  | -0.09699500 |
| C | -4.06514300 | 3.73725200  | -1.26349700 |
| C | -3.86924900 | 3.60424500  | 1.12528700  |
| C | -5.19011100 | 2.92979500  | -1.22189500 |
| H | -3.71806100 | 4.09464800  | -2.23468200 |
| C | -4.99666000 | 2.80153600  | 1.17789000  |
| H | -3.33242000 | 3.80596900  | 2.05381800  |
| C | -5.70428600 | 2.41250000  | 0.00296900  |
| H | -5.65723700 | 2.65245900  | -2.16394300 |
| H | -5.29738800 | 2.40060300  | 2.14372200  |
| C | -3.79947700 | -3.87694600 | -0.06019500 |
| C | -4.25604100 | -3.31430500 | 1.14470300  |
| C | -4.56522300 | -3.60393000 | -1.20703100 |
| C | -5.37902800 | -2.49535300 | 1.20025000  |
| H | -3.68196700 | -3.46469300 | 2.06110800  |
| C | -5.69216100 | -2.78755600 | -1.16766800 |
| H | -4.27243000 | -4.03437200 | -2.16700300 |
| C | -6.11615300 | -2.19277100 | 0.03773000  |
| H | -5.64846600 | -2.04289000 | 2.15229200  |
| H | -6.22339500 | -2.58906900 | -2.09541700 |
| C | -8.26088600 | -1.22516600 | -2.14176400 |
| C | -7.61026500 | -0.57556700 | -1.08961100 |
| C | -8.66675500 | -0.50696600 | -3.26811600 |
| N | -7.19697000 | -1.27619500 | 0.07858900  |
| C | -7.37663800 | 0.82538200  | -1.13561600 |
| C | -8.45559000 | 0.87457400  | -3.32525400 |
| H | -9.17485400 | -1.02169400 | -4.08648500 |
| C | -7.48617400 | -0.56816800 | 1.27719400  |

|   |             |             |             |
|---|-------------|-------------|-------------|
| C | -6.76431700 | 1.43828300  | 0.04910500  |
| C | -7.83204600 | 1.53271500  | -2.26690500 |
| H | -8.80323400 | 1.44681500  | -4.18831100 |
| C | -8.00242300 | -1.21963400 | 2.40061800  |
| C | -7.24829100 | 0.82948000  | 1.29260400  |
| H | -7.73173600 | 2.61800900  | -2.29305900 |
| C | -8.28208600 | -0.49732400 | 3.56107600  |
| H | -8.18225400 | -2.29492200 | 2.35211300  |
| C | -7.57115800 | 1.54242100  | 2.46605500  |
| C | -8.07209800 | 0.88699900  | 3.58835100  |
| H | -8.68736400 | -1.01016000 | 4.43608500  |
| H | -7.45580100 | 2.62696200  | 2.47804600  |
| H | -8.32024500 | 1.46053200  | 4.48426800  |
| H | -8.46282200 | -2.29404600 | -2.06151800 |

**Ad[10]CPP-H (optimized in dichloromethane)**

|   |             |             |             |
|---|-------------|-------------|-------------|
| C | -8.36212500 | -0.06151300 | 1.32745200  |
| C | -8.16578300 | 1.31295700  | 1.31783700  |
| C | -8.31022200 | 2.05705400  | 0.13905700  |
| C | -8.88613500 | 1.40093400  | -0.96015800 |
| C | -9.08362100 | 0.02468700  | -0.95028400 |
| C | -8.71156300 | -0.75162800 | 0.15868900  |
| H | -8.08950400 | -0.61744700 | 2.22575500  |
| H | -7.74793200 | 1.78296500  | 2.20938700  |
| H | -9.10038000 | 1.95741000  | -1.87509500 |
| H | -9.44655000 | -0.46157100 | -1.85830800 |
| C | -7.55911000 | 3.33505800  | 0.00827700  |
| C | -6.87916200 | 3.59577900  | -1.18961900 |
| C | -7.23145500 | 4.13421500  | 1.11442000  |
| C | -5.79253000 | 4.46017600  | -1.22692500 |
| H | -7.11023400 | 3.01258500  | -2.08237200 |
| C | -6.14144800 | 4.99619300  | 1.07827400  |
| H | -7.78529200 | 4.02341400  | 2.04902200  |
| C | -5.33700900 | 5.09983900  | -0.06685600 |
| H | -5.21160100 | 4.52921800  | -2.14825500 |
| H | -5.86878000 | 5.54169300  | 1.98420400  |
| C | -8.33196000 | -2.18612300 | 0.04241100  |
| C | -7.75088400 | -2.62700500 | -1.15449000 |
| C | -8.20777400 | -3.02966400 | 1.15755500  |
| C | -6.90351700 | -3.72650600 | -1.17936700 |
| H | -7.83831700 | -2.01962600 | -2.05654000 |

|   |             |             |             |
|---|-------------|-------------|-------------|
| C | -7.35826000 | -4.13016700 | 1.13282600  |
| H | -8.71144500 | -2.77432200 | 2.09229400  |
| C | -6.59984600 | -4.43403800 | -0.00847100 |
| H | -6.36062000 | -3.94157700 | -2.10096300 |
| H | -7.22032100 | -4.70983800 | 2.04796800  |
| C | -5.32575700 | -5.20022000 | 0.05406100  |
| C | -4.53819900 | -5.11379400 | 1.21058900  |
| C | -4.72763500 | -5.75862700 | -1.08591900 |
| C | -3.17751100 | -5.39270000 | 1.17820800  |
| H | -4.96255600 | -4.69805900 | 2.12583000  |
| C | -3.36510100 | -6.03123600 | -1.12065700 |
| H | -5.31996600 | -5.91470200 | -1.98981200 |
| C | -2.54473600 | -5.76634400 | -0.01405700 |
| H | -2.57970000 | -5.19272000 | 2.06936500  |
| H | -2.92113500 | -6.39554100 | -2.04955800 |
| C | -3.93580800 | 5.59469800  | -0.01450500 |
| C | -3.25975000 | 6.08577700  | -1.14082300 |
| C | -3.16817300 | 5.33145500  | 1.12815500  |
| C | -1.87174300 | 6.16881900  | -1.16713900 |
| H | -3.82285900 | 6.35999400  | -2.03541700 |
| C | -1.78247500 | 5.41184300  | 1.10052900  |
| H | -3.65176300 | 4.94824800  | 2.02814400  |
| C | -1.09692300 | 5.76242100  | -0.07022600 |
| H | -1.38208400 | 6.51327600  | -2.08014200 |
| H | -1.22513000 | 5.09309100  | 1.98251900  |
| C | -1.07056500 | -5.61450200 | -0.13624700 |
| C | -0.19085500 | -5.83979800 | 0.93116000  |
| C | -0.54899500 | -5.00830400 | -1.28797500 |
| C | 1.12002400  | -5.37189900 | 0.89315200  |
| H | -0.54931000 | -6.34179300 | 1.83233600  |
| C | 0.75483400  | -4.53403600 | -1.32286600 |
| H | -1.20020500 | -4.82580900 | -2.14452400 |
| C | 1.59709900  | -4.65355900 | -0.21068800 |
| H | 1.75927800  | -5.50340400 | 1.76911400  |
| H | 1.10943900  | -4.01460100 | -2.21539900 |
| C | 0.36476300  | 5.50878700  | -0.17340200 |
| C | 0.92380500  | 5.07575900  | -1.38414800 |
| C | 1.19997700  | 5.50735700  | 0.95238800  |
| C | 2.21518800  | 4.56695500  | -1.44365600 |
| H | 0.31641600  | 5.06978800  | -2.29076600 |
| C | 2.48839100  | 4.98931400  | 0.89477700  |

|   |            |             |             |
|---|------------|-------------|-------------|
| H | 0.82409400 | 5.87453600  | 1.90906600  |
| C | 3.00799800 | 4.45651800  | -0.29342700 |
| H | 2.59550100 | 4.20894400  | -2.40195100 |
| H | 3.07621300 | 4.94175500  | 1.81320300  |
| C | 4.28175100 | 3.68929700  | -0.29724400 |
| C | 4.44268000 | 2.59416500  | -1.15375600 |
| C | 5.32003200 | 3.95127300  | 0.60907900  |
| C | 5.55772700 | 1.76408500  | -1.07224900 |
| H | 3.65968000 | 2.34838400  | -1.87306500 |
| C | 6.42757200 | 3.11598000  | 0.69404300  |
| H | 5.25961500 | 4.81888800  | 1.26910500  |
| C | 6.55411100 | 1.98465600  | -0.12121300 |
| H | 5.63354000 | 0.91524400  | -1.75271100 |
| H | 7.20323800 | 3.34185400  | 1.42934000  |
| C | 2.87882600 | -3.90178900 | -0.16050600 |
| C | 2.88328100 | -2.56574800 | -0.58666200 |
| C | 4.06768400 | -4.43171900 | 0.35432700  |
| C | 4.02046600 | -1.78018600 | -0.47437300 |
| H | 1.96425800 | -2.12061800 | -0.97146500 |
| C | 5.22009700 | -3.65110500 | 0.44579200  |
| H | 4.10019100 | -5.47390900 | 0.67910500  |
| C | 5.19902400 | -2.31223700 | 0.05026800  |
| H | 3.99860400 | -0.73204200 | -0.77567800 |
| H | 6.14384000 | -4.08432400 | 0.83365600  |
| C | 6.34599300 | -1.48356000 | 2.61959200  |
| C | 6.71399800 | -0.89963400 | 1.39939400  |
| C | 6.80875600 | -0.95679200 | 3.82042900  |
| N | 6.33882500 | -1.45508200 | 0.16211900  |
| C | 7.50743800 | 0.26294800  | 1.40792700  |
| C | 7.65636200 | 0.14813000  | 3.82964700  |
| H | 6.51384800 | -1.43158400 | 4.75884100  |
| C | 7.10891800 | -1.17056300 | -0.97926700 |
| C | 7.71850400 | 1.00620800  | 0.10205400  |
| C | 7.99369700 | 0.74904900  | 2.62062600  |
| H | 8.04009200 | 0.54744000  | 4.77023100  |
| C | 7.14285100 | -2.04991300 | -2.07095500 |
| C | 7.87553200 | 0.00758000  | -1.01802000 |
| H | 8.63510200 | 1.63398700  | 2.61471900  |
| C | 7.94816900 | -1.77307900 | -3.16957100 |
| H | 6.54372100 | -2.96020200 | -2.05045900 |
| C | 8.69405800 | 0.25326100  | -2.11927000 |

|   |            |             |             |
|---|------------|-------------|-------------|
| C | 8.74005100 | -0.62645200 | -3.19646800 |
| H | 7.96499900 | -2.47176800 | -4.00897800 |
| H | 9.28977900 | 1.16971800  | -2.13654700 |
| H | 9.38058300 | -0.41457800 | -4.05453200 |
| H | 5.70539600 | -2.36386200 | 2.63119100  |
| H | 8.63829900 | 1.60433000  | 0.18407100  |

**Ad[10]CPP-OH (optimized in dichloromethane)**

|   |             |             |             |
|---|-------------|-------------|-------------|
| C | -8.45638900 | 0.06867500  | 1.34895400  |
| C | -8.23198800 | 1.43889000  | 1.33690300  |
| C | -8.37351400 | 2.18573200  | 0.15954000  |
| C | -8.97187900 | 1.54100500  | -0.93437400 |
| C | -9.19742700 | 0.16912000  | -0.92206900 |
| C | -8.83227600 | -0.61423800 | 0.18418000  |
| H | -8.18706000 | -0.49271300 | 2.24488400  |
| H | -7.79640800 | 1.90076600  | 2.22423800  |
| H | -9.18336700 | 2.10167900  | -1.84737800 |
| H | -9.57897800 | -0.30989100 | -1.82630200 |
| C | -7.60257400 | 3.45110000  | 0.02206000  |
| C | -6.92770700 | 3.69973900  | -1.18120900 |
| C | -7.25565500 | 4.24767900  | 1.12412700  |
| C | -5.83038700 | 4.54988900  | -1.22857300 |
| H | -7.17324100 | 3.11780000  | -2.07091100 |
| C | -6.15538700 | 5.09612200  | 1.07759900  |
| H | -7.80385000 | 4.14608500  | 2.06310400  |
| C | -5.35853800 | 5.18758400  | -0.07388300 |
| H | -5.25581000 | 4.60906400  | -2.15450000 |
| H | -5.86970300 | 5.64059300  | 1.98010100  |
| C | -8.48945100 | -2.05777200 | 0.06631600  |
| C | -7.92884000 | -2.51431400 | -1.13443300 |
| C | -8.38081400 | -2.90424800 | 1.18079000  |
| C | -7.11333800 | -3.63750400 | -1.16523800 |
| H | -8.00548600 | -1.90450300 | -2.03583500 |
| C | -7.56339300 | -4.02864200 | 1.15005000  |
| H | -8.87063900 | -2.63484200 | 2.11893200  |
| C | -6.82246700 | -4.35433600 | 0.00326900  |
| H | -6.58329100 | -3.86770200 | -2.09064200 |
| H | -7.43587900 | -4.61214900 | 2.06425500  |
| C | -5.57130400 | -5.15819700 | 0.05656100  |
| C | -4.77451900 | -5.09776900 | 1.20836900  |

|   |             |             |             |
|---|-------------|-------------|-------------|
| C | -4.99675500 | -5.73162800 | -1.08813900 |
| C | -3.42261800 | -5.41534400 | 1.16669700  |
| H | -5.18092600 | -4.67243200 | 2.12731200  |
| C | -3.64279400 | -6.04295100 | -1.13221300 |
| H | -5.59892200 | -5.86886700 | -1.98857400 |
| C | -2.80811100 | -5.80339100 | -0.03054700 |
| H | -2.81386500 | -5.23439900 | 2.05449500  |
| H | -3.21542700 | -6.41751000 | -2.06483000 |
| C | -3.95192300 | 5.66848900  | -0.03463400 |
| C | -3.27816100 | 6.13767600  | -1.17175300 |
| C | -3.17958100 | 5.41282800  | 1.10661300  |
| C | -1.88958000 | 6.20310700  | -1.20925200 |
| H | -3.84424900 | 6.40698300  | -2.06590900 |
| C | -1.79310800 | 5.47717100  | 1.06855100  |
| H | -3.66099000 | 5.04743400  | 2.01513000  |
| C | -1.11233100 | 5.80198500  | -0.11226200 |
| H | -1.40174500 | 6.52811200  | -2.13040600 |
| H | -1.23233800 | 5.16441200  | 1.95066800  |
| C | -1.33136800 | -5.68804900 | -0.16211600 |
| C | -0.45101300 | -5.93339800 | 0.90034100  |
| C | -0.80277400 | -5.09243400 | -1.31621500 |
| C | 0.86839900  | -5.49057300 | 0.85721800  |
| H | -0.81510900 | -6.42914300 | 1.80269200  |
| C | 0.50973900  | -4.64320100 | -1.35630100 |
| H | -1.45411100 | -4.89585600 | -2.16952100 |
| C | 1.35357100  | -4.77857900 | -0.24716600 |
| H | 1.50852600  | -5.63478500 | 1.73054800  |
| H | 0.87006300  | -4.12881300 | -2.24947500 |
| C | 0.34379700  | 5.52209500  | -0.22401000 |
| C | 1.19466200  | 5.54595600  | 0.88964500  |
| C | 0.87597300  | 5.03496900  | -1.42628000 |
| C | 2.47247100  | 5.00128500  | 0.83282000  |
| H | 0.83847000  | 5.95447800  | 1.83718800  |
| C | 2.15526900  | 4.49683200  | -1.48469100 |
| H | 0.25434500  | 5.00843000  | -2.32286300 |
| C | 2.96169800  | 4.41308100  | -0.34189000 |
| H | 3.07459000  | 4.97559500  | 1.74301300  |
| H | 2.51463200  | 4.09373300  | -2.43321100 |
| C | 4.21464600  | 3.61275800  | -0.33436200 |
| C | 5.29179700  | 3.90397200  | 0.51626700  |
| C | 4.31214000  | 2.45939900  | -1.12033300 |

|   |            |             |             |
|---|------------|-------------|-------------|
| C | 6.37897700 | 3.04467000  | 0.62119600  |
| H | 5.27737100 | 4.81586600  | 1.11675600  |
| C | 5.40445400 | 1.60213500  | -1.01927100 |
| H | 3.49821000 | 2.19288800  | -1.79656400 |
| C | 6.43771900 | 1.85822900  | -0.11945000 |
| H | 7.19472900 | 3.29171200  | 1.30111400  |
| H | 5.43219200 | 0.70976700  | -1.64443400 |
| C | 2.64405100 | -4.04181700 | -0.19620300 |
| C | 2.65929400 | -2.70300100 | -0.61299500 |
| C | 3.82828200 | -4.58501700 | 0.31577000  |
| C | 3.80171100 | -1.92647000 | -0.49189200 |
| H | 1.74426300 | -2.24795700 | -0.99553500 |
| C | 4.98580400 | -3.81315300 | 0.41674700  |
| H | 3.85205600 | -5.62947000 | 0.63386900  |
| C | 4.97415700 | -2.47126300 | 0.03230400  |
| H | 3.78613200 | -0.87551300 | -0.78312500 |
| H | 5.90490600 | -4.25394400 | 0.80726400  |
| C | 6.00871900 | -1.60460600 | 2.61469600  |
| C | 6.44559700 | -1.04473700 | 1.40450400  |
| C | 6.40805800 | -1.06170600 | 3.82927200  |
| N | 6.11793500 | -1.62060100 | 0.16632600  |
| C | 7.25071500 | 0.10846400  | 1.43889100  |
| C | 7.25795700 | 0.04167800  | 3.86617000  |
| H | 6.05952100 | -1.51964700 | 4.75758000  |
| C | 6.91134000 | -1.33526300 | -0.95473500 |
| C | 7.57034100 | 0.84932000  | 0.14167700  |
| C | 7.66512800 | 0.61937500  | 2.66937100  |
| H | 7.58767300 | 0.45853900  | 4.81952700  |
| C | 6.94792700 | -2.20620500 | -2.05438700 |
| C | 7.69478600 | -0.16828500 | -0.97953200 |
| H | 8.30753700 | 1.50096800  | 2.67469300  |
| C | 7.76617400 | -1.93122800 | -3.14254200 |
| H | 6.33934100 | -3.11019100 | -2.04566200 |
| C | 8.52163600 | 0.08138800  | -2.07428900 |
| C | 8.56830600 | -0.79101700 | -3.15571700 |
| H | 7.78346000 | -2.62511500 | -3.98589000 |
| H | 9.12102400 | 0.99289600  | -2.06789000 |
| H | 9.21594100 | -0.57798900 | -4.00813300 |
| H | 5.36396900 | -2.48173500 | 2.60473600  |
| O | 8.75141700 | 1.61551400  | 0.27279000  |
| H | 9.47156400 | 1.01509600  | 0.51179600  |

**Ad[10]CPP<sup>+</sup> (optimized in dichloromethane)**

|   |             |             |             |
|---|-------------|-------------|-------------|
| C | -7.41565900 | -0.26486900 | 1.18749500  |
| C | -7.31129600 | 1.11981600  | 1.18066800  |
| C | -7.51091900 | 1.85817900  | 0.00637900  |
| C | -7.99728400 | 1.16151000  | -1.11030300 |
| C | -8.10254800 | -0.22511100 | -1.10320600 |
| C | -7.72497400 | -0.97632800 | 0.02034300  |
| H | -7.12850800 | -0.80369200 | 2.09174100  |
| H | -6.94620900 | 1.61878900  | 2.07968100  |
| H | -8.23689000 | 1.70380300  | -2.02732100 |
| H | -8.42202400 | -0.73403200 | -2.01497000 |
| C | -6.94983900 | 3.23309200  | -0.08543600 |
| C | -6.29970700 | 3.63016700  | -1.26181000 |
| C | -6.80061700 | 4.06094400  | 1.03786400  |
| C | -5.40229300 | 4.69085100  | -1.26554900 |
| H | -6.39750200 | 3.02666000  | -2.16565700 |
| C | -5.90070600 | 5.12040300  | 1.03523800  |
| H | -7.34629200 | 3.83459900  | 1.95617700  |
| C | -5.11395900 | 5.40026200  | -0.09216000 |
| H | -4.82558500 | 4.88531700  | -2.17152200 |
| H | -5.76102700 | 5.69823200  | 1.95127700  |
| C | -7.37302300 | -2.41979000 | -0.06030600 |
| C | -6.80084100 | -2.91889800 | -1.23822500 |
| C | -7.33048500 | -3.24924900 | 1.07106100  |
| C | -6.06132600 | -4.09477600 | -1.23694600 |
| H | -6.82261300 | -2.31843600 | -2.14905200 |
| C | -6.58818000 | -4.42473300 | 1.07335300  |
| H | -7.82826100 | -2.93851400 | 1.99190800  |
| C | -5.85910600 | -4.82346700 | -0.05715800 |
| H | -5.52794000 | -4.37684700 | -2.14626300 |
| H | -6.52028500 | -5.00500400 | 1.99600200  |
| C | -4.70235300 | -5.75528200 | 0.02347100  |
| C | -3.89465800 | -5.73107700 | 1.16830500  |
| C | -4.21150700 | -6.45479100 | -1.08938500 |
| C | -2.59108300 | -6.20852600 | 1.13906600  |
| H | -4.24044200 | -5.21364800 | 2.06461100  |
| C | -2.90723100 | -6.93617400 | -1.11716900 |
| H | -4.83433000 | -6.56527100 | -1.97958000 |
| C | -2.03626600 | -6.73590600 | -0.03498800 |

|   |             |             |             |
|---|-------------|-------------|-------------|
| H | -1.96058900 | -6.04752800 | 2.01463300  |
| H | -2.54278400 | -7.41412600 | -2.02869000 |
| C | -3.84804100 | 6.17614800  | -0.00814400 |
| C | -3.26975100 | 6.81587600  | -1.11453500 |
| C | -3.05787300 | 6.05327000  | 1.14240600  |
| C | -1.92104300 | 7.15553100  | -1.12501100 |
| H | -3.86708300 | 6.99626100  | -2.01081800 |
| C | -1.71052100 | 6.38626800  | 1.12902600  |
| H | -3.46817300 | 5.57368600  | 2.03258400  |
| C | -1.08858500 | 6.86424200  | -0.03294400 |
| H | -1.50002900 | 7.59781900  | -2.02985800 |
| H | -1.11401500 | 6.15417000  | 2.01184200  |
| C | -0.55504800 | -6.77277400 | -0.18018200 |
| C | 0.30530400  | -6.86228300 | 0.92378300  |
| C | 0.02050600  | -6.42986500 | -1.41297700 |
| C | 1.62553500  | -6.42928400 | 0.84304100  |
| H | -0.08131500 | -7.18952300 | 1.89067400  |
| C | 1.33798700  | -6.00223600 | -1.49613100 |
| H | -0.59978700 | -6.38463000 | -2.30928600 |
| C | 2.13619500  | -5.90021900 | -0.34937700 |
| H | 2.23110400  | -6.40365800 | 1.75177400  |
| H | 1.72278100  | -5.65779000 | -2.45817000 |
| C | 0.39324100  | 6.78115300  | -0.15114100 |
| C | 1.22564100  | 6.72062300  | 0.97614900  |
| C | 0.98371000  | 6.49354400  | -1.39139000 |
| C | 2.51005600  | 6.19522500  | 0.89502900  |
| H | 0.83993000  | 7.00467400  | 1.95643700  |
| C | 2.27121000  | 5.98190300  | -1.47548600 |
| H | 0.39473900  | 6.56816800  | -2.30651200 |
| C | 3.02467600  | 5.72514800  | -0.32139100 |
| H | 3.07666600  | 6.05597100  | 1.81763700  |
| H | 2.65954400  | 5.70069800  | -2.45590600 |
| C | 4.14767800  | 4.75144000  | -0.33182000 |
| C | 5.14038800  | 4.70036000  | 0.66123200  |
| C | 4.10303200  | 3.69264900  | -1.24844700 |
| C | 5.92052300  | 3.56327400  | 0.84382700  |
| H | 5.27033300  | 5.54103900  | 1.34503300  |
| C | 4.89092100  | 2.56526500  | -1.08433900 |
| H | 3.36518900  | 3.69524700  | -2.05051900 |
| C | 5.74990700  | 2.44188200  | 0.01892800  |
| H | 6.64615300  | 3.54189000  | 1.65856800  |

|   |            |             |             |
|---|------------|-------------|-------------|
| H | 4.75488900 | 1.72318500  | -1.76429100 |
| C | 3.32113800 | -5.00137400 | -0.33222200 |
| C | 3.18948800 | -3.77383800 | -0.99958300 |
| C | 4.47017900 | -5.20705700 | 0.44248100  |
| C | 4.10269800 | -2.75375200 | -0.80840500 |
| H | 2.30696800 | -3.58107600 | -1.60977700 |
| C | 5.40995100 | -4.18903600 | 0.62674000  |
| H | 4.62440300 | -6.16493800 | 0.94284500  |
| C | 5.18867600 | -2.94637200 | 0.04320400  |
| H | 3.94092900 | -1.77986800 | -1.27398600 |
| H | 6.28154900 | -4.35496800 | 1.26204100  |
| C | 4.99760600 | -1.68968500 | 2.58865300  |
| C | 5.57669900 | -1.03174900 | 1.47901100  |
| C | 4.58938700 | -0.97320400 | 3.68497100  |
| N | 5.94447300 | -1.74426500 | 0.35767700  |
| C | 5.69169900 | 0.39294600  | 1.48857300  |
| C | 4.69377200 | 0.43407600  | 3.71221900  |
| H | 4.16909900 | -1.50313500 | 4.54163100  |
| C | 6.67028200 | -1.15006300 | -0.64207500 |
| C | 6.16008900 | 1.04828400  | 0.31795500  |
| C | 5.20833000 | 1.09541100  | 2.63224200  |
| H | 4.34972000 | 0.99125200  | 4.58429600  |
| C | 7.22542000 | -1.92680000 | -1.68364500 |
| C | 6.80232800 | 0.26949100  | -0.67199800 |
| H | 5.25755900 | 2.18005100  | 2.64574100  |
| C | 7.92970100 | -1.31457400 | -2.69022500 |
| H | 7.10882900 | -3.00932500 | -1.66502200 |
| C | 7.52797300 | 0.86331000  | -1.74663500 |
| C | 8.09109100 | 0.09106700  | -2.72449900 |
| H | 8.38001000 | -1.92665000 | -3.47389500 |
| H | 7.64576400 | 1.94685500  | -1.75696000 |
| H | 8.66590400 | 0.55190200  | -3.52859600 |
| H | 4.89052000 | -2.77056100 | 2.58096900  |

**Ad[10]CPP· (optimized in dichloromethane)**

0 2

|   |            |             |             |
|---|------------|-------------|-------------|
| C | 9.07534200 | -0.94472400 | -0.96413600 |
| C | 9.13864200 | 0.44403900  | -0.96008300 |
| C | 8.69069000 | 1.18504000  | 0.14489400  |
| C | 8.40945700 | 0.46983400  | 1.31688700  |

|   |            |             |             |
|---|------------|-------------|-------------|
| C | 8.34651000 | -0.91739400 | 1.31295100  |
| C | 8.56198900 | -1.64826900 | 0.13677500  |
| H | 9.34282800 | -1.48195700 | -1.87654800 |
| H | 9.45405500 | 0.95968300  | -1.86961900 |
| H | 8.08347200 | 1.00106100  | 2.21241600  |
| H | 7.97382900 | -1.42234100 | 2.20549400  |
| C | 8.17501200 | 2.57552500  | 0.02075300  |
| C | 7.98158500 | 3.41441100  | 1.12922500  |
| C | 7.54930900 | 2.94997500  | -1.17636700 |
| C | 7.04247800 | 4.43928800  | 1.09739700  |
| H | 8.50959600 | 3.21243800  | 2.06360500  |
| C | 6.61203000 | 3.97371300  | -1.20809200 |
| H | 7.68428400 | 2.34229500  | -2.07235600 |
| C | 6.25878800 | 4.66918800  | -0.04409700 |
| H | 6.86157500 | 5.01645200  | 2.00659000  |
| H | 6.04916600 | 4.13339600  | -2.12897800 |
| C | 7.92516500 | -2.98679800 | 0.00581000  |
| C | 7.66746800 | -3.81510900 | 1.10894200  |
| C | 7.26278800 | -3.29603400 | -1.19023700 |
| C | 6.64743400 | -4.75931800 | 1.07364000  |
| H | 8.21507600 | -3.66520500 | 2.04186800  |
| C | 6.24447700 | -4.23919800 | -1.22531300 |
| H | 7.44290400 | -2.69306300 | -2.08153400 |
| C | 5.84325900 | -4.91609100 | -0.06597800 |
| H | 6.42493800 | -5.32840700 | 1.97866700  |
| H | 5.66582200 | -4.34467800 | -2.14424500 |
| C | 4.47808400 | -5.50415100 | -0.00834200 |
| C | 3.80858100 | -5.96654600 | -1.15124500 |
| C | 3.71835300 | -5.35355600 | 1.16008100  |
| C | 2.42587800 | -6.10961500 | -1.16611200 |
| H | 4.36878300 | -6.16154600 | -2.06794900 |
| C | 2.33729200 | -5.50156800 | 1.14673500  |
| H | 4.19603100 | -5.00074500 | 2.07542300  |
| C | 1.65193400 | -5.80339800 | -0.03706100 |
| H | 1.93497000 | -6.41581800 | -2.09224400 |
| H | 1.77570400 | -5.26666300 | 2.05267100  |
| C | 4.93857600 | 5.35243200  | 0.01391600  |
| C | 4.16520700 | 5.24383200  | 1.17810400  |
| C | 4.30547100 | 5.86387400  | -1.12904700 |
| C | 2.79519600 | 5.47246900  | 1.15768900  |
| H | 4.61544300 | 4.85784700  | 2.09395900  |

|   |             |             |             |
|---|-------------|-------------|-------------|
| C | 2.93357100  | 6.08613100  | -1.15170900 |
| H | 4.88187300  | 6.03086700  | -2.04120000 |
| C | 2.13624700  | 5.81572600  | -0.02974100 |
| H | 2.21516500  | 5.26521700  | 2.05879400  |
| H | 2.46675700  | 6.42389600  | -2.07936000 |
| C | 0.18434100  | -5.58318800 | -0.11464400 |
| C | -0.36509100 | -4.97822400 | -1.25334500 |
| C | -0.66555700 | -5.77563900 | 0.98320200  |
| C | -1.66695500 | -4.49417600 | -1.25730200 |
| H | 0.26406700  | -4.80122800 | -2.12755800 |
| C | -1.97070400 | -5.29634100 | 0.97639000  |
| H | -0.29296700 | -6.28551400 | 1.87418900  |
| C | -2.48578700 | -4.59494700 | -0.12425100 |
| H | -2.02202800 | -3.95415700 | -2.13664100 |
| H | -2.59324700 | -5.44937900 | 1.86009100  |
| C | 0.66159900  | 5.65991200  | -0.12203400 |
| C | 0.10272800  | 5.07151900  | -1.26493200 |
| C | -0.19291400 | 5.88893100  | 0.96563600  |
| C | -1.21394900 | 4.63203200  | -1.28055600 |
| H | 0.73413900  | 4.86923700  | -2.13181700 |
| C | -1.51238700 | 5.45253700  | 0.94837700  |
| H | 0.18791800  | 6.38986300  | 1.85811300  |
| C | -2.03983700 | 4.76165500  | -0.15445700 |
| H | -1.57458500 | 4.10161500  | -2.16278500 |
| H | -2.13588300 | 5.63094700  | 1.82622700  |
| C | -3.35137100 | 4.07287300  | -0.09962800 |
| C | -4.06452300 | 3.72909200  | -1.26146000 |
| C | -3.86891700 | 3.60063500  | 1.11925000  |
| C | -5.18687500 | 2.92139800  | -1.21806300 |
| H | -3.71984800 | 4.08321100  | -2.23437600 |
| C | -4.99411900 | 2.79807900  | 1.17311400  |
| H | -3.33960800 | 3.81112100  | 2.04985300  |
| C | -5.69570200 | 2.40405800  | 0.00290900  |
| H | -5.65583700 | 2.64987500  | -2.16085400 |
| H | -5.29871200 | 2.40993600  | 2.14278600  |
| C | -3.78215400 | -3.87334600 | -0.06267600 |
| C | -4.24089600 | -3.32010400 | 1.13905800  |
| C | -4.54222800 | -3.59542400 | -1.20531100 |
| C | -5.36143000 | -2.50241200 | 1.19570100  |
| H | -3.67736600 | -3.48137800 | 2.05995200  |
| C | -5.66620100 | -2.77990700 | -1.16438700 |

|   |             |             |             |
|---|-------------|-------------|-------------|
| H | -4.24919900 | -4.01775600 | -2.16859700 |
| C | -6.09238600 | -2.18930400 | 0.03745900  |
| H | -5.63631200 | -2.06637700 | 2.15367100  |
| H | -6.19619200 | -2.58419800 | -2.09335200 |
| C | -8.26003900 | -1.22904100 | -2.12698100 |
| C | -7.59780800 | -0.58057800 | -1.08630900 |
| C | -8.68703600 | -0.51235800 | -3.24118900 |
| N | -7.17298800 | -1.27836100 | 0.07956200  |
| C | -7.37550000 | 0.81552200  | -1.13398500 |
| C | -8.48462400 | 0.86527100  | -3.29905900 |
| H | -9.20407100 | -1.02835500 | -4.05249700 |
| C | -7.47276700 | -0.57277000 | 1.27728800  |
| C | -6.75691700 | 1.42980700  | 0.05039500  |
| C | -7.84868300 | 1.52184200  | -2.25178500 |
| H | -8.84627100 | 1.43743600  | -4.15567300 |
| C | -8.00533400 | -1.22184300 | 2.38990400  |
| C | -7.24592400 | 0.82007200  | 1.29499700  |
| H | -7.75006500 | 2.60708200  | -2.28295800 |
| C | -8.30836900 | -0.50061500 | 3.54002900  |
| H | -8.18321700 | -2.29745400 | 2.34407700  |
| C | -7.58945200 | 1.53245800  | 2.45635600  |
| C | -8.10560900 | 0.87947500  | 3.56873200  |
| H | -8.72582400 | -1.01387200 | 4.40845600  |
| H | -7.47637900 | 2.61708500  | 2.47301200  |
| H | -8.36936300 | 1.45351400  | 4.45916200  |
| H | -8.45513200 | -2.29939800 | -2.05097600 |

## 11. References

- [1] R. Liu, H. Gao, L. Zhou, Y. Ji, G. Zhang, Effects of N-Substitution on the Property of Acridone. *ChemistrySelect*. **2019**, *4*, 7797-7804.
- [2] Q. Huang, G. Zhuang, H. Jia, M. Qian, S. Cui, S. Yang, P. Du, Photoconductive Curved-Nanographene/Fullerene Supramolecular Heterojunctions. *Angew. Chem. Int. Ed.* **2019**, *58*, 6244-6249.
- [3] X. Zhang, K. Lan, C. Cheng, Figure-Eight Bismacrocycles Derived from a Tetraphenylmethane Core and Oligoparaphenylene Loops. *Org. Lett.* **2024**, *26*, 7853-7857.
- [4] K. Kurihara, K. Yazaki, M. Akita, M. Yoshizawa, A Switchable Open/closed Polyaromatic Macrocycle that Shows Reversible Binding of Long Hydrophilic Molecules. *Angew. Chem. Int. Ed.* **2017**, *56*, 11360-11364.
- [5] E. R. Darzi, E. S. Hirst, C. D. Weber, L. N. Zakharov, M. C. Lonergan, R. Jasti, Synthesis, Properties, and Design Principles of Donor-Acceptor Nanohoops. *ACS. Cent. Sci.* **2015**, *1*, 335-342.
- [6] O. V. Dolomanov, L. J. Bourhis, R. J. Gildea, J. A. K. Howard, H. Puschmann, *J. Appl. Cryst.* **2009**, *42*, 339-341.
- [7] G. M. Sheldrick, *Acta Cryst* **2015**, *A71*, 3-8.
- [8] G. M. Sheldrick, *Acta Cryst* **2015**, *C71*, 3-8.

- [9] Y. Segawa, H. Omachi, K. Itami, Theoretical Studies on the Structures and Strain Energies of Cycloparaphenylenes. *Org. Lett.* **2010**, *12*, 2262-2265.
- [10] G. W. T. M. J. Frisch, H. B. Schlegel, G. E. Scuseria, M. A. Robb, J. R. Cheeseman, G. Scalmani, V. Barone, G. A. Petersson, H. Nakatsuji, X. Li, M. Caricato, A. V. Marenich, J. Bloino, B. G. Janesko, R. Gomperts, B. Mennucci, H. P. Hratchian, J. V. Ortiz, A. F. Izmaylov, J. L. Sonnenberg, D. Williams-Young, F. Ding, F. Lipparini, F. Egidi, J. Goings, B. Peng, A. Petrone, T. Henderson, D. Ranasinghe, V. G. Zakrzewski, J. Gao, N. Rega, G. Zheng, W. Liang, M. Hada, M. Ehara, K. Toyota, R. Fukuda, J. Hasegawa, M. Ishida, T. Nakajima, Y. Honda, O. Kitao, H. Nakai, T. Vreven, K. Throssell, J. A. Montgomery, Jr., J. E. Peralta, F. Ogliaro, M. J. Bearpark, J. J. Heyd, E. N. Brothers, K. N. Kudin, V. N. Staroverov, T. A. Keith, R. Kobayashi, J. Normand, K. Raghavachari, A. P. Rendell, J. C. Burant, S. S. Iyengar, J. Tomasi, M. Cossi, J. M. Millam, M. Klene, C. Adamo, R. Cammi, J. W. Ochterski, R. L. Martin, K. Morokuma, O. Farkas, J. B. Foresman, and D. J. Fox, Gaussian 16, Gaussian, Inc., Wallingford CT. *Revision A.03 2016*.
- [11] S. Grimme, J. Antony, S. Ehrlich, H. Krieg, A consistent and accurate ab initio parametrization of density functional dispersion correction (DFT-D) for the 94 elements H-Pu. *J. Chem. Phys.* **2010**, *132*, 154104.
- [12] S. Grimme, S. Ehrlich, L. Goerigk, Effect of the damping function in dispersion corrected density functional theory. *J. Comput. Chem.* **2011**, *32*, 1456-1465.
- [13] F. Weigend, R. Ahlrichs, Balanced basis sets of split valence, triple zeta valence and quadruple zeta valence quality for H to Rn: Design and assessment of accuracy. *Phys. Chem. Chem. Phys.* **2005**, *7*, 3297-3305.
- [14] F. Weigend, Accurate Coulomb-fitting basis sets for H to Rn. *Phys. Chem. Chem. Phys.* **2006**, *8*, 1057-1065.
- [15] J. Tomasi, B. Mennucci, R. Cammi, Quantum mechanical continuum solvation models. *Chem. Rev.* **2005**, *105*, 2999-3094.
- [16] W. Humphrey, A. Dalke, K. Schulten, VMD: visual molecular dynamics. *J. Mol. Graph.* **1996**, *14*, 33-38.
- [17] T. Lu, F. Chen, Multiwfn: A multifunctional wavefunction analyzer. *J. Comput. Chem.* **2012**, *33*, 580-592.
- [18] T. Yanai, D. P. Tew, N. C. Handy, A new hybrid exchange–correlation functional using the Coulomb-attenuating method (CAM-B3LYP). *Chem. Phys. Lett.* **2004**, *393*, 51-57.
- [19] A. Charaf-Eddin, A. Planchat, B. Mennucci, C. Adamo, D. Jacquemin, Choosing a functional for computing absorption and fluorescence band shapes with TD-DFT. *J. Chem. Theory Comput.* **2013**, *9*, 2749-2760.
- [20] P. Pracht, F. Bohle, S. Grimme, Automated exploration of the low-energy chemical space with fast quantum chemical methods. *Phys. Chem. Chem. Phys.* **2020**, *22*, 7169-7192.
- [21] C. Bannwarth, S. Ehlert, S. Grimme, GFN2-xTB—An accurate and broadly parametrized self-consistent tight-binding quantum chemical method with multipole electrostatics and density-dependent dispersion contributions. *J. Chem. Theory Comput.* **2019**, *15*, 1652-1671.
